# Supplementary material for: Ancient mitogenomes from Pre-Pottery Neolithic Central Anatolia and the effects of a Late Neolithic bottleneck in sheep (Ovis aries)
Source: PubMed Central journal article supplement (PMC11014441; doi:10.1126/sciadv.adj0954), 2024-04-12
Supplement: sciadv.adj0954_sm.pdf [file sciadv.adj0954_sm.pdf]

Supplementary Materials for  
**Ancient mitogenomes from Pre-Pottery Neolithic Central Anatolia and the effects of a Late Neolithic bottleneck in sheep (*Ovis aries*)**

Edson Sandoval-Castellanos *et al.*

Corresponding author: Edson Sandoval-Castellanos, edson.sandoval@gen.vetmed.uni-muenchen.de;  
Ivica Medugorac, ivica.medjugorac@gen.vetmed.uni-muenchen.de; Daniel G. Bradley, dbradley@tcd.ie;  
Joris Peters, joris.peters@palaeo.vetmed.uni-muenchen.de

*Sci. Adv.* **10**, eadj0954 (2024)  
DOI: 10.1126/sciadv.adj0954

**This PDF file includes:**

Texts S1 to S10  
Figs. S1 to S16  
Tables S1 to S14  
References

### **Supplementary Text S1. Ancient and modern sample preparation**

Each bone sample was irradiated with UV light from a short distance for 30 minutes (UV hand lamp 115C with lamp stand, 254 nm, Peqlab). Then, in a DNA workstation I (Kisker Biotech), approximately 1 mm of the bone surface was removed with a mill/drill unit (Micromot 50/E, Proxxon) at the position intended for sampling. The milling head was then flamed with a staff lighter and the drill cleaned with DNA away™ (Carl Roth).

Subsequently, about 250 mg of sample powder were obtained with the mill/drill tool. Before processing a new sample, the instruments used and the workstation were cleaned with DNA away™, the milling head of the drill was flamed, and laboratory gloves changed.

For modern samples, DNA from previous projects of collaborating groups or EDTA blood was used as starting material for further molecular genetic analyses.

### **Supplementary Text S2. DNA extraction of ancient and modern DNA samples**

DNA extraction from ancient material combined the extraction protocols of Rohland et al. (74) and Rohland and Hofreiter (75). Rohland et al. (74) tested the ratio of binding buffer to extraction buffer, with the best results obtained when binding and extraction buffers were in a 1:2 ratio. Extraction and binding buffers were prepared according to the protocol of (74). The described wash buffer, elution buffer, and the preparation of the silica suspension are identical in both protocols. The following extraction steps were performed according to the protocol of (74): To about 250 mg of sample powder, 5 mL of extraction buffer were added, and the samples were then incubated at 37° C in a warming cabinet under constant agitation. The incubation period was extended to approximately 40 h. Subsequently, the samples were centrifuged for at least 2 min at 5,000 × g and the supernatant transferred to a new 15 mL tube. To the supernatant, 2.5 mL of binding buffer and 100 µL of silica suspension were added and the samples were incubated for 3 h under constant agitation in the dark. The samples were then centrifuged for 2 min at 5,000 × g and the supernatant discarded. The subsequent extraction steps were carried out according to the protocol of (75): 1 mL of binding buffer was added to the silica pellet and the silica re-suspended and transferred to a 2 mL tube. This was followed by the described purification steps. The silica pellet was finally dried at room temperature with open lids for about 15 min. To the dried silica pellet 50 µL elution buffer was added, the silica was re-suspended and incubated for about 10 min with closed lids. After centrifugation at 16,000 × g for 2 min, the supernatant was finally transferred to a new 1.5 mL tube. All DNA extractions were accompanied by extraction controls.

DNA extraction of tooth and petrous bone samples was performed with minor changes according to the method of Dabney et al. (76). 80 mg to 180 mg of sample powder were used per sample to which 2 mL extraction buffer were added. The incubation time was extended to approximately 40 h. As a binding apparatus the High Pure Viral Nucleic Acid Large Volume Kit (Roche) described by Korlevic et al. (77) was used. After two wash steps with PE buffer (Qiagen), two elution steps with 25 µL elution buffer EB (Qiagen) were performed, resulting in 50 µL DNA extract for each sample.

For modern samples, the commercially available reagent kit DNeasy Blood & Tissue Kit (Qiagen, Germany) was used to extract DNA from ovine blood samples according to the manufacturer's instructions.

### **Supplementary Text S3. PCR of ancient and modern DNA samples**

In the initial phase of the study, the following PCR primer sets were used to test the quality and the haplogroup of the ancient DNA: Ovis 110 bp (*cytochrome b*, *CYTB*), nt positions 14578 – 14687 (accession nr. AF010406, haplotype *B*) with a sequence framed by the primer pair of 67 bp (nt positions 14601 – 14667) using the primer pair 110-F (5'-CTGAGGAGCAACAGTTATTACCA-3', nt positions 14578 – 14600) and 110-R (5'-GGGTGAGGGAGCTTTGTCT-3', nt positions 14687 – 14668), Ovis HVRI, 137 bp, nt positions 16051 – 16187 (accession nr. AF010406, haplotype *B*) with a sequence framed by the primer pair of 97 bp (nt positions 16071 – 16167) using the primer pair 137-F (5'-GATCACGAGCTTGTTCACCA-3', nt positions 16051 – 16070) and 137-R (5'-GCCCTGAAGAAAGAACCAGA-3', nt positions 16187 – 16168) as well as the primer set Ovis HVRI, 118 bp, nt positions 16175 – 16292 (accession nr. AF010406, haplotype *B*) with a sequence framed by the primer pair of 78 bp (nt positions 16195 – 16272) using the primer pair 118-F (5'-

CTTTCTTCAGGGCCATCTCA -3', nt positions 16175 – 16194) and 118-R (5'-ACCAAATGCATGACACCACA-3', nt positions 16292 – 16273).

*Conventional PCR:* PCRs were performed in 20 µL reaction mixtures consisting of 50 mM KCl, 15 mM Tris-HCl (pH 8.0), 4 mM MgCl<sub>2</sub>, 0.250 mM dATP (Peqlab), 0.250 mM dCTP (Peqlab), 0.250 mM dGTP (Peqlab), 0.500 mM dUTP (Peqlab), 0.8 mg/mL UV irradiated bovine serum albumin (BSA; Thermo Scientific), 0.20 µM each primer, 2 U AmpliTaq Gold DNA polymerase (Life Technologies), 0.5 U uracil-DNA glycosylase (UDG), heat-labile (Affymetrix), and 2 µL ancient DNA extract. Initially, an incubation step with uracil-DNA glycosylase was performed at 37°C for 15 min. Amplification cycles were started by an initial denaturation step at 94°C for 10 min, followed by 45 cycles of: denaturation at 95°C for 45 sec, annealing at specific temperature for 40 sec, extension at 72°C for 40 sec. PCR was finished by final extension at 72°C for 10 min. The amplification reactions were carried out in a TPersonal thermal cycler (Biometra).

*Real-Time PCR:* qPCRs were performed in 20 µL reaction mixtures consisting of 0.8 mg/mL UV irradiated bovine serum albumin (BSA; Thermo Scientific), 0.20 µM each primer, 10.0 µL Fast SYBRTM Green Master Mix (2x mix; Applied Biosystems) and 2 µL ancient DNA extract. The Fast SYBRTM Green Master Mix contains uracil-DNA glycosylase (UDG).

Initially, an incubation step at 37°C for 10 min was performed. Amplification cycles were started by an initial denaturation step at 95°C for 20 sec, followed by 50 cycles of: denaturation at 95°C for 5 sec, annealing at specific temperature for 20 sec, and extension at 60°C for 10 sec. Amplifications were followed by a dissociation gradient from 65°C to 95°C with 0.5°C / 5 sec. The qPCRs were carried out in a CFX96 Touch™ Real-Time PCR Detection System (Bio-Rad).

For the three primer sets the following annealing temperatures were used: 110-F/110-R (58°C), 137-F/137-R (56°C), 118-F/118-R (56°C).

For modern samples, mitochondrial DNA was amplified with three overlapping large PCR products spanning the whole circular genome. The following PCR primer pair were used: (i) MitoOAR1F (5'-AGCAATTCATAGCCTCCT-3', nt positions 13654-13673) and MitoOAR1R (5'-GAAACAAACCGAGCACCATT-3', nt positions 3318-3337) with PCR product of 6320 bp, (ii) MitoOAR2F (5'-GAAAAGGCCCAAACGTTGTA-3', nt positions 2845-2864) and MitoOAR2R (5'-TTCACCTCGCCCATTTCTAC-3', nt positions 8304-8323) with PCR product of 5460 bp, and (iii) MitoOAR3F (5'-AGTCAACAACCGCCTCATCT-3', nt positions 8046-8065) and MitoOAR3R (5'-CCAACCCCACTTACAAT-3', nt positions 13967-13986) with PCR product of 5920 bp.

PCRs were performed in 12.5 µL reaction mixtures consisting of 2.25 µL GoTaqLong PCR Master Mix, 0.9 µL upstream primer, 0.9 µL downstream primer, 1.0 µL template DNA 15ng/µL and 3.45 µL Nuclease-Free Water. Amplification cycles were started by an initial denaturation step at 94°C for 2 min, followed by 10 cycles of: denaturation at 94°C for 30 sec, annealing at 61°C for 30 sec, extension at 70°C for 36 min and 30 sec followed by 25 additional cycles of: denaturation at 94°C for 30 sec, annealing at 60°C for 30 sec, extension at 70°C for 6 min and 30 sec plus 10 sec per cycle. PCR was finished by final extension at 72°C for 10 min. The amplification reactions were carried out in a TPC-100 thermal cycler (MJ Research Inc.).

#### **Supplementary Text S4. DNA sequencing of short ancient DNA amplicons**

Purified amplification products were directly sequenced with the BigDye Terminator v1.1 Cycle Sequencing Kit and a 3730 DNA Analyzer (Applied Biosystems). The 10 µL cycle sequencing reaction mix contained 4.62 µL PCR grade water (Thermo Fisher Scientific), 1.63 µL 5× Sequencing buffer, 0.75 µL BigDye Terminator Sequencing Mix v1.1 (2.5×), 1.0 µL of 5.0 pmol/µL sequencing primer, and 2.0 µL DNA template. Cycling conditions were as follows: an initial denaturation step at 96°C for 1 min, followed by 35 cycles of: 96°C for 10 sec, 55°C for 15 sec, and 60°C for 4 min; and 4°C until storage. Instrument: TPersonal thermal cycler (Biometra). Clean-up of the reaction and the sequencing runs were performed by the Sequencing Service of the Genomics Service Unit, Faculty of Biology, Biocenter, Ludwig Maximilian University of Munich (LMU).

#### **Supplementary Text S5. TCD ancient samples preparation and sequencing**

Ancient material processed at Trinity College Dublin was done so in dedicated ancient DNA facilities as previously described in (78). Briefly, 125 mg of bone powder was obtained from cleaned, surface UV-irradiated bone via pulverisation. DNA was extracted from bone powder using a 48-hour EDTA-proteinase K digest at 37°C following an initial 30 min EDTA pre-digestion. Supernatant was separated from the remaining bone powder via spin-down and subjected to cleanup using MinElute columns, with DNA eluted in 40µl. To reduce DNA damage, purified DNA was USER™ treated: 16.25µl of DNA with 5 µl (1U/1µL) USER™ were incubated for 3 hours at 37°C. USER treated DNA was then used in dsDNA library construction (79), modified by Gamba and colleagues (80), followed by Accuprime Pfx supermix amplification for 10-16 cycles to reach ~5ng/ul. DNA was quantified using an Agilent Tapestation 2200.

Libraries were sequenced using an Illumina HiSeq 2500 (Macrogen, Seoul). After bioinformatic processing (see below), samples with low (< 5%) endogenous DNA content were subjected to mitochondrial read enrichment using RNA baits (Daicel Arbor Bioscience) following manufacturer's protocol for degraded DNA as described in (78). Captured libraries were not subjected to the uracil-DNA glycosylase treatment. Enriched, amplified libraries were sequenced using an Illumina MiSeq (TrinSeq, Dublin).

## **Supplementary Text S6. LMU ancient samples preparation and sequencing**

### ***Library preparation***

Library preparation was performed, with slight modifications, according to the protocol of Gansauge and Meyer (81). For the library preparation, 10 µL of ancient DNA extract were used per sample. In addition, water controls, extraction controls and samples not treated with the enzyme *Archaeoglobus fulgidus* (Afu) uracil-DNA glycosylase (New England Biolabs) were carried along.

First, it was tested whether the amount of CircLigase II (Epicentre) added per sample could be reduced while prolonging the incubation time, as this enzyme is very cost-intensive. The amount of CircLigase II per sample was finally reduced by half.

Thus, after treatment of the samples with the enzymes Afu uracil-DNA glycosylase, endonuclease VIII (New England Biolabs), and FastAP alkaline phosphatase (Thermo Fisher Scientific), 2 µL instead of 4 µL CircLigase II were added per sample. In this context, the reaction volume was set to 60 µL instead of 80 µL and the incubation time for the ligation of the first adapter was extended from 1.0 to 3.0 h. The following steps, i.e. immobilization of ligation products on beads, primer annealing and extension, blunt-end repair and ligation of the second adapter, were performed exactly as described by Gansauge and Meyer (81).

Subsequently, the beads were resuspended in 30 µL TET buffer, the bead suspension was incubated at 95°C in a ThermoMixer MKR13 (HLC/DITABIS) for 2 min and then immediately transferred to a magnetic rack (DynaMag™-2 magnet, Life Technologies). Finally, the supernatant was pipetted into a 0.5 mL tube and frozen to -20 C.

The library amplification and indexing was performed in a reaction volume of 70 µl.

Index Primers from Index Primers Set 1 and Index Primers Set 2 (NEBNext® Multiplex Oligos for Illumina®, New England Biolabs) were used as "P7 indexing primers".

The reaction conditions corresponded to the protocol of Gansauge and Meyer (81), whereby 15 cycles were carried out in a Peqstar 2× gradient thermocycler (Peqlab).

The subsequent purification was performed with the MinElute PCR purification kit (Qiagen). Since the AccuPrime Pfx Reaction mix (Life Technologies) is alkaline (~ pH 9.0), 2 µL of a 3 M Sodium acetate buffer (pH 5.2, Sigma Aldrich) were added to each sample during purification. Finally, the libraries were eluted in a 26 µL elution buffer and frozen to -20°C.

Regarding library amplification and indexing, the reaction mixture was prepared in a laboratory of the ArchaeoBioCenter, but amplification and indexing reactions were performed in the Biocenter.

## ***Sequencing and assembly of mitogenomes***

For ancient samples barcoded libraries were pooled and enriched by hybridization to an Agilent SureSelect capture array with 244k oligo spots. The oligos were designed to include all mitogenome variants observed by sequencing a panel of European breeds included in this study. After a 65-hour hybridization in the presence of cot-I sheep DNA and adapter blocking oligos at 65°C, the capture array was washed, and the captured library molecules were eluted at 95°C for 10 min in a volume of 500 µL of DNA-grade water. The enriched libraries were then amplified by PCR, analyzed on the Bioanalyser and sequenced in 2\*50bp paired end mode on a HiSeq1500 sequencer from Illumina. The custom sequencing Primer CL-72 (5'-ACACTCTTCCCTACACGACGCTCTTCG-3') was used for read-1.

For modern samples, 2µl of three overlapping long PCR products (6320 bp, of 5460 bp and 5920 bp) were visualized in 1% agarose gel electrophoresis separately. Three PCR products from a single animal that were clearly visible and of the expected length were pooled in a 1.5ml tube and were purified with Wizard SV Gel and PCR Clean-Up System. 1.0 ng of pooled and clean PCR products were converted to sequencing libraries by tagmentation (NexteraXT, Illumina, San Diego USA) following the manufacturers instruction. Dual-barcoded libraries were pooled in equimolar amounts and sequenced in 2\*100 bp mode on a HiSeq1500 sequencer from Illumina.

The reads obtained by sequencing of short-read mtDNA libraries were clipped to remove the sequencing adapter, length filtered to >20bp and mapped to mitogenome reference (GenBank NC\_001941.1, concatenated with human mitogenome MF479165.1 to exclude spurious contamination by human DNA) using a Burrows–Wheeler transform (82). After removal of duplicate reads, variants were called with VARSCAN (83) and replaced in the reference fasta file. This adapted reference was used for iterative mapping and variant calling until no further variants could be identified. The resulting fasta file of the assembled mitochondrial genome, masked for bases with no coverage, was used for further analyses.

## **Supplementary Text S7. Online sourced mitogenomes**

Our dataset included 309 samples sourced from published studies and public databases (details in Tables S4–S5). From them, 172 were sourced from whole genome-sequencing data and from them 166 mitogenomes were extracted from the NCBI Sequence Read Archive. For this, we downloaded the data converted to fastq files that were later mapped to a reference mitogenome and then filtered to keep only reads that mapped to the mitochondrial genomes. All the bioinformatics procedures involved in this step, as well as the validation, alignment and annotation of the obtained sequences are identical to those described in (50).

## **Supplementary Text S8. Demographic inference on coalescent times**

The phylogenetic tree, in the clade that corresponds to the domestic sheep, contains an apparent excess of nodes around 12.0-7.6 ka cal BP that can be either the signature of some events associated with domestication or a byproduct of having a proportionally large number of ancient samples in the mentioned interval. To choose between these alternatives, we designed an analysis based on the coalescent theory to link coalescent times (nodes) and a demographic history. It consisted in an MCMC procedure that sampled the posterior distribution of demographic histories conditional to the empirical data. The “empirical” data was constituted by the set of coalescent times (nodes) estimated with the BEAST phylogeny plus the entire set of samples’ ages. The historical demography consisted in a time-series of effective population size values ( $N_e$ ). The posterior probabilities of the MCMC were obtained from the probability of a coalescent happening at time  $t$ , conditional to the effective population size  $N_e$ :

$$P(T = t) = e^{\frac{kt}{2N_e}} * (2N_e)^{-1} \quad , \text{Equation 1 (84)}$$

where  $t$  is the time duration of the period, and  $k$  is the number of combinations of 2 in  $X$  ( $X$  is the number of lineages available for coalescence). If the number of lineages changes due to a coalescent event (reducing the number of available lineages) or the appearance of ancient samples or migrants (increasing the available

lineages) then the "lack of memory" property of the coalescent can be invoked, recalling that the coalescent is a continuous time Markov chain. Because of that, the entire probability can be calculated piecewise using Equation 1 upon time bins where both  $N_e$  and the number of lineages are constant, and the whole probability being the product of them all. This still can approach any conceivable demographic history with an adjustable degree of resolution. It is also mathematically very convenient because the use of non-stepwise functions would require the solution of analytically unsolvable integral equations (except for functions of exponential growth).

To calculate the probability of the "empirical" data (coalescent times and samples' ages) given a defined demographic history the vector of inter-arrival times is made not only considering the coalescent times and samples ages but also the boundaries of the time-bins of the demographic history (see Fig. S1).

With this simple procedure we carried out an MCMC procedure that sampled the parametric space of demographic histories. We inferred demographic histories with 16-, 32-, and 64-time bins. The time boundaries of the 16-bins demographic histories were: 0.0, 1.0, 2.0, 3.0, 4.0, 5.0, 6.0, 7.0, 8.0, 9.0, 10.0, 11.0, 12.0, 13.0, 14.0, 15.0, and 25.0 ka cal BP. The 32-bins and 64-bins histories just had the same periods split by half or split in four equal-sized bins.

Convergence was assessed by running two chains in parallel and comparing the demographic histories of them. The differences among averaged histories, measured as the sum of differences of time bins were under 1% after 100-200 thousand generations. We ran 10 million generations sampled, stored every 10,000 generations, and used a 25% burnin for analysis. We used a Metropolis-Hastings algorithm with a normal distribution used as the jump distribution with standard deviation set to 2.5% the parameters range. The prior distributions of the demographic histories consisted in a set of log-uniform distributions for each  $N_e$  value with boundaries in  $10^2$ - $10^7$ . The software was coded, debugged, and compiled in Fortran 90 with the assistance of the IDE implemented in Microsoft Visual Studio Professional 2015 version 14.0.25431.01 update 3, with Fortran compilers from the package Intel® Parallel Studio XE 2018 update 1. The software is available at: <https://doi.org/10.5281/zenodo.10392203>.

This analysis allowed us to assess the potential effect of the ancient samples in the accumulation of coalescent events around 12.0-7.6 ka cal BP. If such an accumulation was a sampling artefact, the estimated demographic history would be non-informative, flat, or noisy, around the focal period.

## **Supplementary Text S9. Simulation-based inference by approximate Bayesian computation**

To better understand the relationships among the sampled ancient and modern populations, and to infer their demographic parameters, we carried out several rounds of statistical analysis by means of approximate Bayesian computation, or ABC (73, 85). ABC performs statistical inference by running large amounts of simulations under a specific model (in our case the coalescent model of molecular evolution). ABC methods use simulations that link the known data with unknown variables (parameters) that are sampled from prior probability distributions and create simulated datasets that are theoretically equivalent to the empirical data. Parameters are inferred from posterior probability distributions approached by a rejection algorithm that ranks simulations according to the distance between the empirical and the simulated datasets and rejects simulations out of a threshold or by selecting the k-nearest neighbours of the empirical data. For calculating the distances ABC employs summary statistics that ideally should capture all the relevant information of the datasets. To perform hypotheses contrasts, called model choice analyses, ABC approaches the model likelihoods from the acceptance ratios of the different models in the non-rejected (accepted) set.

We used ABC for four inferential goals plus one validation analysis, each (except the first one) employing the results of previous ones:

1. The first phase was aimed to determine the demographic differences among layers of Asikli Höyük. For this, we carried out two analyses, a parameters inference of the effective population size ( $N_e$ ) in each layer and a model choice analysis (hypotheses contrast) with three models: (i) a continuous model over the entire occupation timespan of Asikli Höyük; (ii) a model with two periods with boundary around 9.7 ka cal BP; and (iii) a model with four periods, one for each sampled layer (dated at 9.425, 9.625, 9.850 and 10.150 ka cal BP) (see Fig. S9). All models also included one pre- and one post-occupation period containing samples

from Körtik Tepe and Güvercinkayası, respectively. The time boundaries of all periods had some variability (set with priors) following time constraints of the samples.

As an extension of phase one, we carried out an analysis of PODs (Pseudo-Observed Dataset Analysis) to test the statistical power of the ABC methodology to detect demographic changes at Aşiklı Höyük. The rationale of this analysis is that simulated datasets can be used as empirical data to estimate the statistical power to detect the alternative scenarios in a model choice analysis (hypothesis contrast). For this, the datasets created in the simulations under every model are used as empirical data to perform model choice analyses by ABC many times recording the number of times when the analyses selected the right model. The PODS analysis used simulations under model A of phase one (Fig. S9) but with the population sizes being fixed according to the alternative models. We tested 21 models, each with a different size in the Aşiklı Höyük population: 10 models had larger sizes, 10 smaller, and 1 had the same size as the previous population. Each of the 21 models required a full PODs analysis with 1,000 PODs (i.e. 1,000 rounds of post-simulation analysis) with instrumental tables made of 125,000 simulations for each of the 21 models.

2. The second phase consisted in a model choice analysis for selecting the best scenario of evolutionary relationships among the sampled ancient Anatolian populations, namely, Neolithic Aşiklı Höyük, Calcolithic Güvercinkayası, and Neolithic southwestern Anatolia. The models included a scenario where all samples belonged to a single continuous population as well as a scenario where all three populations split from a common ancestor during the Epipaleolithic (see Fig. S10).
3. The third phase was also a model choice analysis aimed to select the best model describing the evolutionary relationship of the European population (including both ancient and modern) with respect to the ancient Anatolian populations. The five tested models were constituted by scenarios where the European sheep population descended from either Neolithic Aşiklı Höyük, Calcolithic Güvercinkayası, Neolithic southwestern Anatolia, or an unrelated (and unsampled) ancestral population (Fig. S11).
4. The fourth phase was an extension of phase three, where the selected model (Europe descending from Neolithic southwestern Anatolia) was used to carry out a parameter estimation analysis focused on population sizes ( $N_e$ ) of all the eight populations involved in the time-space structure of the used model (Fig. S11-C).

All analyses described above were performed in two steps each: the optimization step and the inferential step. The optimization step consisted in a pre-run of typically one million simulations (for each model) and the obtained posterior distributions were used to set the priors of the inferential runs. This was performed in two ways: if the posterior was a relatively narrow, symmetrical, and bell-shaped, then a normal distribution (usually a log-normal for population sizes and mutation rate) was adjusted by matching the 95% probability boundaries of the posterior and new distributions and verifying the closeness of their distribution means. If the posterior was not bell shaped, then the adjustment only consisted in re-defining the boundaries of a uniform or log-uniform prior.

For the inferential step, the model choice analysis only required  $1.25-2.5 \times 10^6$  simulations (per model) while parameters estimation analyses were performed with  $1.0 \times 10^6$  simulations. Phase 3, however, got a boost in the number of simulations to  $2.4 \times 10^7$  for improving accuracy and reducing the approaching error.

We replicated all post-simulation analyses to address Bayes sufficiency. This is because a high number of summary statistics improves the Bayes sufficiency problem i.e. the need to capture the relevant information of the data (here, the DNA alignment) (86) whereas a low number of summary statistics improves the statistical power, reduces the approaching error, and ameliorates the accuracy loss due to high dimensionality, a phenomenon called “the curse of dimensionality” (87). We observed such a problem in finding different parameters being better estimated with different sets of summary statistics while the use of a composite set produced worse results (e.g. high variance posteriors). To fix that, we analyzed in parallel three to six sets of summary statistics and reported the posteriors of an intermediate set with the highest consistency (see Tables S7-S10).

We also replicated all model choice analysis with a machine learning-assisted method termed random forests-ABC (86). This method, which is within the spectrum of ABC methods, offers several advantages including a theoretical resilience to the “curse of dimensionality” that affects conventional ABC. All this to push the boundaries of the statistical capabilities of ABC to detect the magnitude and placement of the presumptive

demographic events associated with domestication. Following its creators' advice, we ran the random forests-ABC procedure with 100,000 simulations per model and used all summary statistics available, namely: HapTypes, PrivHaps, SegSites, PairDiff, NucDiver, GenDiver, TajimasD, and FusFs for each statistical group (population); and PairDifG, Fst, SharedHap, and ShareFreq for each pair of statistical groups (populations). See the definition of the summary statistics in Table S7.

The coalescent simulations and the post-simulation analysis (rejection, Epanechnikov adjustment, regression procedures) were performed in an updated cluster-compatible version of the software BaySICS (88), available at <https://doi.org/10.5281/zenodo.10210930>. The updates to BaySICS were coded, debugged, and compiled in Fortran 90 with the assistance of the IDE implemented in Microsoft Visual Studio Professional 2015 version 14.0.25431.01 update 3, with Fortran compilers from the package Intel® Parallel Studio XE 2018 update 1.

## **Supplementary Text S10. Archaeological information**

### Bulgaria

The site of Dzhulyunitsa (or Džuljunica) is located north of the Balkan Mountains and south of the Danube basin, in north central Bulgaria. The four stratified layers of the settlement are radiocarbon dated to c. 8.15–7.45 ka cal BP, covering the entire sequence of the Early Neolithic in southeastern Europe. Dž–I is contemporary with the pre-Karanovo I and Karanovo I cultures of the Early Neolithic in Bulgaria. Dž–II is characterized by rather thick deposits partly overlapping with Dž–I. Dž–III is a levelling layer. Dž–IV is characterized by a drastic decrease in the settlement size, and new ceramics representing the early 6th millennium BCE (89). Cattle and caprines were important, while suids were avoided throughout the sequence (90). Samples from this site are in rows 457-458 of Table S5.

### Georgia

Tamara's Fort, also called Dariali Fort (Coordinates: UTM 38N 469400, 4731800), is found in the border zone between Georgia and Russia in the Kazbegi region, sitting atop a high flat outcrop on the west bank of the Tergi river. The site was investigated by Eberhard Sauer (Edinburgh University) and colleagues in the ERC project "Persia and its Neighbors".

Excavations at Tamara Fort indicated several occupations, focused between the Sassanian era (3rd-7th centuries A.D.) and until the 9/10th centuries during which period its function was a military fort. Between the late 13th and early 15th centuries AD the site was re-occupied, but there is no evidence for occupation following this until the 20th century (91).

Approximately half a ton of animal bones was analyzed during four excavation seasons, supervised by Marjan Mashkour. Domestic herbivores (cattle, sheep, and goats) are dominant in the faunal remains, with a single domestic goat genome showing Iranian-like ancestry (78). Caucasian tur specimens were discovered among the remains (91), which showed East Caucasian tur (*Capra cylindricornis*) genetic affinity at the nuclear and mitochondrial genome levels (92).

14 samples are reported here, corresponding to rows 504-517 of Table S5.

### Germany

The Alzey site is located in western Germany, in the state of Rhineland-Palatinate. The site is dated to Roman era, at approximately the second century A.D. The sample from here has been classified as Iron Age in all analyses, given the Roman era was considered part of the historic Iron Age (93). The sample from this site is in row 461 of Table S5.

A single sample included in this project was from the Roman site of Nida-Hedderheim in Frankfurt, from the state of Hesse in Germany. The sample was archaeologically dated to the Iron Age, in the second century, contemporary with Roman era samples also included in this project. Four samples were from Mainz in



Germany. These samples were dated to the second century A.D. and are contemporary to the sample from Frankfurt. The samples from these sites are in rows 459, 460, and 462-464 of Table S5.

The site Herxheim in southwest Germany is a Neolithic site, associated with the linear pottery culture (LBK). The site was occupied for three to four hundred years, from about 7,000 years ago. The site is famous for containing a mass grave. Three samples from this site are included in this study. Two of them are considered Neolithic, although have not been directly dated. A third sample which gave both abnormal archaeological context and abnormal results in subsequent analyses has been given the designation Iron Age, however without directly dating the sample it is difficult to accurately predict the age of a sample and hence the designation of Iron Age should not be considered firm (94). In consequence this sample was removed from the dataset. The two other samples are in rows 465-466 of Table S5.

### United Kingdom

The Ness of Brodgar is a Late Neolithic complex on Mainland, Orkney, dating from circa 3500 to 2300 cal BC (95). The two samples included are from the large animal bone deposit in Structure 10 dating to around 2340–2200 cal BC (96) or 2565–2360 cal BC (96). The two samples, aBROD1-GBR (= NOB'09 1237 tRP Bag3 3331) and aBROD2-GBR (= NOB'09 1239 Bag3 3382) are in lines 485-486 of Table S5.

Snusgar is a Norse settlement at the Bay of Skail, West Mainland, Orkney. Due to the dimensions of the hall and the assemblage, together with the place-name of the bay, the site has been interpreted as an estate center or skáli, which was probably subordinate in status to the Earldom estates (96, 97). The dataset includes two samples from a well-preserved longhouse on East Mound, which is one of two excavated settlement foci at the site: aORKN1-GB - SG10 TR5 2204 phase 3 - 10th-11th Century, and aORKN2-GB - SG10 TR5 2259 phase 5 - 11th-12th Century, which are in lines 472 and 470 of Table S5, respectively.

Sligeanach is a Bronze Age site on the island of South Uist, Western Isles, dated to 2200–1700 cal BC (98). One sample is included in this dataset, aSILG1-GBR, (= SL98 11.6.98 Context 18 TrenchA Mound3 1339), which is in line 467 of Table S5.

The Early Bronze Age-Early Iron Age (c. 2000-500 BC) site of Cladh Hallan in South Uist, Western Isles, is known for its exceptionally well preserved Late Bronze Age-Early Iron Age roundhouses c. 1050-500 BC (99). The huge artefact assemblage, including bronze and gold metalwork, attests to the inhabitants' prosperity and long-distance contacts. Five samples are included dating from Late Bronze Age to Early Iron Age contexts:

aHALL1-GBR = CH00 1414 House 401 Phase 11 (995-860 BC)

aHALL2-GBR = CH97 462 House 401 Phase 14 (755-595 BC)

aHALL3-GBR = CH00 1436 House 150 Phase 14 (755-595 BC)

aHALL4-GBR = CH01 2405 W Area Phase 9 (1085-965 BC)

aHALL5-GBR = CH01 2408 NE Area Phase 6 (1310-1080 BC)

Those samples are in lines 479-483 of Table S5.

Bornais is a multiperiod site located on South Uist in the Western Isles. Analysis of the site has dated a large amount of material to the mid-first millennium A.D (100). One sample is included in this dataset from a Late Iron Age midden dated to the 5th-6th century AD (aBORN1-GBR = B099 21/6/99 M1 Newtrench context 448) which is in line 475 of Table S5.

The Norse site of Cille Pheadair (Kilpheder) on the island of South Uist, Western Isles, is a single farmstead successively occupied and rebuilt in nine phases between c. AD 1000 and 1220 (101). The rich assemblage of pottery, ironwork, gold, and silver reveals that this longhouse's inhabitants had long-distance connections across the Viking world. Two samples are included in this dataset, aKILP2-GBR (= Kil'96 #091 Phase 8; AD 1140-1205) and aKILP3-GBR (= Kil'96 #303 Phase 7; AD 1105-1160), which are in lines 473-474 of Table S5.

Potterne is a late Bronze Age/Early Iron Age site in the village of Potterne, Wiltshire. Dates for the site range from 3430 ±110 to 2490 ±70 uncal BP; the majority of finds are attributed to the Late Bronze Age and Early Iron Age. The site contained a rich record of pottery, charred plants, and animal remains (102). One sample is included in this dataset, aPOTT2-GBR (= 1983.200 2624 2616-2624 Box 4088), which is in line 484 of Table S5.

Danebury is an Iron Age Hillfort, Hampshire, excavated in the 1970s and is considered a type-site for hillforts. Occupation of the site lasted approximately 500 years, beginning 2,500 years ago (103). Three samples are included in this dataset: aDANE1-GBR (= DA71 P78 10), aDANE2-GBR (= DA74 P658 4), and aDANE3-GBR (= DA71 P110 3) which are in lines 476-478 of Table S5.

The site of Hungate, York, has had continuous occupation for over 2000 years. One sample included in this study originates from Area H2, a medieval pit backfill that likely dates to the 11th Century. The sample is labelled aHUNG1-GBR (= 48302 Area H2) and is in line 471 of Table S5.

### Ireland

Three samples were provided via a collaboration with Dr. Finbar McCormick. Two samples are from the Viking site of Fishamble Street, Dublin, and are among the most recent (ancient) samples included in this study, being approximately 900 years old (104). The third sample from Moynagh Crannog near Nobber in Co. Meath is an early medieval sample probably 7-9th century AD. These samples are in rows 487-489 of Table S5.

### Malta

Tarxien is a late Neolithic temple site in Malta. A single sample included in this project is from the site and has not been directly dated. Three megalithic temples are at the site, dating to approximately 3,000 B.C.E. (105). This sample is in row 490 of Table S5.

### Serbia

The site of Blagotin is in central Serbia within the village of Poljna, 26 km from the town of Trstenik. It is located on a gently sloping terrace, above an incised stream valley at the base of a mountain. Blagotin is a multi-period and stratigraphically complex site. It was initially inhabited during the Early Neolithic (Starčevo culture), reoccupied during the Eneolithic, and occupied again during the Early Iron Age. Each of the occupations only partially overlapped the other, resulting in both lateral displacement and vertical superposition of cultural stratigraphy (106). Recent radiocarbon dates place it among the earliest sites in the Starčevo culture – ca. 6100 cal BC (107, 108). In total 12 samples from the site were analyzed and directly dated as a part of this project, and it is confirmed to be the Early Neolithic. The samples from this site appear in rows 491-502 of Table S5.

The site of Bubanj is located on a low river terrace, near the confluence of the Nišava and the Južna Morava rivers, 5 km west of the town of Niš, in south-eastern Serbia. Bubanj is the eponymous site of the Central Balkan Eneolithic cultural traditions and is of great importance for the understanding of the development of prehistoric metal age societies in the region. It is a multi-layered site, with up to 3.5-m-thick cultural layers dating from the Early/Middle Neolithic, through the Eneolithic and Early Bronze Age, to the Early Iron Age. Altogether, the occupation covers a time frame of about 5000 years. The major portion of the cultural deposit is attributed to the Eneolithic (ca. 4500-2500 cal BC), which is represented by three successive settlements (109). The only sample from the site was directly dated to confirm its context and it is dated to the Early Eneolithic. This sample appears in row 503 of Table S5.

### Israel

One sample came from the Israeli site of Tel Masos, which is a small tel located some 12 km east of the city of Beersheva in the northern Negev. The main occupation of the tel dates to the Chalcolithic and Iron Age I periods. The sample included in this project was directly dated to the Chalcolithic, mid-5th to 4th millennium BC. It is in row 524 of Table S5.

The site of Tel Miqne/Ekron is situated on the Israeli coastal plain ca. 35 km south-west of the city of Jerusalem. The main site occupation was in the Late Bronze Age II to the end of the Iron Age (ca. late 16th -

15th centuries to 7th /6th centuries BC) with scanty earlier Chalcolithic and Early Bronze Age remains (110). Four samples from the site were included in this project. They are in rows 520-523 of Table S5.

Tel Yoqne'am (sometimes referred to as Tel Yokneam) is located ca. 30 km inland and to the south of the city of Haifa. It was occupied from the Early Bronze Age (ca. 3150-2200 cal BC) to the Ottoman period i.e. 19th century AD (111). Three samples analyzed for this project are from the later layers of the site associated with the Islamic period or the Crusader occupation of the site, and as such have been classified as Medieval. One of the samples was directly dated and confirms that it is from these later, Medieval layers. Those samples appear in rows 518-519 and 525 of Table S5.

Shiqmim is a large village site, dating to the Chalcolithic period, that is located on the banks of the Beersheva Stream in the the northern Negev Desert, Israel. The site has four occupation strata spanning the time range 4500 to 3700 cal BC. Two samples from the site were included (112). They are in rows 526-527 of Table S5.

## Türkiye

A single sample in this study is from the site of Çukuriçi Höyük, in western Türkiye. The site was used through both the Neolithic and the Chalcolithic periods. The sample from this site is considered to be from the middle of the Neolithic occupation of the site, approximately 8,500 years ago. Settlers diet consisted of both domesticated animals like cattle and sheep, and wild hunted animals such as hare and deer (113). This sample appears in row 545 of Table S5.

The site of Körtik Tepe, in Diyarbakır, in eastern Türkiye is one of the oldest included in this study, dating from 12,000 years before present. The site is from the pre-pottery Neolithic A and does not show signs of animal domestication (114-116). The site was later occupied during the Medieval period, and although some caution is advised, all samples were archaeologically dated to the early Neolithic. The two samples analyzed here appear in rows 628-629 of Table S5.

Our study also includes several samples from the Marmara region in western Türkiye. The samples are considered Neolithic, with two being directly dated, confirming that they are approximately 8,000 years old. The samples from this region appear in rows 528-532 and 541-542 of Table S5.

Menteşe Höyük in northwestern Türkiye is dated as Neolithic. The site shows evidence of domesticated animals, with the animal remains being skewed towards domestic species and away from hunted wild animals (11). None of the eight samples included in this project have been directly dated, however other samples from the site have been dated, confirming the Neolithic context. These specimens appear in rows 533-540 of Table S5.

Two samples included within this project are from the site of Suberde, a Neolithic site that is considered one of the earliest to show sheep management in central Anatolia. In initial studies, the site was thought to have been a hunter village but recent work suggests that the site represents an early central Anatolian location in which sheep were being managed (117). The large faunal assemblage that was extracted from the site is still being studied. The two samples in this project have not been directly dated and appear at rows 543 and 544 of Table S5.

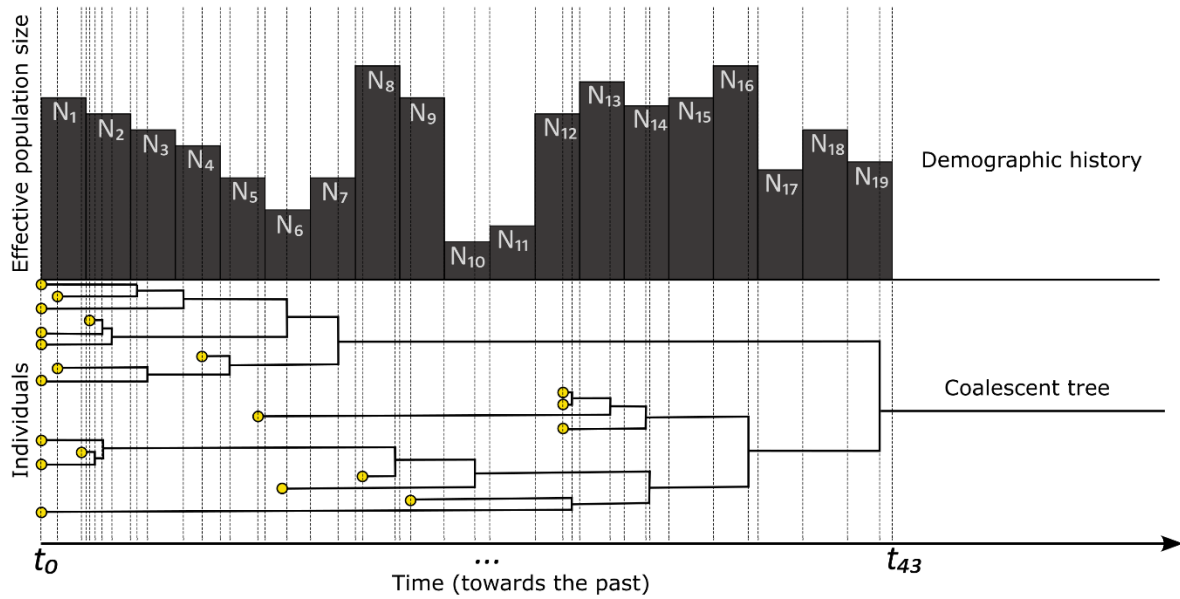

**Fig. S1. Demographic inference from coalescent times.** A direct probability modelling (an exponential probability density function) relates the effective population size to the inter-coalescent times. The computation is much facilitated by using stepwise demographic history i.e. a collection of constant size periods with fixed time boundaries (here the set  $\{N_1, N_2, N_3, \dots, N_{19}\}$ ). The posterior probability of the demographic history is the prior probabilities times the product of every constant-size time period that is limited by any of these options: (i) a coalescent event, (ii) an appearance of an ancient sample or migrant, or (iii) a population size change. In the figure, there are 43 of those periods, indicated by vertical dotted lines.

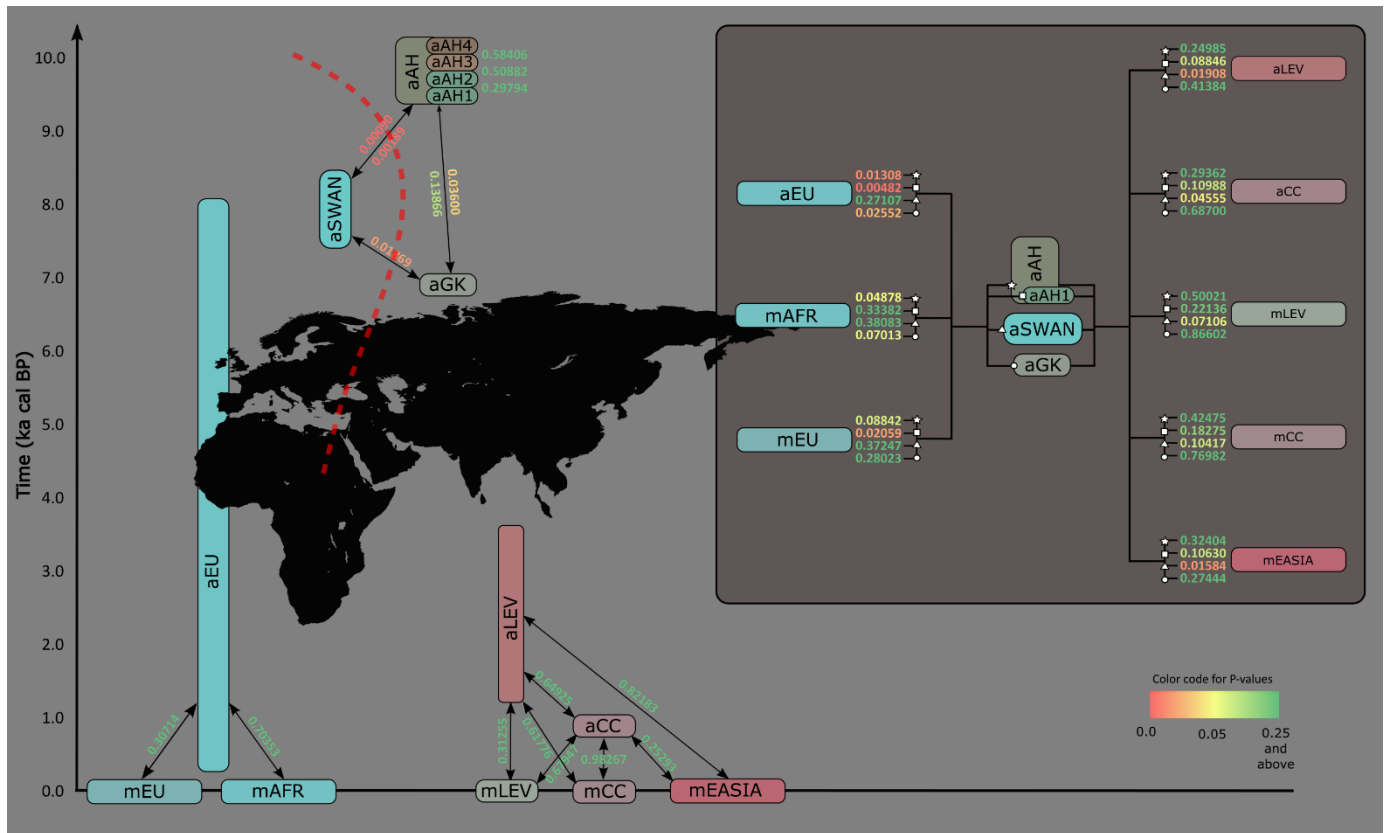

**Fig. S2. Graphical summary of temporal tests.** Values upon black lines show the P-value of a temporal test of haplogroup frequencies (Bayesian test with  $N_e = 10^4$ ) between the two samples at the two extremes of the line, pointed by the arrow tips. They were extracted from **Table S6**. The colors of those values only indicate the degree of statistical significance (color code at bottom right). The box (top right) shows the P-values of the comparisons between pairs made of an ancient Anatolian sample and a non-Anatolian one. The four values correspond to the comparison of the given sample (e.g. aEU = ancient Europe) and the four Anatolian samples at the center, namely aAH (Aşıklı Höyük, full sample), aAH1 (Aşıklı Höyük youngest layers, 2A-C), aSWAN (Neolithic southwestern Anatolia including Suberde, Çukuriçi, Menteşe and Marmara regions), and aGK (Güvercinçayası). For instance, the four values in front of mAFR (modern Africa), correspond to the comparisons: modern Africa-Aşıklı Höyük (0.048), modern Africa-Aşıklı Höyük layers 2A-C (0.33), etc. Samples codes follow Table 1 and S5.

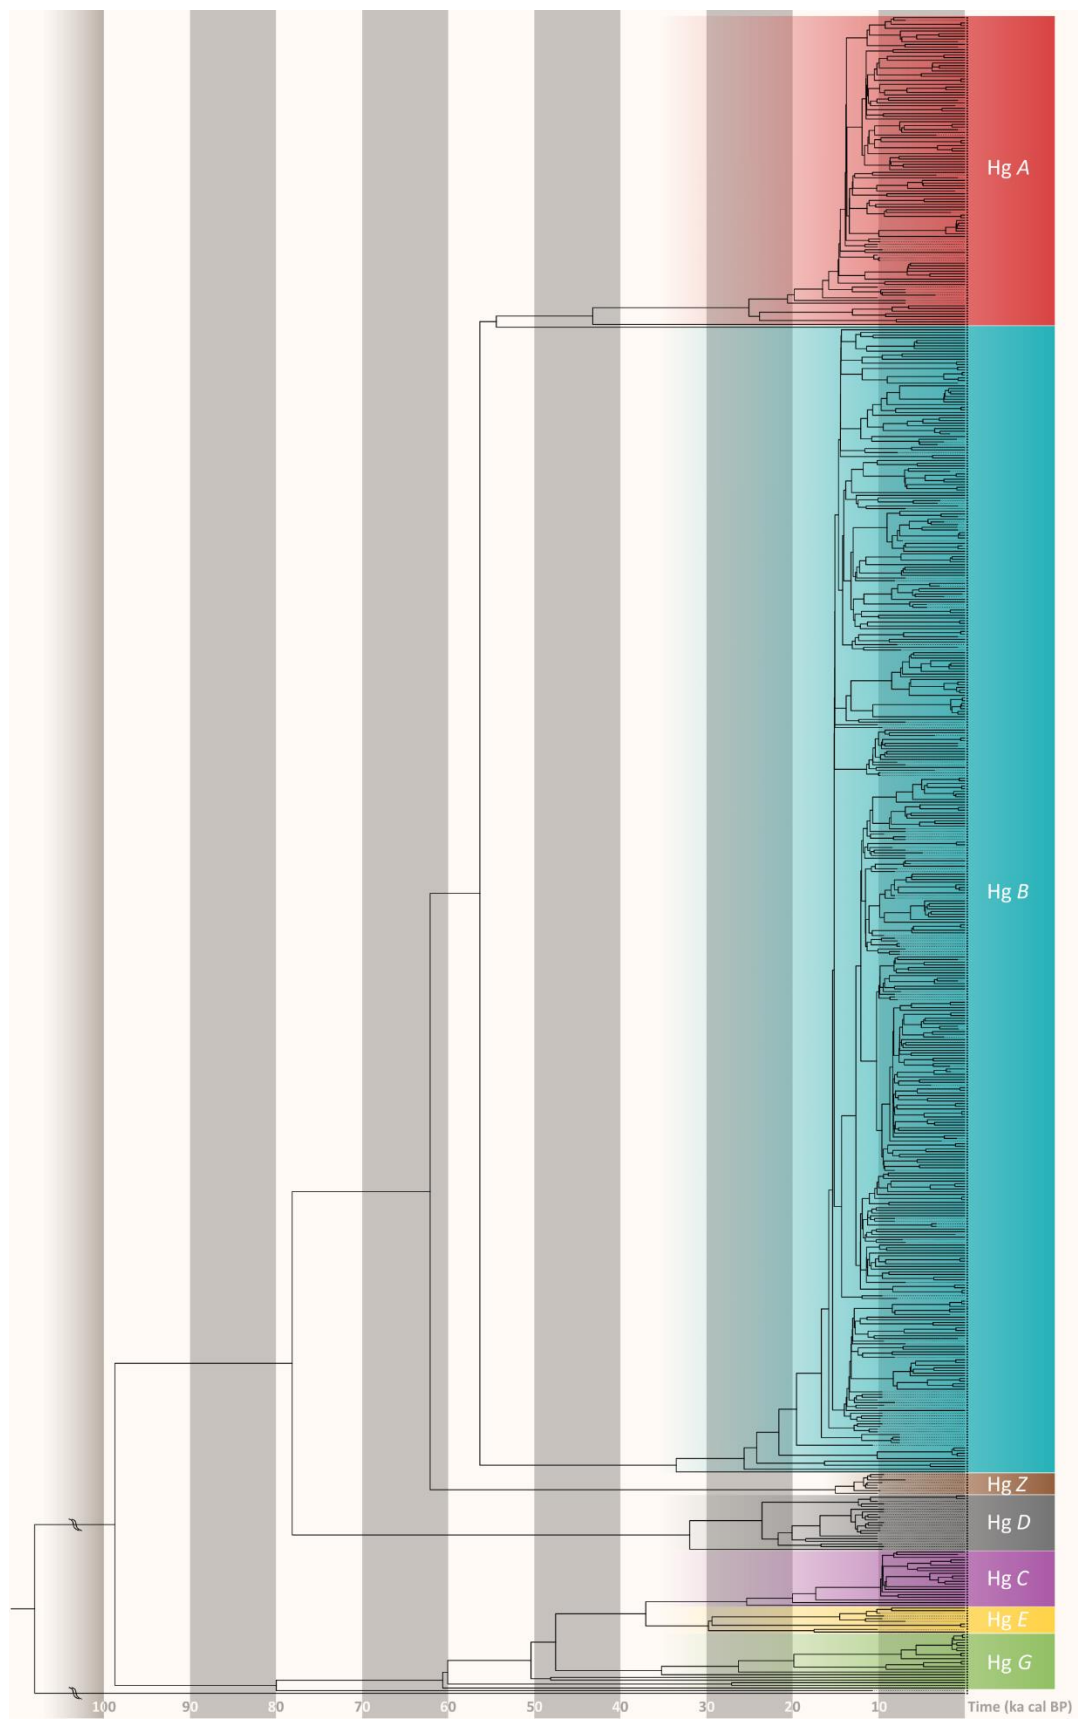

**Fig. S3. Phylogenetic reconstruction of all 629 mitogenomes.** The labels have been removed (see Figs. S4-S7 to identify individual labels and geographic origin). Hg is short for haplogroup.



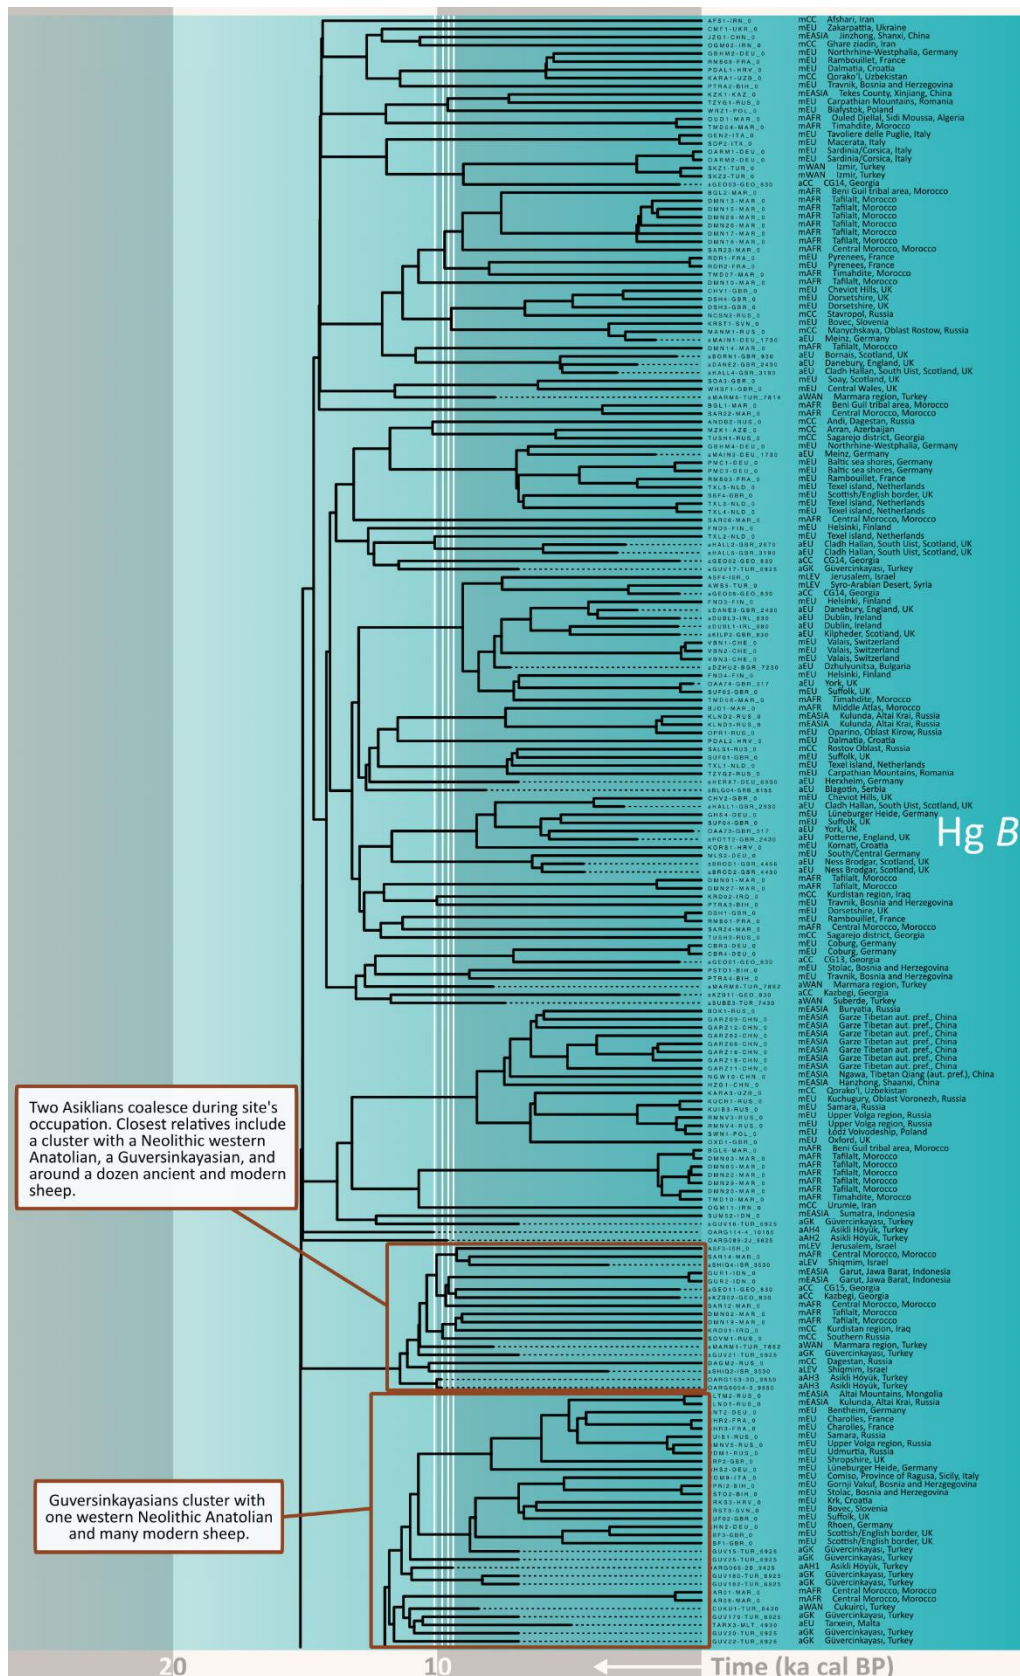

**Fig. S5. Phylogenetic reconstruction, partial.** This corresponds to an expanded view, with labels and comments, of Fig. S3, middle-top. White lines indicate the medium time of archaeological layers 2A-C (youngest), 2D-J, 3A-E, & 4A-C (oldest) of Asikli Höyük.



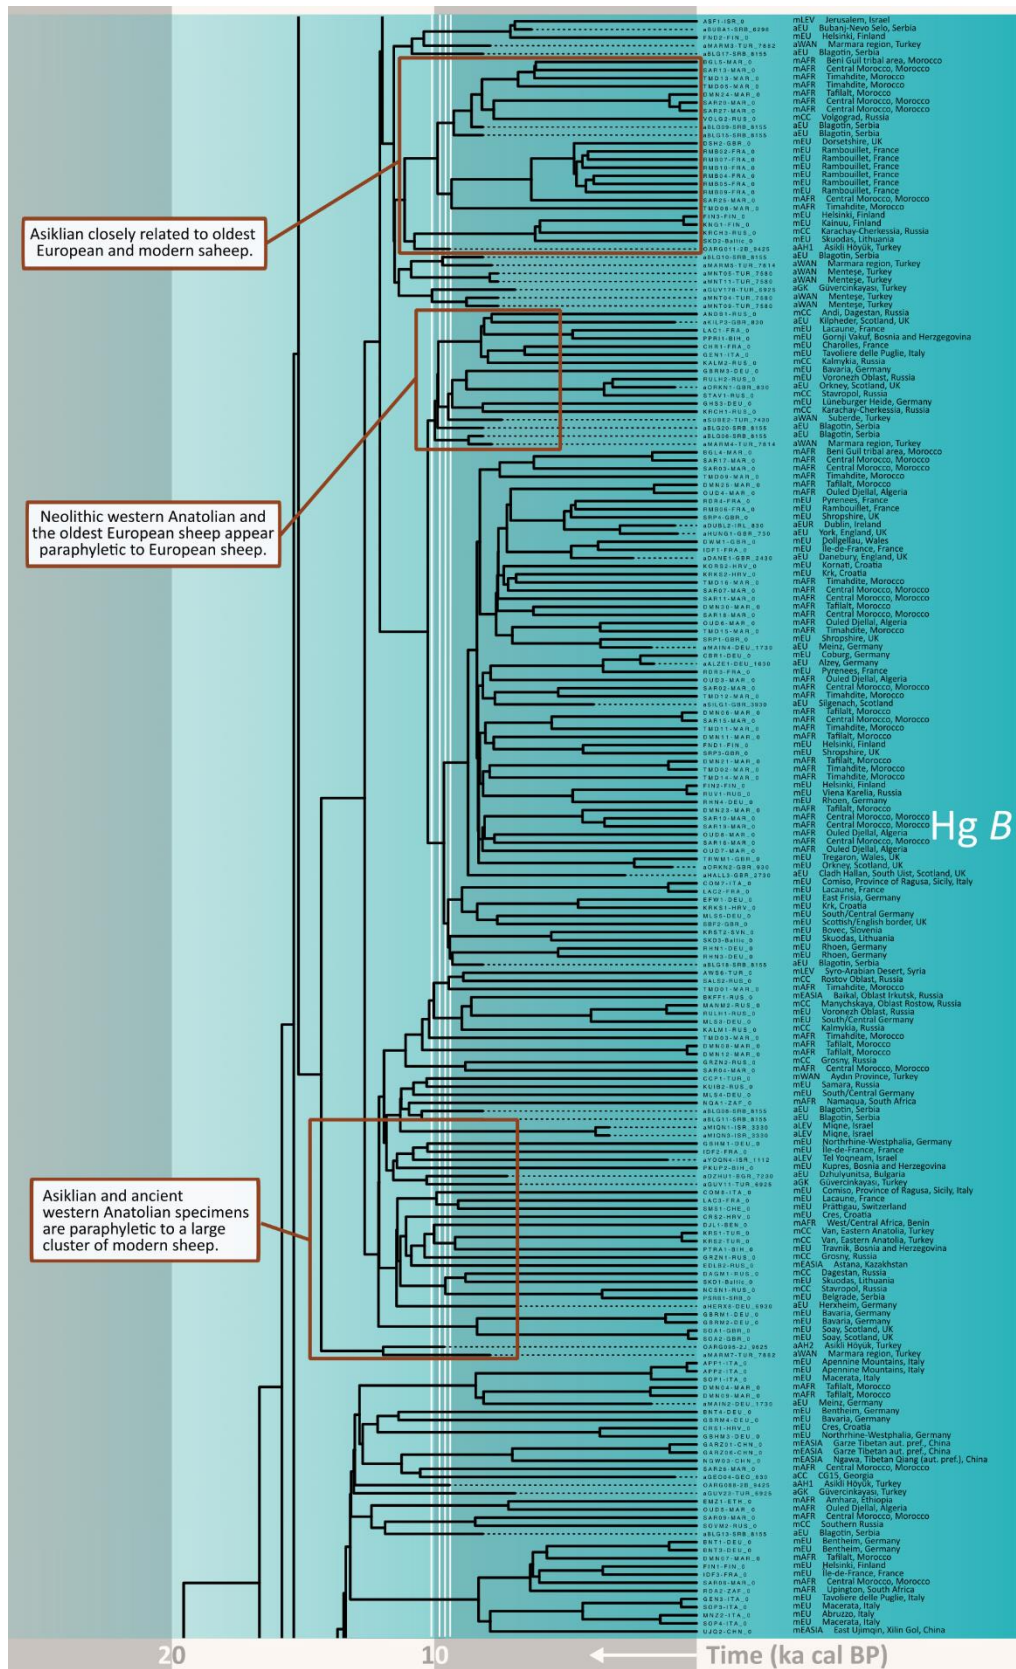

**Fig. S6. Phylogenetic reconstruction, partial.** This corresponds to an expanded view, with labels and comments, of Fig. S3, middle-bottom. White lines indicate the medium time of archaeological layers 2A-C (youngest), 2D-J, 3A-E, & 4A-C (oldest) of Asikli Höyük.

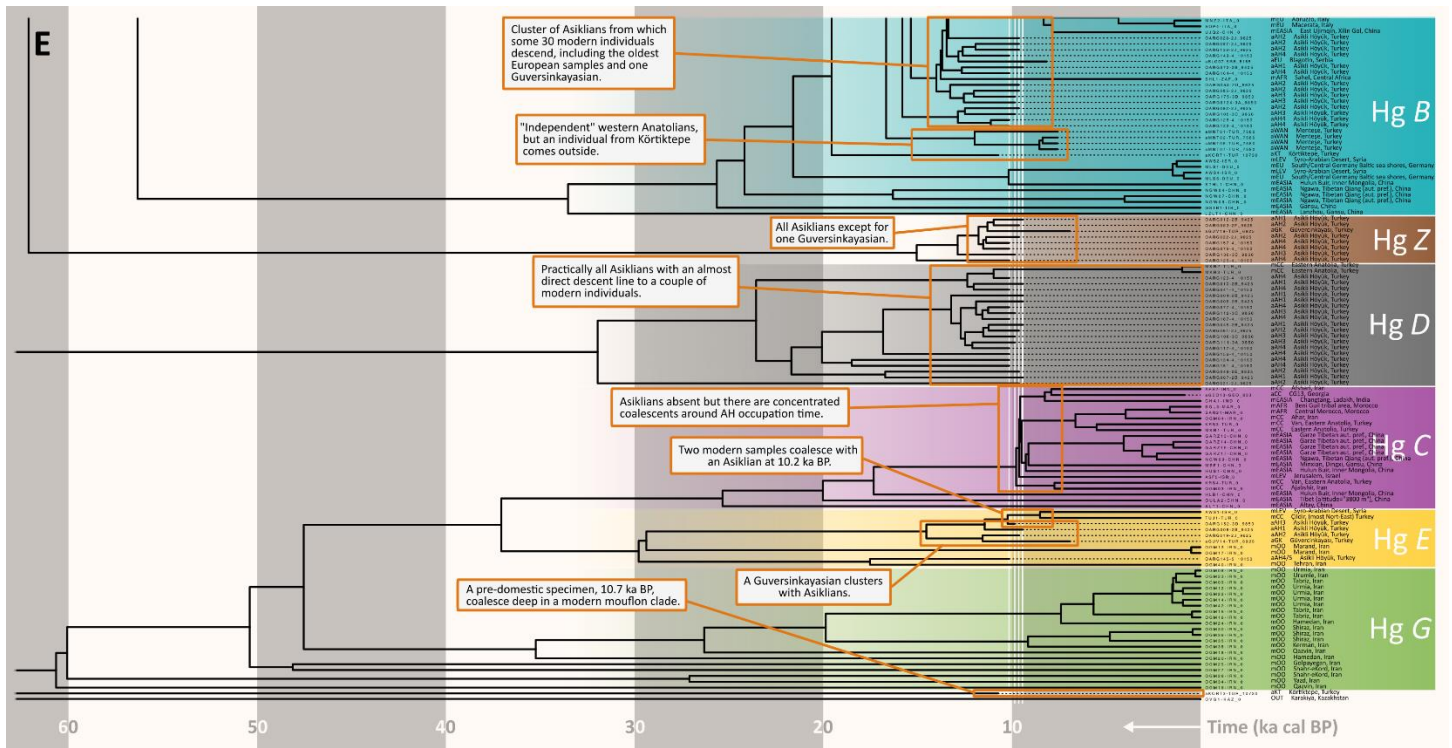

**Fig. S7. Phylogenetic reconstruction, partial.** This corresponds to an expanded view, with labels and comments, of Fig. S3, bottom. White lines indicate the medium time of archaeological layers 2A-C (youngest), 2D-J, 3A-E, & 4A-C (oldest) of Asikli Höyük.

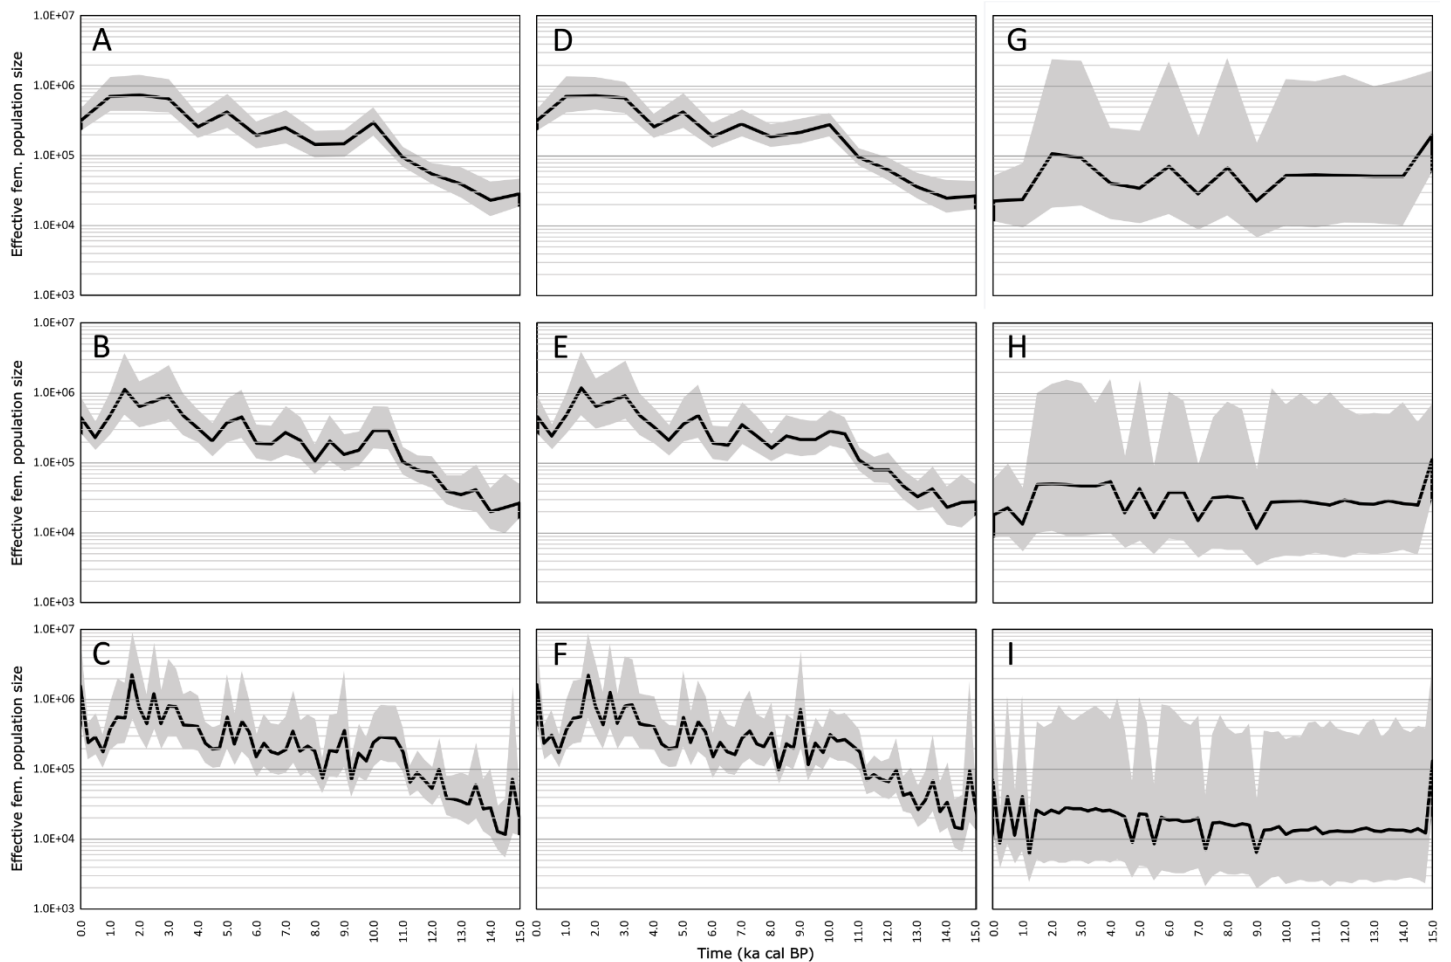

**Fig. S8. Demographic histories inferred from coalescent times.** The histories were made with 16 (top, (A)/(D)/(G)), 32 (middle, (B)/(E)/(H)), or 64 (bottom, (C)/(F)/(I)) time bins. More time bins means that the inferred history has more resolution but more statistical noise while less time bins is more statistically reliable but misses detail. Panels (A)-(C) show the plots obtained analyzing samples of modern and ancient Europe, and the Neolithic sites Aşıklı Höyük, and Körtik Tepe. Panels (D)-(F) show plots made with the samples of the group (A)-(C) plus samples from Neolithic southwestern Anatolia (including Suberde, Çukuriçi, Menteşe, and Marmara regions) and Chalcolithic Güvercinakayaşı. Panels (G)-(I) show the plot obtained with modern mouflon samples. The histories and their 95% HDP region (in grey) were obtained from a MCMC procedure described in Supplementary Text S7.

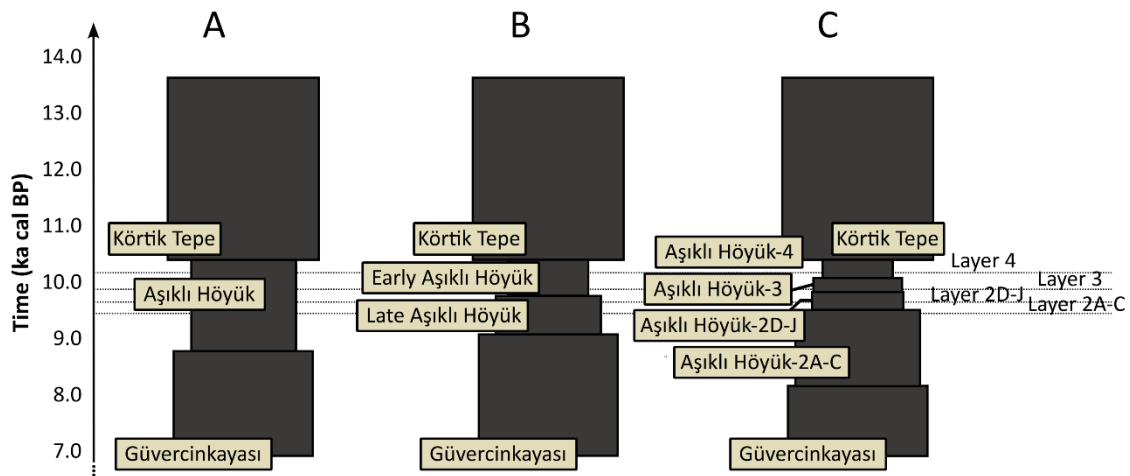

**Fig. S9. Alternative models of the ABC model choice analysis phase 1.** The three showed scenarios correspond to three alternative models representing the demographic history of Aşıklı Höyük: **(A)** a model with no change during the occupation of the site; **(B)** a model with two demographic stages during the occupation of the site (separated around 9.7 ka BP); and **(C)** a model with four stages, each containing one of the four archaeological layers sampled in this study (named at right hand).

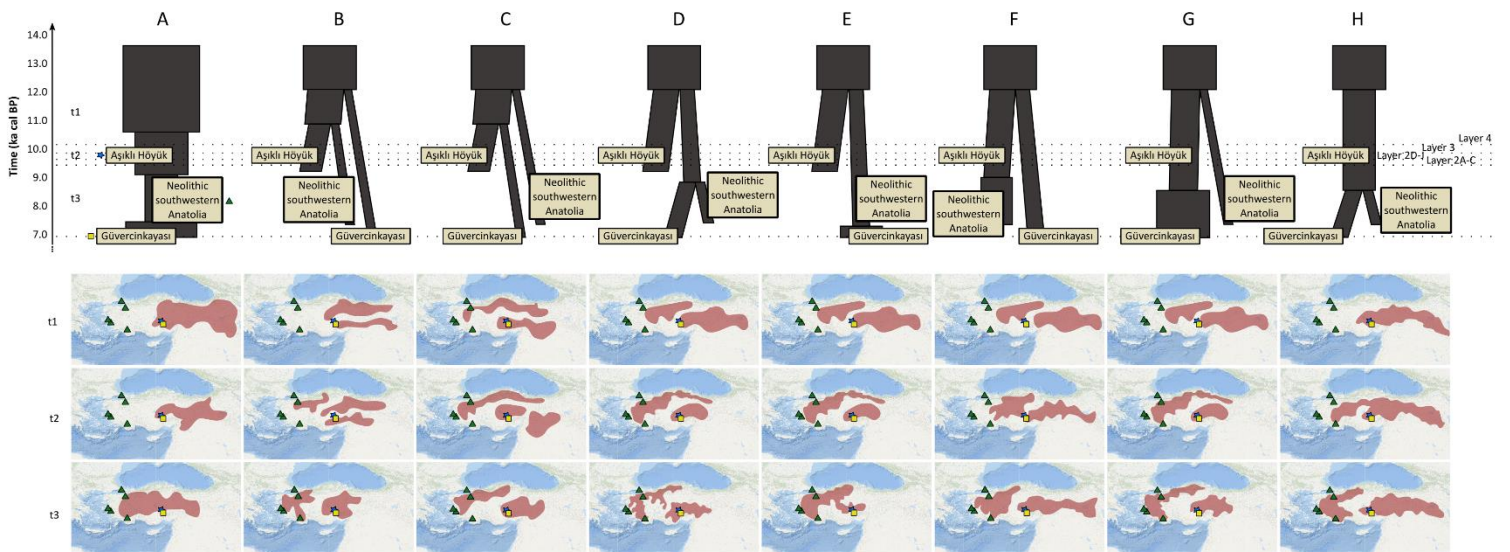

**Fig. S10. Alternative models of the ABC model choice analysis phase 2.** The scenarios represent a non-exhaustive but sensitive set of scenarios modelling the relationships among the populations to which Aşıklı Höyük, Güvercinkayasası and Neolithic southwestern Anatolia belonged to. The mini-map series at the bottom show possible spatial distributions (scarlet shades) of the sampled sheep populations at three time points ( $t_1$ ,  $t_2$ , and  $t_3$ ) to help visualizing the abstract models in a geographical context (by no means they correspond to accurate or inferred distributions). The star, triangle, and square icons in them indicate the locations of Aşıklı Höyük, Güvercinkayasası, and the sites of Neolithic southwestern Anatolia. For a more realistic assessment, consider that unsampled populations may have existed and that each shade could be constituted by a network of human communities with their respective sheep herds.

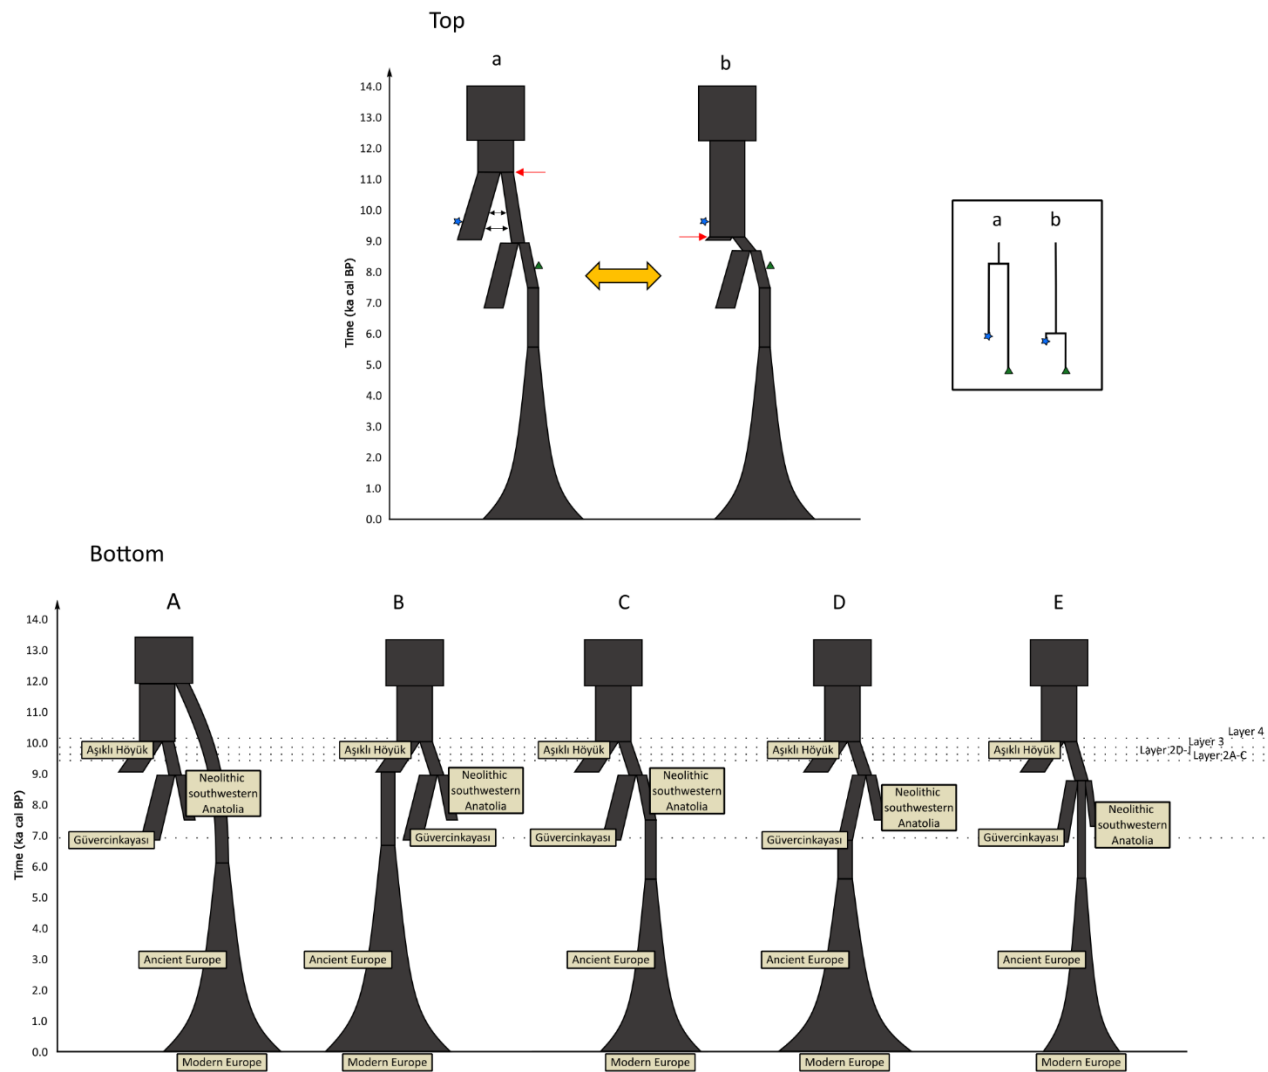

**Fig. S11. Competing models of the ABC model choice analysis phase 3.** The scenarios constitute alternative models of the ancestry relationship between the European population and the (sampled) ancient Anatolian populations. The models (A)-(E) were constructed considering the best model selection of our ABC analysis of phase 2 (Fig. S10) and considering five alternative ancestry relationships of Anatolian populations and the European sheep population (both ancient and modern). Because there were two models selected in the phase 2 (D and H on Fig. S10), we used a flexible base model (top chart) that approaches both models depending on the value of a single parameter: the split time of Aşıklı Höyük and the ancestor of Güvercinkayası and Neolithic southwestern Anatolia (indicated with a red arrow). Notice that, when this time is in the Epipaleolithic, the ancestor of other Anatolian populations is a sister population of Aşıklı Höyük while if the value is younger than the occupation of Aşıklı Höyük, then the other populations descend directly from Aşıklı Höyük. The little asterisk and triangle shapes represent samples from Aşıklı Höyük and Neolithic southwestern Anatolia, respectively, and the scheme in the box shows the expected coalescent diagrams of those samples under both models (identified as ‘a’ and ‘b’). Interestingly, our phylogenetic reconstruction contained both types of coalescences among samples from Aşıklı Höyük and Neolithic southwestern Anatolia.

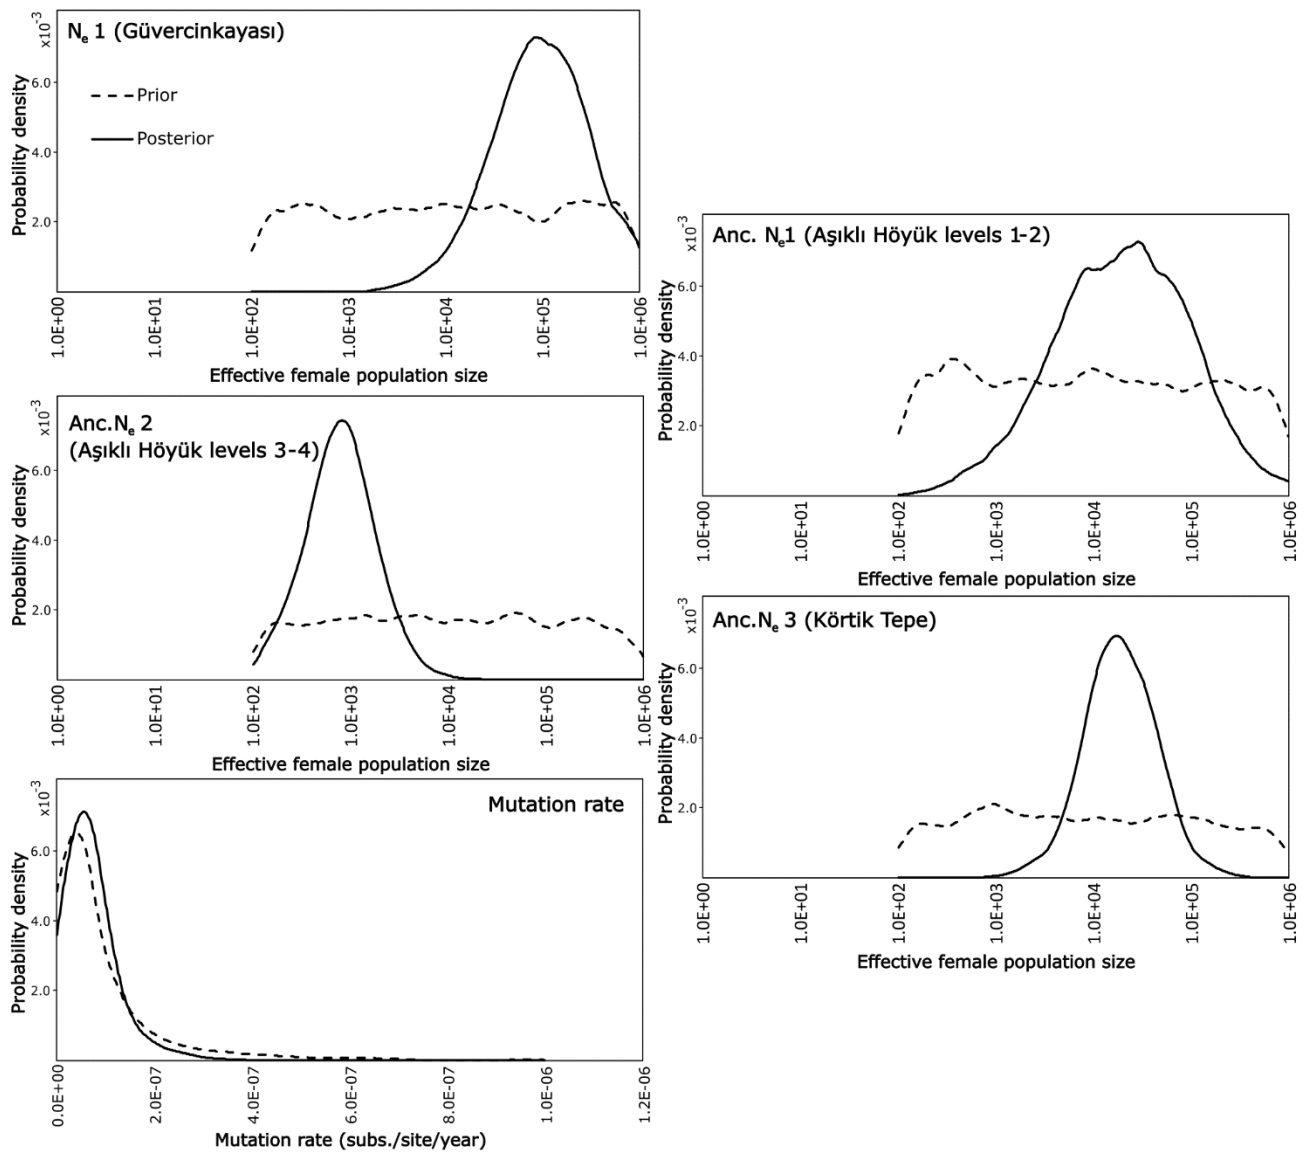

**Fig. S12. Posterior distributions from the ABC analyses phase 1.** The posteriors correspond only to the effective population sizes ( $N_e$ ) and mutation rate of the best supported model (the two-period model) in the model choice analysis phase 1.

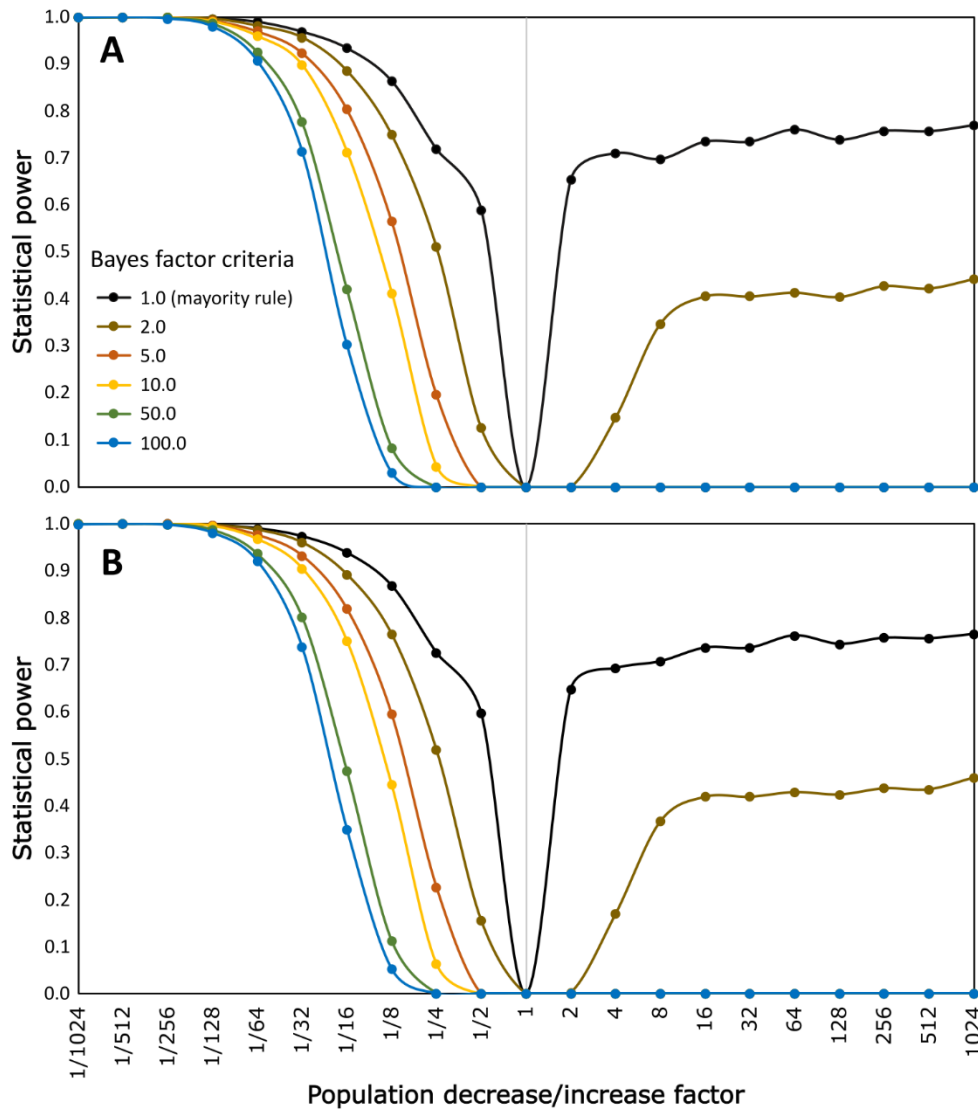

**Fig. S13. Statistical power for bottleneck detection at Asikli-Hoyuk.** The test consisted in a model choice analysis by approximate Bayesian computation (ABC) with two competing models: a model without a change and a model with a population reduction/increase by a factor of 2, 4, 8, 16, 32, 64, 128, 256, 512, or 1024. The charts resulted from estimating the model likelihoods directly from: **(A)** acceptance ratios; or **(B)** with a distance-weighting adjustment by means of an Epanechnikov kernel.



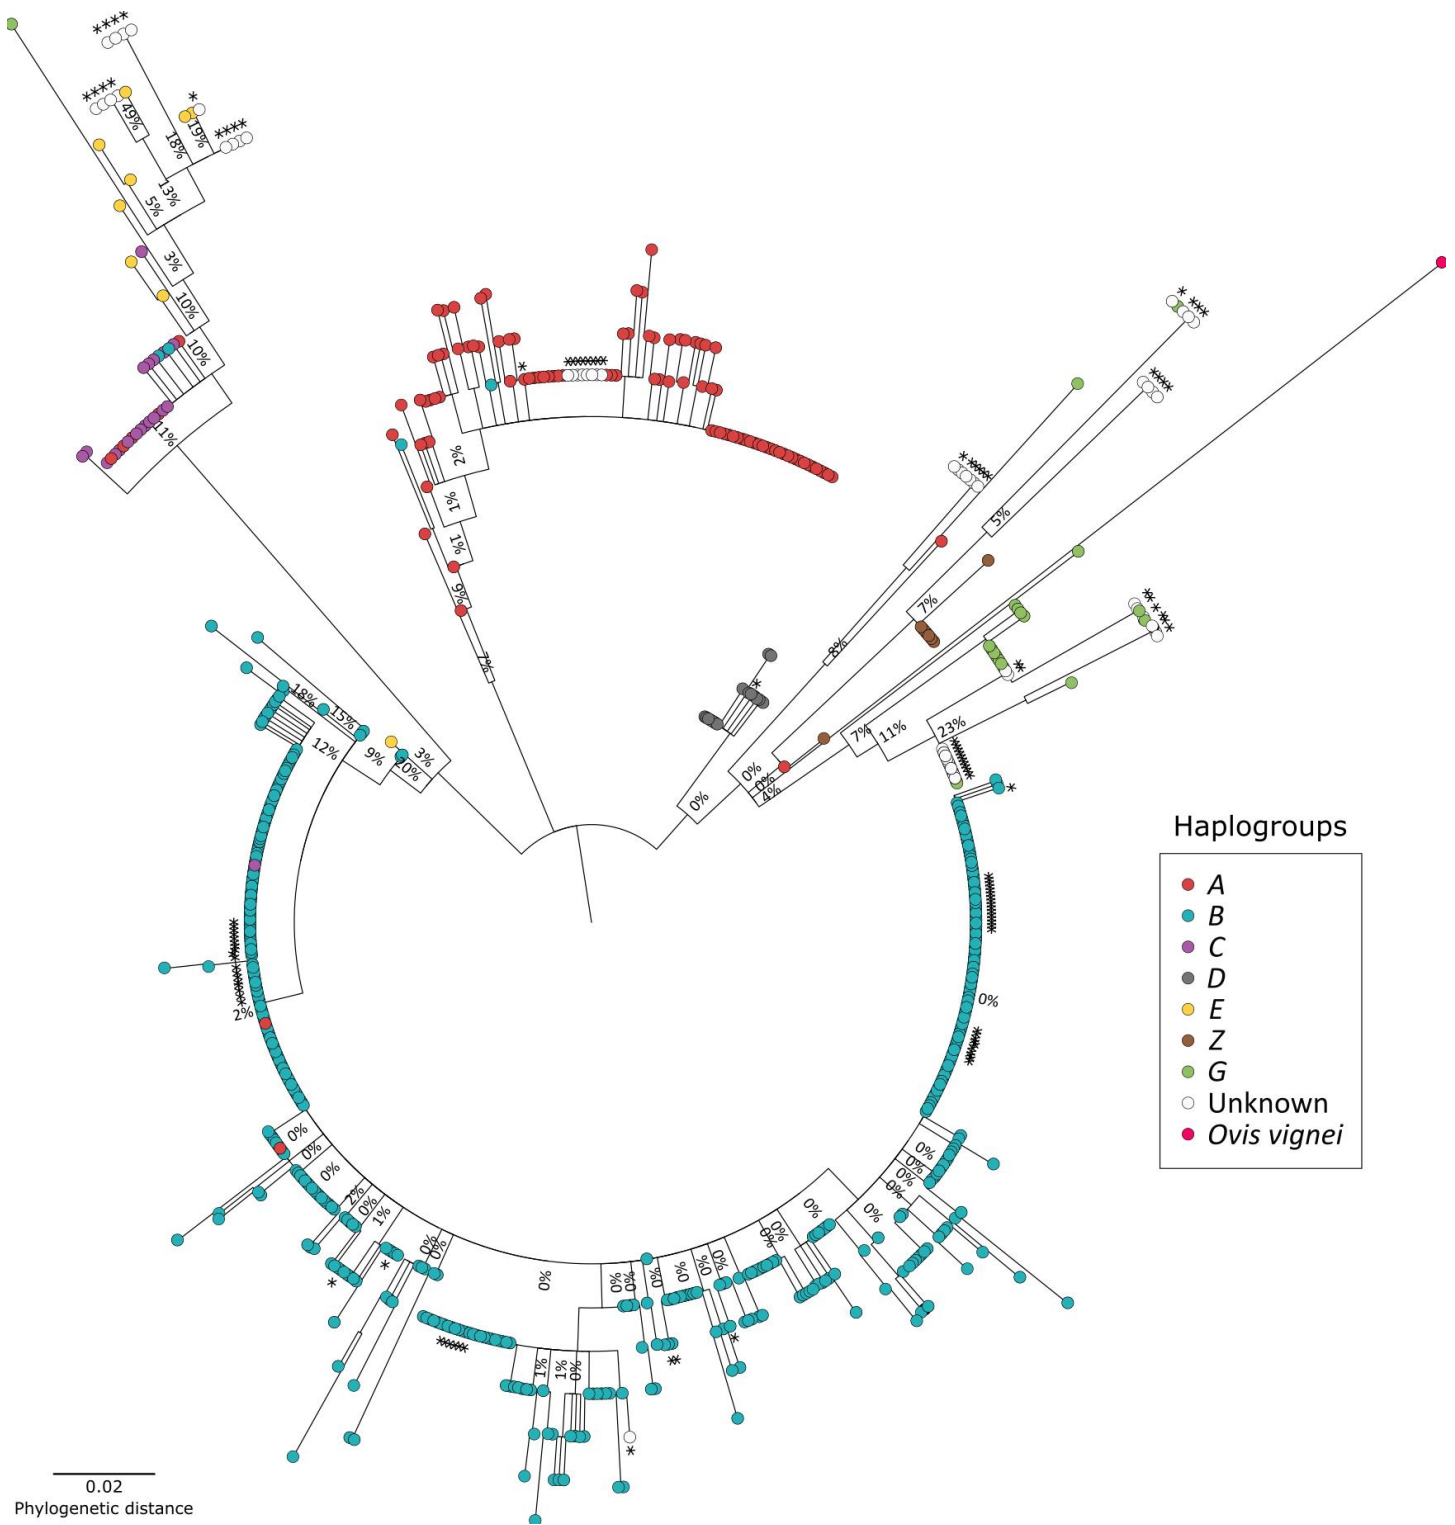

**Fig. S14. Phylogeny of the pooled dataset.** The phylogenetic tree was obtained from a composite dataset including 711 sequences, from which 629 came from downsampling our dataset and adding 82 sequences of a 120 bp fragment of control region published in (41). The tree was inferred by using the Maximum Likelihood method and General Time Reversible model (+G, parameter = 0.7818, +I, 35.00% sites) and 100 bootstrap replicates (branches with <50% support were collapsed). Evolutionary analyses were conducted in MEGA X (65). The asterisks indicate the samples published in (41) and the color correspond to the assignment given in this study. Notice the enrichment of published sequences in the clade where all haplogroup Z are located making it possible that those unidentified published sequences belong to haplogroup Z.

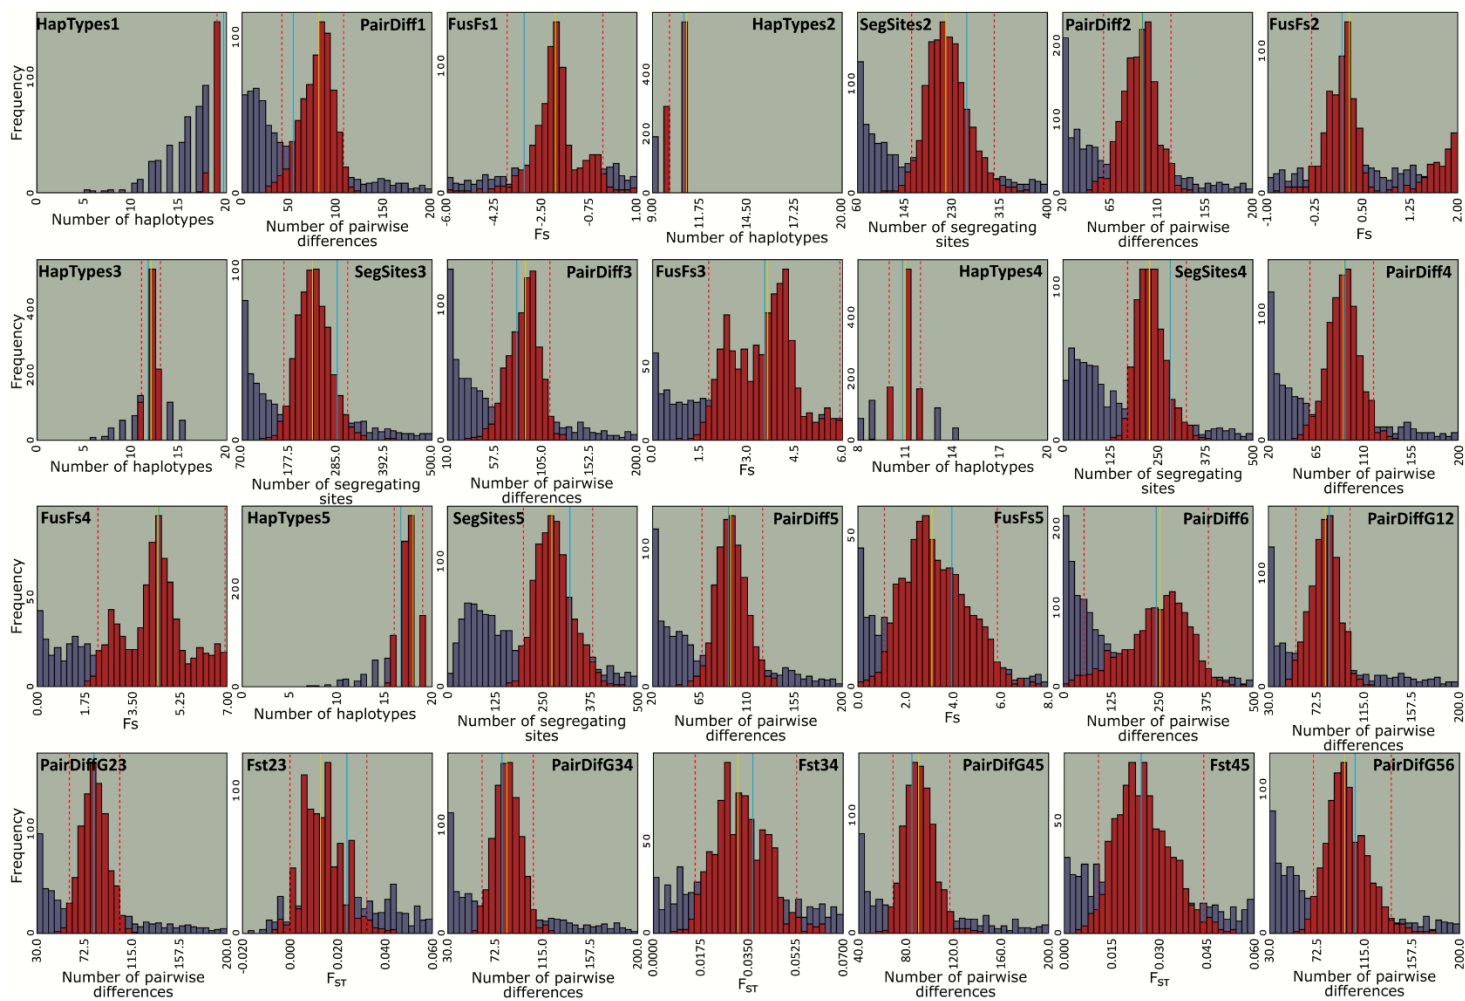

**Fig. S15. Predictive distributions of summary statistics, ABC phase 1.** The predictive distributions of the analysis of 28 summary statistics (“mid set” in Table S8) are shown in red. The distributions in purple correspond to those before rejection. The vertical lines correspond to the empirical value (blue) and the median (yellow). For further information see Tables S7 and S8.

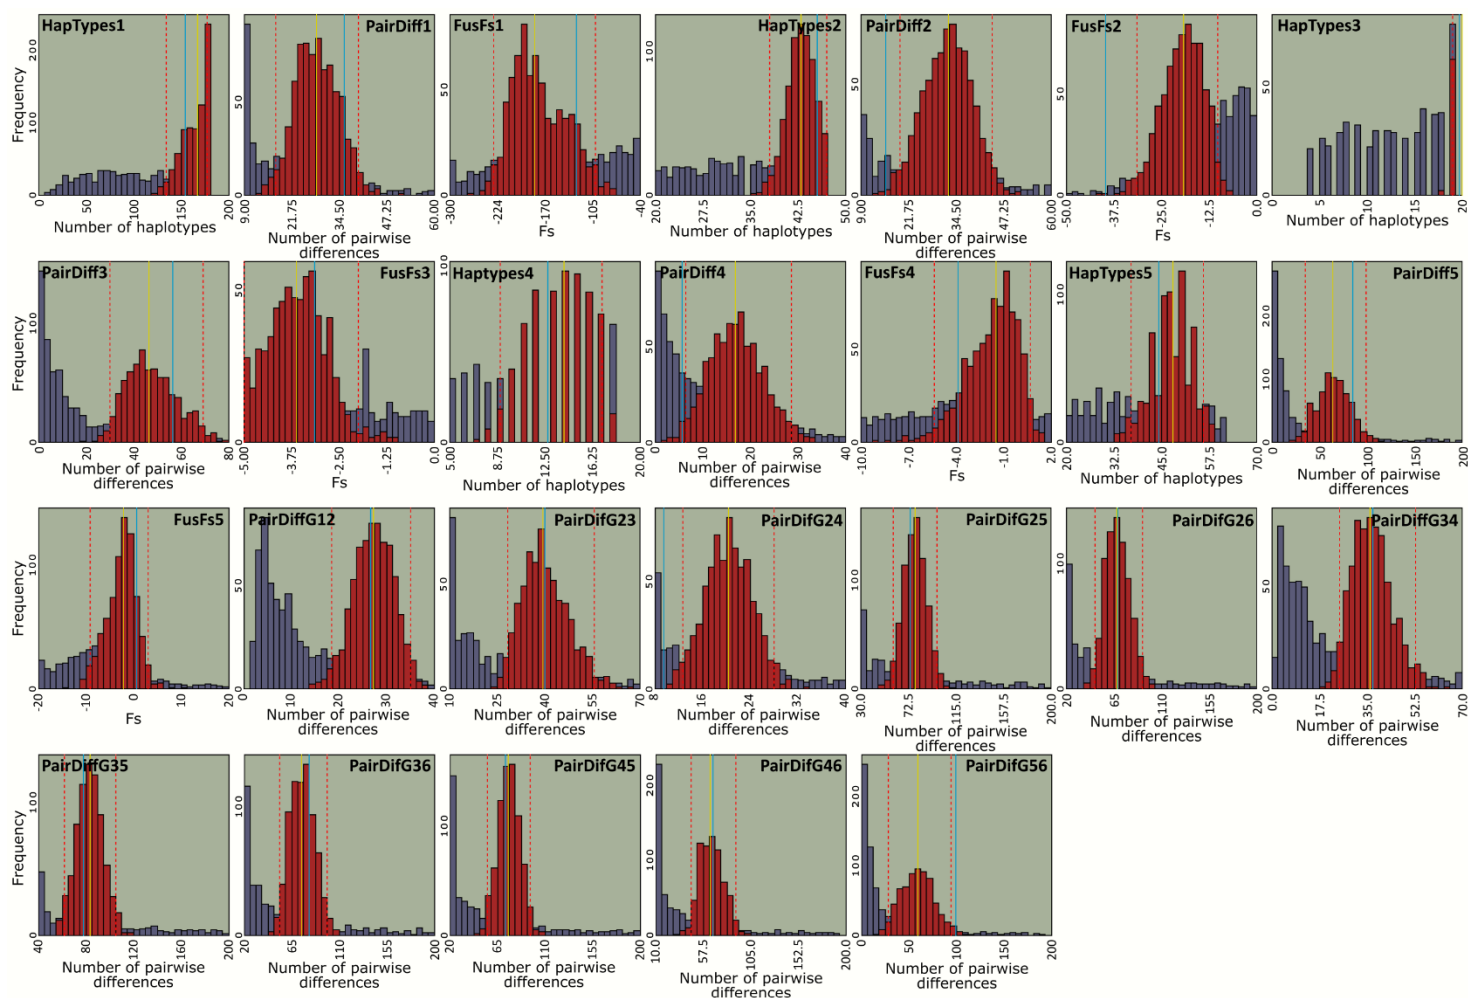

**Fig. S16. Predictive distributions of summary statistics, ABC phase 4.** The predictive distributions of 26 summary statistics (“26-set-F” in Table S12) are shown in red while the purple distributions behind correspond to those before rejection. The vertical lines correspond to the empirical value (blue) and the median (yellow). For further information see Tables S7 and S12.

**Table S1. Composition of animal remains at Aşıklı Höyük.** Contingency chi-square ( $\chi^2$ ) test of the composition of *Ovis sp.*, *Capra sp.*, and other animal remains at Aşıklı Höyük. The tests were performed between consecutive pairs of layers, so the statistic value and the P-value appear in between the rows of the compared layers. The bottom row shows the statistic value and the P-value of the test performed over all layers. The information was taken from (8, 24).

| Layer      | <i>Ovis</i> | <i>Capra</i> | Rest    | <i>n</i> | $\chi^2$ | P-value   |
|------------|-------------|--------------|---------|----------|----------|-----------|
| Phase 2A-C | 0.67455     | 0.19473      | 0.13071 | 12501    |          |           |
|            |             |              |         |          | 345.20   | < 0.00001 |
| Phase 2D-J | 0.68211     | 0.13707      | 0.18082 | 37109    |          |           |
|            |             |              |         |          | 364.15   | < 0.00001 |
| Phase 3A-E | 0.57967     | 0.09550      | 0.32483 | 2863     |          |           |
|            |             |              |         |          | 456.26   | < 0.00001 |
| Phase 4A-C | 0.36586     | 0.13698      | 0.49716 | 14619    |          |           |
|            |             |              |         | Overall  | 7249.3   | < 0.00001 |

**Table S2. Size of sheep carcasses at Aşıklı Höyük.** Two-sample t-test for unequal variances applied to the estimated length of sheep carcasses at Aşıklı Höyük. The tests were performed between consecutive pairs of layers, so the statistic values, degrees of freedom (d.f.), and P-values appear in between the rows of the compared layers. The information was taken from (24).

| Layer      | Mean    | Variance | <i>n</i> | <i>t</i> | d.f. | P-value (one-tail) | P-value (two-tail) |
|------------|---------|----------|----------|----------|------|--------------------|--------------------|
| Phase 2A-C | 20.5638 | 1.3758   | 221      |          |      |                    |                    |
|            |         |          |          | 2.6250   | 410  | 0.00449            | 0.00899            |
| Phase 2D-J | 20.3177 | 1.3472   | 525      |          |      |                    |                    |
|            |         |          |          | 0.1496   | 79   | 0.44643            | 0.89285            |
| Phase 3A-E | 20.2927 | 2.2018   | 69       |          |      |                    |                    |
|            |         |          |          | -2.8626  | 151  | 0.00240            | 0.00480            |
| Phase 4A-C | 20.9740 | 2.1701   | 96       |          |      |                    |                    |

**Table S3. Joint pathologies at Aşıklı Höyük.** Two-sample t-test for unequal variances applied to the classification of the severity of joint pathologies (1=nonpathological, 4=maximum severity) of sheep remains at Aşıklı Höyük. The tests were performed between pairs of layers, so the statistic values, degrees of freedom (d.f.), and P-values appear in between the rows of the compared layers. The information was taken from (24, 25).

| Layer      | Mean   | Variance | <i>n</i> | <i>t</i> | d.f. | P-value (one-tail) | P-value (two-tail) |
|------------|--------|----------|----------|----------|------|--------------------|--------------------|
| Phase 2A-C | 1.7840 | 1.1210   | 287      |          |      |                    |                    |
|            |        |          |          | -1.1079  | 617  | 0.13417            | 0.26833            |
| Phase 2D-J | 1.8763 | 1.1329   | 372      |          |      |                    |                    |
|            |        |          |          | 0.3932   | 101  | 0.34749            | 0.69498            |
| Phase 3A-E | 1.8219 | 1.1762   | 73       |          |      |                    |                    |
|            |        |          |          | 1.9750   | 129  | 0.02520            | 0.05041            |
| Phase 4A-C | 1.4746 | 0.8743   | 59       |          |      |                    |                    |

**Table S4. Origin of the samples included in this study.** The origin of Anatolian ancient samples is indicated specifically as archaeological site or region whereas samples outside southwestern Asia are only indicated at regional or continental scale due to their more scattered presence. Samples indicated as published include mitogenomes extracted from whole genome-sequencing data available in public databases and mitogenomes available in the GenBank. See further details in Table S5.

| Origin                                | Type    | <i>n</i> | This Study | Published |       |
|---------------------------------------|---------|----------|------------|-----------|-------|
|                                       |         |          |            | WGS       | mtDNA |
| Europe                                | Ancient | 47       | 45         | 2         |       |
| Neolithic southwestern Anatolia       | Ancient | 18       | 18         |           |       |
| Caucasus                              | Ancient | 14       | 14         |           |       |
| Levant                                | Ancient | 10       | 10         |           |       |
| Asikli Höyük                          | Ancient | 62       | 62         |           |       |
| Güvercin kayası                       | Ancient | 20       | 20         |           |       |
| Körkit Tepe                           | Ancient | 2        | 2          |           |       |
| Africa                                | Modern  | 94       |            | 92        | 2     |
| Europe                                | Modern  | 177      | 107        | 22        | 48    |
| Anatolia                              | Modern  | 3        |            | 3         |       |
| Caucasus                              | Modern  | 59       | 28         | 13        | 18    |
| Levant                                | Modern  | 11       |            | 5         | 6     |
| Eastern Asia                          | Modern  | 87       | 12         | 13        | 62    |
| Asiatic mouflon ( <i>O. gmelini</i> ) | Modern  | 24       |            | 24        |       |
| Outgroup ( <i>O. vignei</i> )         | Modern  | 1        |            |           | 1     |
| Total                                 | Ancient | 173      | 171        | 2         | 0     |
| Total                                 | Modern  | 456      | 147        | 172       | 137   |
| Overall                               |         | 629      |            |           |       |

**Table S5. List of samples included in this study.** This table show the full list of the 629 samples analyzed in this study along with their label, accession number, species, haplogroup, and sample code indicating the population in which they were grouped for analysis. The list also shows the estimated age and location data including coordinates and geographical origin that included each of the 163 localities of modern sheep and 33 localities for ancient specimens. The column “reference” also provides the source of the samples indicating the study where they were first published (name-date for easier identification) or whether they were sequenced *de novo* in this study, or retrieved from the sequence read archive (SRA: available at <https://www.ncbi.nlm.nih.gov/sra>). The alignment containing the full mitogenomic dataset is available at: 10.6084/m9.figshare.24552790.

| #  | ID          | Accession ID | Species             | Origin                               | Age | lat    | long   | Reference       | Hg | Sample Code |
|----|-------------|--------------|---------------------|--------------------------------------|-----|--------|--------|-----------------|----|-------------|
| 1  | OVG1-KAZ    | HM236186.1   | <i>Ovis vignei</i>  | Karakiya, Kazakhstan                 | 0   | 42.99  | 54.55  | (31)            | U  | OUT         |
| 2  | OGM08-IRN   | ERS154529    | <i>Ovis gmelini</i> | Urmia, Iran                          | 0   | 37.485 | 45.653 | SRA             | G  | mOO         |
| 3  | OGM09-IRN   | ERS154532    | <i>Ovis gmelini</i> | Tabriz, Iran                         | 0   | 37.855 | 46.570 | SRA             | G  | mOO         |
| 4  | OGM12-IRN   | ERS154530    | <i>Ovis gmelini</i> | Urmia, Iran                          | 0   | 37.485 | 45.653 | SRA             | G  | mOO         |
| 5  | OGM13-IRN   | ERS154526    | <i>Ovis gmelini</i> | Marand, Iran                         | 0   | 38.932 | 45.385 | SRA             | E  | mOO         |
| 6  | OGM14-IRN   | ERS154527    | <i>Ovis gmelini</i> | Urmia, Iran                          | 0   | 37.481 | 45.628 | SRA             | G  | mOO         |
| 7  | OGM15-IRN   | ERS154533    | <i>Ovis gmelini</i> | Tabriz, Iran                         | 0   | 38.769 | 46.147 | SRA             | G  | mOO         |
| 8  | OGM16-IRN   | ERS154531    | <i>Ovis gmelini</i> | Tabriz, Iran                         | 0   | 37.747 | 46.393 | SRA             | G  | mOO         |
| 9  | OGM17-IRN   | ERS419579    | <i>Ovis gmelini</i> | Marand, Iran                         | 0   | 38.746 | 45.458 | SRA             | E  | mOO         |
| 10 | OGM18-IRN   | ERS419580    | <i>Ovis gmelini</i> | Qazvin, Iran                         | 0   | 36.611 | 49.117 | SRA             | G  | mOO         |
| 11 | OGM19-IRN   | ERS239062    | <i>Ovis gmelini</i> | Qazvin, Iran                         | 0   | 36.721 | 49.321 | SRA             | G  | mOO         |
| 12 | OGM20-IRN   | ERS239061    | <i>Ovis gmelini</i> | Hamedan, Iran                        | 0   | 34.643 | 48.622 | SRA             | G  | mOO         |
| 13 | OGM22-IRN   | ERS239058    | <i>Ovis gmelini</i> | Urmia, Iran                          | 0   | 37.485 | 45.599 | SRA             | G  | mOO         |
| 14 | OGM23-IRN   | ERS239059    | <i>Ovis gmelini</i> | Urumie, Iran                         | 0   | 37.487 | 45.637 | SRA             | G  | mOO         |
| 15 | OGM24-IRN   | ERS239060    | <i>Ovis gmelini</i> | Hamedan, Iran                        | 0   | 34.705 | 48.863 | SRA             | G  | mOO         |
| 16 | OGM25-IRN   | ERS239063    | <i>Ovis gmelini</i> | Golpayegan, Iran                     | 0   | 33.697 | 50.804 | SRA             | G  | mOO         |
| 17 | OGM26-IRN   | SRR11657635  | <i>Ovis gmelini</i> | Shahr-eKord, Iran                    | 0   | 32.230 | 50.470 | (36)            | G  | mOO         |
| 18 | OGM27-IRN   | SRR11657636  | <i>Ovis gmelini</i> | Shahr-eKord, Iran                    | 0   | 32.230 | 50.470 | (36)            | G  | mOO         |
| 19 | OGM30-IRN   | SRR11657501  | <i>Ovis gmelini</i> | Shiraz, Iran                         | 0   | 29.587 | 52.527 | (36)            | G  | mOO         |
| 20 | OGM34-IRN   | SRR11657505  | <i>Ovis gmelini</i> | Yazd, Iran                           | 0   | 31.880 | 54.357 | (36)            | G  | mOO         |
| 21 | OGM35-IRN   | SRR11657506  | <i>Ovis gmelini</i> | Shiraz, Iran                         | 0   | 29.587 | 52.527 | (36)            | G  | mOO         |
| 22 | OGM36-IRN   | SRR11657507  | <i>Ovis gmelini</i> | Shiraz, Iran                         | 0   | 29.587 | 52.527 | (36)            | G  | mOO         |
| 23 | OGM38-IRN   | SRR11657639  | <i>Ovis gmelini</i> | Kerman, Iran                         | 0   | 30.286 | 57.079 | (36)            | G  | mOO         |
| 24 | OGM40-IRN   | SRR11657641  | <i>Ovis gmelini</i> | Tehran, Iran                         | 0   | 35.580 | 51.447 | (36)            | E  | mOO         |
| 25 | OGM42-IRN   | ERS154528    | <i>Ovis gmelini</i> | Urmia, Iran                          | 0   | 37.490 | 45.599 | SRA             | G  | mOO         |
| 26 | SKD1-Baltic | 24552790***  | <i>Ovis aries</i>   | Skuodas, Lithuania                   | 0   | 56.27  | 21.52  | This study, PCR | B  | mEU         |
| 27 | SKD2-Baltic | 24552790***  | <i>Ovis aries</i>   | Skuodas, Lithuania                   | 0   | 56.27  | 21.52  | This study, PCR | B  | mEU         |
| 28 | SKD3-Baltic | 24552790***  | <i>Ovis aries</i>   | Skuodas, Lithuania                   | 0   | 56.27  | 21.52  | This study, PCR | B  | mEU         |
| 29 | PKUP1-BIH   | 24552790***  | <i>Ovis aries</i>   | Kupres, Bosnia and Herzegovina       | 0   | 43.99  | 17.28  | This study, PCR | A  | mEU         |
| 30 | PKUP2-BIH   | 24552790***  | <i>Ovis aries</i>   | Kupres, Bosnia and Herzegovina       | 0   | 43.99  | 17.28  | This study, PCR | B  | mEU         |
| 31 | PPRI1-BIH   | 24552790***  | <i>Ovis aries</i>   | Gornji Vakuf, Bosnia and Herzegovina | 0   | 43.96  | 17.68  | This study, PCR | B  | mEU         |
| 32 | PPRI2-BIH   | 24552790***  | <i>Ovis aries</i>   | Gornji Vakuf, Bosnia and Herzegovina | 0   | 43.96  | 17.68  | This study, PCR | B  | mEU         |
| 33 | PSTO1-BIH   | 24552790***  | <i>Ovis aries</i>   | Stolac, Bosnia and Herzegovina       | 0   | 43.09  | 17.96  | This study, PCR | B  | mEU         |
| 34 | PSTO2-BIH   | 24552790***  | <i>Ovis aries</i>   | Stolac, Bosnia and Herzegovina       | 0   | 43.09  | 17.96  | This study, PCR | B  | mEU         |
| 35 | PTRA1-BIH   | 24552790***  | <i>Ovis aries</i>   | Travnik, Bosnia and Herzegovina      | 0   | 44.23  | 17.66  | This study, PCR | B  | mEU         |
| 36 | PTRA2-BIH   | 24552790***  | <i>Ovis aries</i>   | Travnik, Bosnia and Herzegovina      | 0   | 44.23  | 17.66  | This study, PCR | B  | mEU         |
| 37 | PTRA3-BIH   | 24552790***  | <i>Ovis aries</i>   | Travnik, Bosnia and Herzegovina      | 0   | 44.23  | 17.66  | This study, PCR | B  | mEU         |
| 38 | PTRA4-BIH   | 24552790***  | <i>Ovis aries</i>   | Travnik, Bosnia and Herzegovina      | 0   | 44.23  | 17.66  | This study, PCR | B  | mEU         |
| 39 | SMS1-CHE    | SRS335692    | <i>Ovis aries</i>   | Prättigau, Switzerland               | 0   | 46.95  | 9.75   | SRA             | B  | mEU         |
| 40 | VBN1-CHE    | 24552790***  | <i>Ovis aries</i>   | Valais, Switzerland                  | 0   | 46.20  | 7.60   | This study, PCR | B  | mEU         |
| 41 | VBN2-CHE    | 24552790***  | <i>Ovis aries</i>   | Valais, Switzerland                  | 0   | 46.20  | 7.60   | This study, PCR | B  | mEU         |
| 42 | VBN3-CHE    | 24552790***  | <i>Ovis aries</i>   | Valais, Switzerland                  | 0   | 46.20  | 7.60   | This study, PCR | B  | mEU         |



|     |           |             |                   |                                |   |       |       |                 |   |     |
|-----|-----------|-------------|-------------------|--------------------------------|---|-------|-------|-----------------|---|-----|
| 43  | CRS1-HRV  | 24552790*** | <i>Ovis aries</i> | Cres, Croatia                  | 0 | 44.86 | 14.39 | This study, PCR | B | mEU |
| 44  | CRS2-HRV  | 24552790*** | <i>Ovis aries</i> | Cres, Croatia                  | 0 | 44.86 | 14.39 | This study, PCR | B | mEU |
| 45  | KORS1-HRV | 24552790*** | <i>Ovis aries</i> | Kornati, Croatia               | 0 | 43.81 | 15.31 | This study, PCR | B | mEU |
| 46  | KORS2-HRV | 24552790*** | <i>Ovis aries</i> | Kornati, Croatia               | 0 | 43.81 | 15.31 | This study, PCR | B | mEU |
| 47  | KRKS1-HRV | 24552790*** | <i>Ovis aries</i> | Krk, Croatia                   | 0 | 45.08 | 14.59 | This study, PCR | B | mEU |
| 48  | KRKS2-HRV | 24552790*** | <i>Ovis aries</i> | Krk, Croatia                   | 0 | 45.08 | 14.59 | This study, PCR | B | mEU |
| 49  | KRKS3-HRV | 24552790*** | <i>Ovis aries</i> | Krk, Croatia                   | 0 | 45.08 | 14.59 | This study, PCR | B | mEU |
| 50  | PDAL1-HRV | 24552790*** | <i>Ovis aries</i> | Dalmatia, Croatia              | 0 | 44.11 | 15.23 | This study, PCR | B | mEU |
| 51  | PDAL2-HRV | 24552790*** | <i>Ovis aries</i> | Dalmatia, Croatia              | 0 | 44.11 | 15.23 | This study, PCR | B | mEU |
| 52  | BNT1-DEU  | 24552790*** | <i>Ovis aries</i> | Bentheim, Germany              | 0 | 52.50 | 7.05  | This study, PCR | B | mEU |
| 53  | BNT2-DEU  | 24552790*** | <i>Ovis aries</i> | Bentheim, Germany              | 0 | 52.50 | 7.05  | This study, PCR | B | mEU |
| 54  | BNT3-DEU  | 24552790*** | <i>Ovis aries</i> | Bentheim, Germany              | 0 | 52.50 | 7.05  | This study, PCR | B | mEU |
| 55  | BNT4-DEU  | 24552790*** | <i>Ovis aries</i> | Bentheim, Germany              | 0 | 52.50 | 7.05  | This study, PCR | B | mEU |
| 56  | CBR1-DEU  | 24552790*** | <i>Ovis aries</i> | Coburg, Germany                | 0 | 50.27 | 10.96 | This study, PCR | B | mEU |
| 57  | CBR2-DEU  | 24552790*** | <i>Ovis aries</i> | Coburg, Germany                | 0 | 50.27 | 10.96 | This study, PCR | A | mEU |
| 58  | CBR3-DEU  | 24552790*** | <i>Ovis aries</i> | Coburg, Germany                | 0 | 50.27 | 10.96 | This study, PCR | B | mEU |
| 59  | CBR4-DEU  | 24552790*** | <i>Ovis aries</i> | Coburg, Germany                | 0 | 50.27 | 10.96 | This study, PCR | B | mEU |
| 60  | EFW1-DEU  | 24552790*** | <i>Ovis aries</i> | East Frisia, Germany           | 0 | 53.23 | 7.47  | This study, PCR | B | mEU |
| 61  | EFW2-DEU  | 24552790*** | <i>Ovis aries</i> | East Frisia, Germany           | 0 | 53.23 | 7.47  | This study, PCR | A | mEU |
| 62  | EFW3-DEU  | 24552790*** | <i>Ovis aries</i> | East Frisia, Germany           | 0 | 53.23 | 7.47  | This study, PCR | A | mEU |
| 63  | EFW4-DEU  | 24552790*** | <i>Ovis aries</i> | East Frisia, Germany           | 0 | 53.23 | 7.47  | This study, PCR | A | mEU |
| 64  | GBHM1-DEU | 24552790*** | <i>Ovis aries</i> | Northrhine-Westphalia, Germany | 0 | 51.54 | 7.48  | This study, PCR | B | mEU |
| 65  | GBHM2-DEU | 24552790*** | <i>Ovis aries</i> | Northrhine-Westphalia, Germany | 0 | 51.54 | 7.48  | This study, PCR | B | mEU |
| 66  | GBHM3-DEU | 24552790*** | <i>Ovis aries</i> | Northrhine-Westphalia, Germany | 0 | 51.54 | 7.48  | This study, PCR | B | mEU |
| 67  | GBHM4-DEU | 24552790*** | <i>Ovis aries</i> | Northrhine-Westphalia, Germany | 0 | 51.54 | 7.48  | This study, PCR | B | mEU |
| 68  | GBRM1-DEU | 24552790*** | <i>Ovis aries</i> | Bavaria, Germany               | 0 | 49.04 | 11.33 | This study, PCR | B | mEU |
| 69  | GBRM2-DEU | 24552790*** | <i>Ovis aries</i> | Bavaria, Germany               | 0 | 49.04 | 11.33 | This study, PCR | B | mEU |
| 70  | GBRM3-DEU | 24552790*** | <i>Ovis aries</i> | Bavaria, Germany               | 0 | 49.04 | 11.33 | This study, PCR | B | mEU |
| 71  | GBRM4-DEU | 24552790*** | <i>Ovis aries</i> | Bavaria, Germany               | 0 | 49.04 | 11.33 | This study, PCR | B | mEU |
| 72  | GHS1-DEU  | 24552790*** | <i>Ovis aries</i> | Lüneburger Heide, Germany      | 0 | 53.17 | 9.92  | This study, PCR | A | mEU |
| 73  | GHS2-DEU  | 24552790*** | <i>Ovis aries</i> | Lüneburger Heide, Germany      | 0 | 53.17 | 9.92  | This study, PCR | B | mEU |
| 74  | GHS3-DEU  | 24552790*** | <i>Ovis aries</i> | Lüneburger Heide, Germany      | 0 | 53.17 | 9.92  | This study, PCR | B | mEU |
| 75  | GHS4-DEU  | 24552790*** | <i>Ovis aries</i> | Lüneburger Heide, Germany      | 0 | 53.17 | 9.92  | This study, PCR | B | mEU |
| 76  | MLS1-DEU  | AF010406.1  | <i>Ovis aries</i> | South/Central Germany          | 0 | 49.04 | 11.33 | (33)            | B | mEU |
| 77  | MLS2-DEU  | 24552790*** | <i>Ovis aries</i> | South/Central Germany          | 0 | 49.04 | 11.33 | This study, PCR | B | mEU |
| 78  | MLS3-DEU  | 24552790*** | <i>Ovis aries</i> | South/Central Germany          | 0 | 49.04 | 11.33 | This study, PCR | B | mEU |
| 79  | MLS4-DEU  | 24552790*** | <i>Ovis aries</i> | South/Central Germany          | 0 | 49.04 | 11.33 | This study, PCR | B | mEU |
| 80  | MLS5-DEU  | 24552790*** | <i>Ovis aries</i> | South/Central Germany          | 0 | 49.04 | 11.33 | This study, PCR | B | mEU |
| 81  | MLS6-DEU  | NC_001941.1 | <i>Ovis aries</i> | South/Central Germany          | 0 | 49.04 | 11.33 | (33)            | B | mEU |
| 82  | PMC1-DEU  | 24552790*** | <i>Ovis aries</i> | Baltic sea shores, Germany     | 0 | 54.40 | 13.36 | This study, PCR | B | mEU |
| 83  | PMC2-DEU  | 24552790*** | <i>Ovis aries</i> | Baltic sea shores, Germany     | 0 | 54.40 | 13.36 | This study, PCR | A | mEU |
| 84  | PMC3-DEU  | 24552790*** | <i>Ovis aries</i> | Baltic sea shores, Germany     | 0 | 54.40 | 13.36 | This study, PCR | B | mEU |
| 85  | RHN1-DEU  | 24552790*** | <i>Ovis aries</i> | Rhoen, Germany                 | 0 | 50.47 | 10.07 | This study, PCR | B | mEU |
| 86  | RHN2-DEU  | 24552790*** | <i>Ovis aries</i> | Rhoen, Germany                 | 0 | 50.47 | 10.07 | This study, PCR | B | mEU |
| 87  | RHN3-DEU  | 24552790*** | <i>Ovis aries</i> | Rhoen, Germany                 | 0 | 50.47 | 10.07 | This study, PCR | B | mEU |
| 88  | RHN4-DEU  | 24552790*** | <i>Ovis aries</i> | Rhoen, Germany                 | 0 | 50.47 | 10.07 | This study, PCR | B | mEU |
| 89  | SRP1-GBR  | 24552790*** | <i>Ovis aries</i> | Shropshire, UK                 | 0 | 52.67 | -2.80 | This study, PCR | B | mEU |
| 90  | SRP2-GBR  | 24552790*** | <i>Ovis aries</i> | Shropshire, UK                 | 0 | 52.67 | -2.80 | This study, PCR | B | mEU |
| 91  | SRP3-GBR  | 24552790*** | <i>Ovis aries</i> | Shropshire, UK                 | 0 | 52.67 | -2.80 | This study, PCR | B | mEU |
| 92  | SRP4-GBR  | 24552790*** | <i>Ovis aries</i> | Shropshire, UK                 | 0 | 52.67 | -2.80 | This study, PCR | B | mEU |
| 93  | SUF01-GBR | 24552790*** | <i>Ovis aries</i> | Suffolk, UK                    | 0 | 52.23 | 1.02  | This study, PCR | B | mEU |
| 94  | SUF02-GBR | 24552790*** | <i>Ovis aries</i> | Suffolk, UK                    | 0 | 52.23 | 1.02  | This study, PCR | B | mEU |
| 95  | SUF03-GBR | 24552790*** | <i>Ovis aries</i> | Suffolk, UK                    | 0 | 52.23 | 1.02  | This study, PCR | B | mEU |
| 96  | SUF04-GBR | 24552790*** | <i>Ovis aries</i> | Suffolk, UK                    | 0 | 52.23 | 1.02  | This study, PCR | B | mEU |
| 97  | MER1-AUS  | HM236174.1  | <i>Ovis aries</i> | Extremadura, Spain             | 0 | 39.21 | -6.11 | (31)            | A | mEU |
| 98  | AAL1-FIN  | KF938342.1  | <i>Ovis aries</i> | Åland, Finland                 | 0 | 60.08 | 19.93 | (30)            | A | mEU |
| 99  | FIN1-FIN  | KF938354.1  | <i>Ovis aries</i> | Helsinki, Finland              | 0 | 60.16 | 24.92 | (30)            | B | mEU |
| 100 | FIN2-FIN  | KF938355.1  | <i>Ovis aries</i> | Helsinki, Finland              | 0 | 60.16 | 24.92 | (30)            | B | mEU |

|     |           |             |                   |                                           |   |       |       |                 |   |     |
|-----|-----------|-------------|-------------------|-------------------------------------------|---|-------|-------|-----------------|---|-----|
| 101 | FIN3-FIN  | SRS335716   | <i>Ovis aries</i> | Helsinki, Finland                         | 0 | 60.16 | 24.92 | SRA             | B | mEU |
| 102 | FND1-FIN  | EF490451.1  | <i>Ovis aries</i> | Helsinki, Finland                         | 0 | 60.16 | 24.92 | (34)            | B | mEU |
| 103 | FND2-FIN  | EF490452.1  | <i>Ovis aries</i> | Helsinki, Finland                         | 0 | 60.16 | 24.92 | (34)            | B | mEU |
| 104 | FND3-FIN  | EF490453.1  | <i>Ovis aries</i> | Helsinki, Finland                         | 0 | 60.16 | 24.92 | (34)            | B | mEU |
| 105 | FND4-FIN  | EF490454.1  | <i>Ovis aries</i> | Helsinki, Finland                         | 0 | 60.16 | 24.92 | (34)            | B | mEU |
| 106 | FND5-FIN  | EF490455.1  | <i>Ovis aries</i> | Helsinki, Finland                         | 0 | 60.16 | 24.92 | (34)            | B | mEU |
| 107 | KNG1-FIN  | KF938353.1  | <i>Ovis aries</i> | Kainuu, Finland                           | 0 | 64.53 | 28.50 | (30)            | B | mEU |
| 108 | CHR1-FRA  | 24552790*** | <i>Ovis aries</i> | Charolles, France                         | 0 | 46.45 | 4.28  | This study, PCR | B | mEU |
| 109 | CHR2-FRA  | 24552790*** | <i>Ovis aries</i> | Charolles, France                         | 0 | 46.45 | 4.28  | This study, PCR | B | mEU |
| 110 | CHR3-FRA  | 24552790*** | <i>Ovis aries</i> | Charolles, France                         | 0 | 46.45 | 4.28  | This study, PCR | B | mEU |
| 111 | IDF1-FRA  | 24552790*** | <i>Ovis aries</i> | Île-de-France, France                     | 0 | 48.73 | 2.45  | This study, PCR | B | mEU |
| 112 | IDF2-FRA  | 24552790*** | <i>Ovis aries</i> | Île-de-France, France                     | 0 | 48.73 | 2.45  | This study, PCR | B | mEU |
| 113 | IDF3-FRA  | 24552790*** | <i>Ovis aries</i> | Île-de-France, France                     | 0 | 48.73 | 2.45  | This study, PCR | B | mEU |
| 114 | LAC1-FRA  | KF302447.1  | <i>Ovis aries</i> | Lacaune, France                           | 0 | 43.71 | 2.69  | (35)            | B | mEU |
| 115 | LAC2-FRA  | KF302453.1  | <i>Ovis aries</i> | Lacaune, France                           | 0 | 43.71 | 2.69  | (35)            | B | mEU |
| 116 | LAC3-FRA  | KF302460.1  | <i>Ovis aries</i> | Lacaune, France                           | 0 | 43.71 | 2.69  | (35)            | B | mEU |
| 117 | RDR1-FRA  | 24552790*** | <i>Ovis aries</i> | Pyrenees, France                          | 0 | 42.66 | 2.26  | This study, PCR | B | mEU |
| 118 | RDR2-FRA  | 24552790*** | <i>Ovis aries</i> | Pyrenees, France                          | 0 | 42.66 | 2.26  | This study, PCR | B | mEU |
| 119 | RDR3-FRA  | 24552790*** | <i>Ovis aries</i> | Pyrenees, France                          | 0 | 42.66 | 2.26  | This study, PCR | B | mEU |
| 120 | RDR4-FRA  | 24552790*** | <i>Ovis aries</i> | Pyrenees, France                          | 0 | 42.66 | 2.26  | This study, PCR | B | mEU |
| 121 | RMB01-FRA | SRS1709705  | <i>Ovis aries</i> | Rambouillet, France                       | 0 | 48.64 | 1.83  | SRA             | B | mEU |
| 122 | RMB02-FRA | SRS1709706  | <i>Ovis aries</i> | Rambouillet, France                       | 0 | 48.64 | 1.83  | SRA             | B | mEU |
| 123 | RMB03-FRA | SRS1709707  | <i>Ovis aries</i> | Rambouillet, France                       | 0 | 48.64 | 1.83  | SRA             | B | mEU |
| 124 | RMB04-FRA | SRS1709709  | <i>Ovis aries</i> | Rambouillet, France                       | 0 | 48.64 | 1.83  | SRA             | B | mEU |
| 125 | RMB05-FRA | SRS1709711  | <i>Ovis aries</i> | Rambouillet, France                       | 0 | 48.64 | 1.83  | SRA             | B | mEU |
| 126 | RMB06-FRA | SRS1709510  | <i>Ovis aries</i> | Rambouillet, France                       | 0 | 48.64 | 1.83  | SRA             | B | mEU |
| 127 | RMB07-FRA | SRS1709716  | <i>Ovis aries</i> | Rambouillet, France                       | 0 | 48.64 | 1.83  | SRA             | B | mEU |
| 128 | RMB08-FRA | SRS1709714  | <i>Ovis aries</i> | Rambouillet, France                       | 0 | 48.64 | 1.83  | SRA             | B | mEU |
| 129 | RMB09-FRA | SRS1709712  | <i>Ovis aries</i> | Rambouillet, France                       | 0 | 48.64 | 1.83  | SRA             | B | mEU |
| 130 | RMB10-FRA | SRS1709717  | <i>Ovis aries</i> | Rambouillet, France                       | 0 | 48.64 | 1.83  | SRA             | B | mEU |
| 131 | CHV1-GBR  | SRS335729   | <i>Ovis aries</i> | Cheviot Hills, UK                         | 0 | 55.48 | -2.15 | SRA             | B | mEU |
| 132 | CHV2-GBR  | SRS335690   | <i>Ovis aries</i> | Cheviot Hills, UK                         | 0 | 55.48 | -2.15 | SRA             | B | mEU |
| 133 | DSH1-GBR  | SRS1709526  | <i>Ovis aries</i> | Dorsetshire, UK                           | 0 | 50.71 | -2.44 | SRA             | B | mEU |
| 134 | DSH2-GBR  | SRS1709528  | <i>Ovis aries</i> | Dorsetshire, UK                           | 0 | 50.71 | -2.44 | SRA             | B | mEU |
| 135 | DSH3-GBR  | SRS1709527  | <i>Ovis aries</i> | Dorsetshire, UK                           | 0 | 50.71 | -2.44 | SRA             | B | mEU |
| 136 | DSH4-GBR  | SRS1709561  | <i>Ovis aries</i> | Dorsetshire, UK                           | 0 | 50.71 | -2.44 | SRA             | B | mEU |
| 137 | DWM1-GBR  | SRS335709   | <i>Ovis aries</i> | Dollgellau, Wales                         | 0 | 52.74 | -3.88 | SRA             | B | mEU |
| 138 | OXD1-GBR  | KF938359.1  | <i>Ovis aries</i> | Oxford, UK                                | 0 | 51.77 | -1.28 | (30)            | B | mEU |
| 139 | RMY1-AUS  | HM236175.1  | <i>Ovis aries</i> | Romney Marsh, UK                          | 0 | 50.99 | 0.89  | (31)            | A | mEU |
| 140 | RMY2-GBR  | SRS335691   | <i>Ovis aries</i> | Romney Marsh, UK                          | 0 | 50.99 | 0.89  | SRA             | A | mEU |
| 141 | TRWM1-GBR | SRS335715   | <i>Ovis aries</i> | Tregaron, Wales, UK                       | 0 | 52.23 | -3.94 | SRA             | B | mEU |
| 142 | WHSF1-GBR | SRS335714   | <i>Ovis aries</i> | Central Wales, UK                         | 0 | 52.38 | -3.68 | SRA             | B | mEU |
| 143 | APP1-ITA  | KF302450.1  | <i>Ovis aries</i> | Apennine Mountains, Italy                 | 0 | 43.61 | 12.24 | (35)            | B | mEU |
| 144 | APP2-ITA  | KF302451.1  | <i>Ovis aries</i> | Apennine Mountains, Italy                 | 0 | 43.61 | 12.24 | (35)            | B | mEU |
| 145 | COM1-ITA  | KF302440.1  | <i>Ovis aries</i> | Comiso, Province of Ragusa, Sicily, Italy | 0 | 36.96 | 14.61 | (35)            | A | mEU |
| 146 | COM2-ITA  | KF302441.1  | <i>Ovis aries</i> | Comiso, Province of Ragusa, Sicily, Italy | 0 | 36.96 | 14.61 | (35)            | A | mEU |
| 147 | COM3-ITA  | KF302442.1  | <i>Ovis aries</i> | Comiso, Province of Ragusa, Sicily, Italy | 0 | 36.96 | 14.61 | (35)            | A | mEU |
| 148 | COM4-ITA  | KF302443.1  | <i>Ovis aries</i> | Comiso, Province of Ragusa, Sicily, Italy | 0 | 36.96 | 14.61 | (35)            | A | mEU |
| 149 | COM5-ITA  | KF302444.1  | <i>Ovis aries</i> | Comiso, Province of Ragusa, Sicily, Italy | 0 | 36.96 | 14.61 | (35)            | A | mEU |
| 150 | COM6-ITA  | KF302445.1  | <i>Ovis aries</i> | Comiso, Province of Ragusa, Sicily, Italy | 0 | 36.96 | 14.61 | (35)            | A | mEU |
| 151 | COM7-ITA  | KF302452.1  | <i>Ovis aries</i> | Comiso, Province of Ragusa, Sicily, Italy | 0 | 36.96 | 14.61 | (35)            | B | mEU |

|     |           |             |                           |                                           |   |         |         |                 |   |      |
|-----|-----------|-------------|---------------------------|-------------------------------------------|---|---------|---------|-----------------|---|------|
| 152 | COM8-ITA  | KF302461.1  | <i>Ovis aries</i>         | Comiso, Province of Ragusa, Sicily, Italy | 0 | 36.96   | 14.61   | (35)            | B | mEU  |
| 153 | COM9-ITA  | KF302462.1  | <i>Ovis aries</i>         | Comiso, Province of Ragusa, Sicily, Italy | 0 | 36.96   | 14.61   | (35)            | B | mEU  |
| 154 | GEN1-ITA  | KF302448.1  | <i>Ovis aries</i>         | Tavoliere delle Puglie, Italy             | 0 | 41.47   | 15.53   | (35)            | B | mEU  |
| 155 | GEN2-ITA  | KF302455.1  | <i>Ovis aries</i>         | Tavoliere delle Puglie, Italy             | 0 | 41.47   | 15.53   | (35)            | B | mEU  |
| 156 | GEN3-ITA  | KF302457.1  | <i>Ovis aries</i>         | Tavoliere delle Puglie, Italy             | 0 | 41.47   | 15.53   | (35)            | B | mEU  |
| 157 | MNZ1-ITA  | KF302446.1  | <i>Ovis aries</i>         | Abruzzo, Italy                            | 0 | 42.25   | 13.79   | (35)            | A | mEU  |
| 158 | MNZ2-ITA  | KF302459.1  | <i>Ovis aries</i>         | Abruzzo, Italy                            | 0 | 42.25   | 13.79   | (35)            | B | mEU  |
| 159 | SOP1-ITA  | KF302449.1  | <i>Ovis aries</i>         | Macerata, Italy                           | 0 | 43.30   | 13.45   | (35)            | B | mEU  |
| 160 | SOP2-ITA  | KF302454.1  | <i>Ovis aries</i>         | Macerata, Italy                           | 0 | 43.30   | 13.45   | (35)            | B | mEU  |
| 161 | SOP3-ITA  | KF302456.1  | <i>Ovis aries</i>         | Macerata, Italy                           | 0 | 43.30   | 13.45   | (35)            | B | mEU  |
| 162 | SOP4-ITA  | KF302458.1  | <i>Ovis aries</i>         | Macerata, Italy                           | 0 | 43.30   | 13.45   | (35)            | B | mEU  |
| 163 | OARM1-DEU | HM236184.1  | <i>Ovis aries musimon</i> | Sardinia/Corsica, Italy                   | 0 | 41.22   | 9.21    | (31)            | B | mEU  |
| 164 | OARM2-DEU | HM236185.1  | <i>Ovis aries musimon</i> | Sardinia/Corsica, Italy                   | 0 | 41.22   | 9.21    | (31)            | B | mEU  |
| 165 | TXL1-NLD  | KJ954145.1  | <i>Ovis aries</i>         | Texel island, Netherlands                 | 0 | 53.08   | 4.81    | GenBank         | B | mEU  |
| 166 | TXL2-NLD  | 24552790*** | <i>Ovis aries</i>         | Texel island, Netherlands                 | 0 | 53.08   | 4.81    | This study, PCR | B | mEU  |
| 167 | TXL3-NLD  | 24552790*** | <i>Ovis aries</i>         | Texel island, Netherlands                 | 0 | 53.08   | 4.81    | This study, PCR | B | mEU  |
| 168 | TXL4-NLD  | 24552790*** | <i>Ovis aries</i>         | Texel island, Netherlands                 | 0 | 53.08   | 4.81    | This study, PCR | B | mEU  |
| 169 | TXL5-NLD  | 24552790*** | <i>Ovis aries</i>         | Texel island, Netherlands                 | 0 | 53.08   | 4.81    | This study, PCR | B | mEU  |
| 170 | SWN1-POL  | KF938349.1  | <i>Ovis aries</i>         | Łódź Voivodeship, Poland                  | 0 | 51.73   | 19.47   | (30)            | B | mEU  |
| 171 | WRZ1-POL  | KF938350.1  | <i>Ovis aries</i>         | Białystok, Poland                         | 0 | 53.13   | 23.15   | (30)            | B | mEU  |
| 172 | TZYG1-RUS | 24552790*** | <i>Ovis aries</i>         | Carpathian Mountains, Romania             | 0 | 47.33   | 25.55   | This study, PCR | B | mEU  |
| 173 | TZYG2-RUS | 24552790*** | <i>Ovis aries</i>         | Carpathian Mountains, Romania             | 0 | 47.33   | 25.55   | This study, PCR | B | mEU  |
| 174 | KUCH1-RUS | 24552790*** | <i>Ovis aries</i>         | Kuchugury, Oblast Voronezh, Russia        | 0 | 51.60   | 38.30   | This study, PCR | B | mEU  |
| 175 | KUCH2-RUS | 24552790*** | <i>Ovis aries</i>         | Kuchugury, Oblast Voronezh, Russia        | 0 | 51.60   | 38.30   | This study, PCR | A | mEU  |
| 176 | KUIB1-RUS | KF938346.1  | <i>Ovis aries</i>         | Samara, Russia                            | 0 | 53.23   | 50.22   | (30)            | B | mEU  |
| 177 | KUIB2-RUS | 24552790*** | <i>Ovis aries</i>         | Samara, Russia                            | 0 | 53.23   | 50.22   | This study, PCR | B | mEU  |
| 178 | KUIB3-RUS | 24552790*** | <i>Ovis aries</i>         | Samara, Russia                            | 0 | 53.23   | 50.22   | This study, PCR | B | mEU  |
| 179 | OPR1-RUS  | KF938352.1  | <i>Ovis aries</i>         | Oparino, Oblast Kirow, Russia             | 0 | 59.88   | 48.29   | (30)            | B | mEU  |
| 180 | RMNV1-RUS | 24552790*** | <i>Ovis aries</i>         | Upper Volga region, Russia                | 0 | 56.68   | 36.58   | This study, PCR | A | mEU  |
| 181 | RMNV2-RUS | 24552790*** | <i>Ovis aries</i>         | Upper Volga region, Russia                | 0 | 56.68   | 36.58   | This study, PCR | A | mEU  |
| 182 | RMNV3-RUS | 24552790*** | <i>Ovis aries</i>         | Upper Volga region, Russia                | 0 | 56.68   | 36.58   | This study, PCR | B | mEU  |
| 183 | RMNV4-RUS | 24552790*** | <i>Ovis aries</i>         | Upper Volga region, Russia                | 0 | 56.68   | 36.58   | This study, PCR | B | mEU  |
| 184 | RMNV5-RUS | 24552790*** | <i>Ovis aries</i>         | Upper Volga region, Russia                | 0 | 56.68   | 36.58   | This study, PCR | B | mEU  |
| 185 | RULH1-RUS | 24552790*** | <i>Ovis aries</i>         | Voronezh Oblast, Russia                   | 0 | 51.05   | 40.12   | This study, PCR | B | mEU  |
| 186 | RULH2-RUS | 24552790*** | <i>Ovis aries</i>         | Voronezh Oblast, Russia                   | 0 | 51.05   | 40.12   | This study, PCR | B | mEU  |
| 187 | RUV1-RUS  | KF938356.1  | <i>Ovis aries</i>         | Viena Karelia, Russia                     | 0 | 64.31   | 32.83   | (30)            | B | mEU  |
| 188 | UDM1-RUS  | KF938341.1  | <i>Ovis aries</i>         | Udmurtia, Russia                          | 0 | 57.23   | 52.80   | (30)            | B | mEU  |
| 189 | SBF1-GBR  | 24552790*** | <i>Ovis aries</i>         | Scottish/English border, UK               | 0 | 55.32   | -2.71   | This study, PCR | B | mEU  |
| 190 | SBF2-GBR  | 24552790*** | <i>Ovis aries</i>         | Scottish/English border, UK               | 0 | 55.32   | -2.71   | This study, PCR | B | mEU  |
| 191 | SBF3-GBR  | 24552790*** | <i>Ovis aries</i>         | Scottish/English border, UK               | 0 | 55.32   | -2.71   | This study, PCR | B | mEU  |
| 192 | SBF4-GBR  | 24552790*** | <i>Ovis aries</i>         | Scottish/English border, UK               | 0 | 55.32   | -2.71   | This study, PCR | B | mEU  |
| 193 | SOA1-GBR  | 24552790*** | <i>Ovis aries</i>         | Soay, Scotland, UK                        | 0 | 57.15   | -6.22   | This study, PCR | B | mEU  |
| 194 | SOA2-GBR  | 24552790*** | <i>Ovis aries</i>         | Soay, Scotland, UK                        | 0 | 57.15   | -6.22   | This study, PCR | B | mEU  |
| 195 | SOA3-GBR  | 24552790*** | <i>Ovis aries</i>         | Soay, Scotland, UK                        | 0 | 57.15   | -6.22   | This study, PCR | B | mEU  |
| 196 | KRST1-SVN | 24552790*** | <i>Ovis aries</i>         | Bovec, Slovenia                           | 0 | 46.34   | 13.55   | This study, PCR | B | mEU  |
| 197 | KRST2-SVN | 24552790*** | <i>Ovis aries</i>         | Bovec, Slovenia                           | 0 | 46.34   | 13.55   | This study, PCR | B | mEU  |
| 198 | KRST3-SVN | 24552790*** | <i>Ovis aries</i>         | Bovec, Slovenia                           | 0 | 46.34   | 13.55   | This study, PCR | B | mEU  |
| 199 | PSJE1-SRB | 24552790*** | <i>Ovis aries</i>         | Sjenica, Serbia                           | 0 | 43.28   | 20.00   | This study, PCR | A | mEU  |
| 200 | PSJE2-SRB | 24552790*** | <i>Ovis aries</i>         | Sjenica, Serbia                           | 0 | 43.28   | 20.00   | This study, PCR | A | mEU  |
| 201 | PSRB1-SRB | KF938347.1  | <i>Ovis aries</i>         | Belgrade, Serbia                          | 0 | 44.74   | 20.44   | (30)            | B | mEU  |
| 202 | CMF1-UKR  | KF938357.1  | <i>Ovis aries</i>         | Zakarpattia, Ukraine                      | 0 | 48.45   | 23.24   | (30)            | B | mEU  |
| 203 | CCP1-TUR  | SRS335708   | <i>Ovis aries</i>         | Aydın Province, Türkiye                   | 0 | 37.84   | 27.84   | SRA             | B | mWAN |
| 204 | SKZ1-TUR  | SRS335711   | <i>Ovis aries</i>         | Izmir, Türkiye                            | 0 | 38.42   | 27.19   | SRA             | B | mWAN |
| 205 | SKZ2-TUR  | SRS335675   | <i>Ovis aries</i>         | Izmir, Türkiye                            | 0 | 38.42   | 27.19   | SRA             | B | mWAN |
| 206 | ODU1-MAR  | ERS154859   | <i>Ovis aries</i>         | Ouled Djellal, Sidi Moussa, Algeria       | 0 | 34.6431 | -2.1639 | SRA             | B | mAFR |
| 207 | ODU2-MAR  | ERS154855   | <i>Ovis aries</i>         | Ouled Djellal, Jerrada, Algeria           | 0 | 33.8475 | -2.6312 | SRA             | A | mAFR |

|     |           |           |                   |                                |   |       |       |     |   |      |
|-----|-----------|-----------|-------------------|--------------------------------|---|-------|-------|-----|---|------|
| 208 | OUD3-MAR  | ERS154849 | <i>Ovis aries</i> | Ouled Djellal, Algeria         | 0 | 34.45 | 5.11  | SRA | B | mAFR |
| 209 | OUD4-MAR  | ERS154816 | <i>Ovis aries</i> | Ouled Djellal, Algeria         | 0 | 34.45 | 5.11  | SRA | B | mAFR |
| 210 | OUD5-MAR  | ERS154851 | <i>Ovis aries</i> | Ouled Djellal, Algeria         | 0 | 34.45 | 5.11  | SRA | B | mAFR |
| 211 | OUD6-MAR  | ERS154703 | <i>Ovis aries</i> | Ouled Djellal, Algeria         | 0 | 34.45 | 5.11  | SRA | B | mAFR |
| 212 | OUD7-MAR  | ERS154861 | <i>Ovis aries</i> | Ouled Djellal, Algeria         | 0 | 34.45 | 5.11  | SRA | B | mAFR |
| 213 | OUD8-MAR  | ERS154856 | <i>Ovis aries</i> | Ouled Djellal, Algeria         | 0 | 34.45 | 5.11  | SRA | B | mAFR |
| 214 | BGL1-MAR  | ERS154854 | <i>Ovis aries</i> | Beni Guil tribal area, Morocco | 0 | 32.83 | -2.08 | SRA | B | mAFR |
| 215 | BGL2-MAR  | ERS154840 | <i>Ovis aries</i> | Beni Guil tribal area, Morocco | 0 | 32.83 | -2.08 | SRA | B | mAFR |
| 216 | BGL3-MAR  | ERS154844 | <i>Ovis aries</i> | Beni Guil tribal area, Morocco | 0 | 32.83 | -2.08 | SRA | C | mAFR |
| 217 | BGL4-MAR  | ERS154700 | <i>Ovis aries</i> | Beni Guil tribal area, Morocco | 0 | 32.83 | -2.08 | SRA | B | mAFR |
| 218 | BGL5-MAR  | ERS154838 | <i>Ovis aries</i> | Beni Guil tribal area, Morocco | 0 | 32.83 | -2.08 | SRA | B | mAFR |
| 219 | BGL6-MAR  | ERS154706 | <i>Ovis aries</i> | Beni Guil tribal area, Morocco | 0 | 32.83 | -2.08 | SRA | B | mAFR |
| 220 | BJD1-MAR  | ERS154762 | <i>Ovis aries</i> | Middle Atlas, Morocco          | 0 | 33.50 | -4.50 | SRA | B | mAFR |
| 221 | DMN01-MAR | ERS154835 | <i>Ovis aries</i> | Tafilalt, Morocco              | 0 | 31.30 | -4.30 | SRA | B | mAFR |
| 222 | DMN02-MAR | ERS154824 | <i>Ovis aries</i> | Tafilalt, Morocco              | 0 | 31.30 | -4.30 | SRA | B | mAFR |
| 223 | DMN03-MAR | ERS154822 | <i>Ovis aries</i> | Tafilalt, Morocco              | 0 | 31.30 | -4.30 | SRA | B | mAFR |
| 224 | DMN04-MAR | ERS154813 | <i>Ovis aries</i> | Tafilalt, Morocco              | 0 | 31.30 | -4.30 | SRA | B | mAFR |
| 225 | DMN05-MAR | ERS154784 | <i>Ovis aries</i> | Tafilalt, Morocco              | 0 | 31.30 | -4.30 | SRA | B | mAFR |
| 226 | DMN06-MAR | ERS154786 | <i>Ovis aries</i> | Tafilalt, Morocco              | 0 | 31.30 | -4.30 | SRA | B | mAFR |
| 227 | DMN07-MAR | ERS154799 | <i>Ovis aries</i> | Tafilalt, Morocco              | 0 | 31.30 | -4.30 | SRA | B | mAFR |
| 228 | DMN08-MAR | ERS154798 | <i>Ovis aries</i> | Tafilalt, Morocco              | 0 | 31.30 | -4.30 | SRA | B | mAFR |
| 229 | DMN09-MAR | ERS154812 | <i>Ovis aries</i> | Tafilalt, Morocco              | 0 | 31.30 | -4.30 | SRA | B | mAFR |
| 230 | DMN10-MAR | ERS154785 | <i>Ovis aries</i> | Tafilalt, Morocco              | 0 | 31.30 | -4.30 | SRA | B | mAFR |
| 231 | DMN11-MAR | ERS154767 | <i>Ovis aries</i> | Tafilalt, Morocco              | 0 | 31.30 | -4.30 | SRA | B | mAFR |
| 232 | DMN12-MAR | ERS154774 | <i>Ovis aries</i> | Tafilalt, Morocco              | 0 | 31.30 | -4.30 | SRA | B | mAFR |
| 233 | DMN13-MAR | ERS154787 | <i>Ovis aries</i> | Tafilalt, Morocco              | 0 | 31.30 | -4.30 | SRA | B | mAFR |
| 234 | DMN14-MAR | ERS154783 | <i>Ovis aries</i> | Tafilalt, Morocco              | 0 | 31.30 | -4.30 | SRA | B | mAFR |
| 235 | DMN15-MAR | ERS154768 | <i>Ovis aries</i> | Tafilalt, Morocco              | 0 | 31.30 | -4.30 | SRA | B | mAFR |
| 236 | DMN16-MAR | ERS154744 | <i>Ovis aries</i> | Tafilalt, Morocco              | 0 | 31.30 | -4.30 | SRA | A | mAFR |
| 237 | DMN17-MAR | ERS154735 | <i>Ovis aries</i> | Tafilalt, Morocco              | 0 | 31.30 | -4.30 | SRA | B | mAFR |
| 238 | DMN18-MAR | ERS154765 | <i>Ovis aries</i> | Tafilalt, Morocco              | 0 | 31.30 | -4.30 | SRA | B | mAFR |
| 239 | DMN19-MAR | ERS154766 | <i>Ovis aries</i> | Tafilalt, Morocco              | 0 | 31.30 | -4.30 | SRA | B | mAFR |
| 240 | DMN20-MAR | ERS154758 | <i>Ovis aries</i> | Tafilalt, Morocco              | 0 | 31.30 | -4.30 | SRA | B | mAFR |
| 241 | DMN21-MAR | ERS154756 | <i>Ovis aries</i> | Tafilalt, Morocco              | 0 | 31.30 | -4.30 | SRA | B | mAFR |
| 242 | DMN22-MAR | ERS154743 | <i>Ovis aries</i> | Tafilalt, Morocco              | 0 | 31.30 | -4.30 | SRA | B | mAFR |
| 243 | DMN23-MAR | ERS154733 | <i>Ovis aries</i> | Tafilalt, Morocco              | 0 | 31.30 | -4.30 | SRA | B | mAFR |
| 244 | DMN24-MAR | ERS154725 | <i>Ovis aries</i> | Tafilalt, Morocco              | 0 | 31.30 | -4.30 | SRA | B | mAFR |
| 245 | DMN25-MAR | ERS154717 | <i>Ovis aries</i> | Tafilalt, Morocco              | 0 | 31.30 | -4.30 | SRA | B | mAFR |
| 246 | DMN26-MAR | ERS154711 | <i>Ovis aries</i> | Tafilalt, Morocco              | 0 | 31.30 | -4.30 | SRA | B | mAFR |
| 247 | DMN27-MAR | ERS154814 | <i>Ovis aries</i> | Tafilalt, Morocco              | 0 | 31.30 | -4.30 | SRA | B | mAFR |
| 248 | DMN28-MAR | ERS154800 | <i>Ovis aries</i> | Tafilalt, Morocco              | 0 | 31.30 | -4.30 | SRA | B | mAFR |
| 249 | DMN29-MAR | ERS154775 | <i>Ovis aries</i> | Tafilalt, Morocco              | 0 | 31.30 | -4.30 | SRA | B | mAFR |
| 250 | DMN30-MAR | ERS154734 | <i>Ovis aries</i> | Tafilalt, Morocco              | 0 | 31.30 | -4.30 | SRA | B | mAFR |
| 251 | SAR01-MAR | ERS154843 | <i>Ovis aries</i> | Central Morocco, Morocco       | 0 | 32.80 | -7.40 | SRA | B | mAFR |
| 252 | SAR02-MAR | ERS154823 | <i>Ovis aries</i> | Central Morocco, Morocco       | 0 | 32.80 | -7.40 | SRA | B | mAFR |
| 253 | SAR03-MAR | ERS154771 | <i>Ovis aries</i> | Central Morocco, Morocco       | 0 | 32.80 | -7.40 | SRA | B | mAFR |
| 254 | SAR04-MAR | ERS154763 | <i>Ovis aries</i> | Central Morocco, Morocco       | 0 | 32.80 | -7.40 | SRA | B | mAFR |
| 255 | SAR05-MAR | ERS154752 | <i>Ovis aries</i> | Central Morocco, Morocco       | 0 | 32.80 | -7.40 | SRA | B | mAFR |
| 256 | SAR06-MAR | ERS154761 | <i>Ovis aries</i> | Central Morocco, Morocco       | 0 | 32.80 | -7.40 | SRA | B | mAFR |
| 257 | SAR07-MAR | ERS154760 | <i>Ovis aries</i> | Central Morocco, Morocco       | 0 | 32.80 | -7.40 | SRA | B | mAFR |
| 258 | SAR08-MAR | ERS154759 | <i>Ovis aries</i> | Central Morocco, Morocco       | 0 | 32.80 | -7.40 | SRA | B | mAFR |
| 259 | SAR09-MAR | ERS154754 | <i>Ovis aries</i> | Central Morocco, Morocco       | 0 | 32.80 | -7.40 | SRA | B | mAFR |
| 260 | SAR10-MAR | ERS154753 | <i>Ovis aries</i> | Central Morocco, Morocco       | 0 | 32.80 | -7.40 | SRA | B | mAFR |
| 261 | SAR11-MAR | ERS154747 | <i>Ovis aries</i> | Central Morocco, Morocco       | 0 | 32.80 | -7.40 | SRA | B | mAFR |
| 262 | SAR12-MAR | ERS154738 | <i>Ovis aries</i> | Central Morocco, Morocco       | 0 | 32.80 | -7.40 | SRA | B | mAFR |
| 263 | SAR13-MAR | ERS154745 | <i>Ovis aries</i> | Central Morocco, Morocco       | 0 | 32.80 | -7.40 | SRA | B | mAFR |
| 264 | SAR14-MAR | ERS154740 | <i>Ovis aries</i> | Central Morocco, Morocco       | 0 | 32.80 | -7.40 | SRA | B | mAFR |
| 265 | SAR15-MAR | ERS154737 | <i>Ovis aries</i> | Central Morocco, Morocco       | 0 | 32.80 | -7.40 | SRA | B | mAFR |

|     |            |            |                   |                                 |   |        |       |         |   |        |
|-----|------------|------------|-------------------|---------------------------------|---|--------|-------|---------|---|--------|
| 266 | SAR16-MAR  | ERS154731  | <i>Ovis aries</i> | Central Morocco, Morocco        | 0 | 32.80  | -7.40 | SRA     | B | mAFR   |
| 267 | SAR17-MAR  | ERS154730  | <i>Ovis aries</i> | Central Morocco, Morocco        | 0 | 32.80  | -7.40 | SRA     | B | mAFR   |
| 268 | SAR18-MAR  | ERS154728  | <i>Ovis aries</i> | Central Morocco, Morocco        | 0 | 32.80  | -7.40 | SRA     | B | mAFR   |
| 269 | SAR19-MAR  | ERS154722  | <i>Ovis aries</i> | Central Morocco, Morocco        | 0 | 32.80  | -7.40 | SRA     | B | mAFR   |
| 270 | SAR20-MAR  | ERS154720  | <i>Ovis aries</i> | Central Morocco, Morocco        | 0 | 32.80  | -7.40 | SRA     | B | mAFR   |
| 271 | SAR21-MAR  | ERS154716  | <i>Ovis aries</i> | Central Morocco, Morocco        | 0 | 32.80  | -7.40 | SRA     | C | mAFR   |
| 272 | SAR22-MAR  | ERS154701  | <i>Ovis aries</i> | Central Morocco, Morocco        | 0 | 32.80  | -7.40 | SRA     | B | mAFR   |
| 273 | SAR23-MAR  | ERS154764  | <i>Ovis aries</i> | Central Morocco, Morocco        | 0 | 32.80  | -7.40 | SRA     | B | mAFR   |
| 274 | SAR24-MAR  | ERS154721  | <i>Ovis aries</i> | Central Morocco, Morocco        | 0 | 32.80  | -7.40 | SRA     | B | mAFR   |
| 275 | SAR25-MAR  | ERS154727  | <i>Ovis aries</i> | Central Morocco, Morocco        | 0 | 32.80  | -7.40 | SRA     | B | mAFR   |
| 276 | SAR26-MAR  | ERS154746  | <i>Ovis aries</i> | Central Morocco, Morocco        | 0 | 32.80  | -7.40 | SRA     | B | mAFR   |
| 277 | SAR27-MAR  | ERS154729  | <i>Ovis aries</i> | Central Morocco, Morocco        | 0 | 32.80  | -7.40 | SRA     | B | mAFR   |
| 278 | TMD01-MAR  | ERS154830  | <i>Ovis aries</i> | Timahdite, Morocco              | 0 | 33.24  | -5.06 | SRA     | B | mAFR   |
| 279 | TMD02-MAR  | ERS154829  | <i>Ovis aries</i> | Timahdite, Morocco              | 0 | 33.24  | -5.06 | SRA     | B | mAFR   |
| 280 | TMD03-MAR  | ERS154820  | <i>Ovis aries</i> | Timahdite, Morocco              | 0 | 33.24  | -5.06 | SRA     | B | mAFR   |
| 281 | TMD04-MAR  | ERS154819  | <i>Ovis aries</i> | Timahdite, Morocco              | 0 | 33.24  | -5.06 | SRA     | B | mAFR   |
| 282 | TMD05-MAR  | ERS154808  | <i>Ovis aries</i> | Timahdite, Morocco              | 0 | 33.24  | -5.06 | SRA     | B | mAFR   |
| 283 | TMD06-MAR  | ERS154796  | <i>Ovis aries</i> | Timahdite, Morocco              | 0 | 33.24  | -5.06 | SRA     | B | mAFR   |
| 284 | TMD07-MAR  | ERS154806  | <i>Ovis aries</i> | Timahdite, Morocco              | 0 | 33.24  | -5.06 | SRA     | B | mAFR   |
| 285 | TMD08-MAR  | ERS154794  | <i>Ovis aries</i> | Timahdite, Morocco              | 0 | 33.24  | -5.06 | SRA     | B | mAFR   |
| 286 | TMD09-MAR  | ERS154782  | <i>Ovis aries</i> | Timahdite, Morocco              | 0 | 33.24  | -5.06 | SRA     | B | mAFR   |
| 287 | TMD10-MAR  | ERS154818  | <i>Ovis aries</i> | Timahdite, Morocco              | 0 | 33.24  | -5.06 | SRA     | B | mAFR   |
| 288 | TMD11-MAR  | ERS154797  | <i>Ovis aries</i> | Timahdite, Morocco              | 0 | 33.24  | -5.06 | SRA     | B | mAFR   |
| 289 | TMD12-MAR  | ERS154780  | <i>Ovis aries</i> | Timahdite, Morocco              | 0 | 33.24  | -5.06 | SRA     | B | mAFR   |
| 290 | TMD13-MAR  | ERS154809  | <i>Ovis aries</i> | Timahdite, Morocco              | 0 | 33.24  | -5.06 | SRA     | B | mAFR   |
| 291 | TMD14-MAR  | ERS154770  | <i>Ovis aries</i> | Timahdite, Morocco              | 0 | 33.24  | -5.06 | SRA     | B | mAFR   |
| 292 | TMD15-MAR  | ERS154781  | <i>Ovis aries</i> | Timahdite, Morocco              | 0 | 33.24  | -5.06 | SRA     | B | mAFR   |
| 293 | TMD16-MAR  | ERS154807  | <i>Ovis aries</i> | Timahdite, Morocco              | 0 | 33.24  | -5.06 | SRA     | B | mAFR   |
| 294 | EMZ1-ETH   | SRS335697  | <i>Ovis aries</i> | Amhara, Ethiopia                | 0 | 11.85  | 38.03 | SRA     | B | mAFR   |
| 295 | DJL1-BEN   | KF977845.1 | <i>Ovis aries</i> | West/Central Africa, Benin      | 0 | 8.26   | 2.26  | (32)    | B | mAFR   |
| 296 | NQA1-ZAF   | SRS335740  | <i>Ovis aries</i> | Namaqua, South Africa           | 0 | -30.02 | 17.58 | SRA     | B | mAFR   |
| 297 | RDA1-ZAF   | SRS335722  | <i>Ovis aries</i> | Upington, South Africa          | 0 | -28.40 | 21.24 | SRA     | A | mAFR   |
| 298 | RDA2-ZAF   | SRS335702  | <i>Ovis aries</i> | Upington, South Africa          | 0 | -28.40 | 21.24 | SRA     | B | mAFR   |
| 299 | SHL1-ZAF   | KF977846.1 | <i>Ovis aries</i> | Sahel, Central Africa           | 0 | 6.81   | 20.42 | (32)    | B | mAFR   |
| 300 | BGE1-BGD   | SRS335705  | <i>Ovis aries</i> | Dhaka, Bangladesh               | 0 | 23.80  | 90.41 | SRA     | A | mEASIA |
| 301 | BGE2-BGD   | SRS335686  | <i>Ovis aries</i> | Dhaka, Bangladesh               | 0 | 23.80  | 90.41 | SRA     | A | mEASIA |
| 302 | ALT1-CHN   | KF938320.1 | <i>Ovis aries</i> | Altay, China                    | 0 | 47.86  | 88.14 | (30)    | C | mEASIA |
| 303 | AWG1-CHN   | KP998470.1 | <i>Ovis aries</i> | Gonjo, Qamdo, Tibet, China      | 0 | 30.86  | 98.29 | GenBank | A | mEASIA |
| 304 | BRK1-CHN   | KF938321.1 | <i>Ovis aries</i> | Bachu County, Xinjiang, China   | 0 | 39.75  | 78.55 | (30)    | A | mEASIA |
| 305 | BSB1-CHN   | KF938330.1 | <i>Ovis aries</i> | Yumin County, Xinjiang, China   | 0 | 46.20  | 82.97 | (30)    | A | mEASIA |
| 306 | BYB1-CHN   | KF938331.1 | <i>Ovis aries</i> | Hejing County, Xinjiang, China  | 0 | 42.88  | 85.25 | (30)    | A | mEASIA |
| 307 | DLG1-CHN   | KF938332.1 | <i>Ovis aries</i> | Shache County, Xingjiang, China | 0 | 38.37  | 77.23 | (30)    | A | mEASIA |
| 308 | DLG2-CHN   | SRS1071053 | <i>Ovis aries</i> | Shache County, Xingjiang, China | 0 | 38.37  | 77.23 | SRA     | B | mEASIA |
| 309 | GARZ01-CHN | KU681175   | <i>Ovis aries</i> | Garze Tibetan aut. pref., China | 0 | 31.64  | 99.98 | (38)    | B | mEASIA |
| 310 | GARZ02-CHN | KU681176   | <i>Ovis aries</i> | Garze Tibetan aut. pref., China | 0 | 31.64  | 99.98 | (38)    | B | mEASIA |
| 311 | GARZ03-CHN | KU681177   | <i>Ovis aries</i> | Garze Tibetan aut. pref., China | 0 | 31.64  | 99.98 | (38)    | A | mEASIA |
| 312 | GARZ04-CHN | KU681178   | <i>Ovis aries</i> | Garze Tibetan aut. pref., China | 0 | 31.64  | 99.98 | (38)    | A | mEASIA |
| 313 | GARZ05-CHN | KU681179   | <i>Ovis aries</i> | Garze Tibetan aut. pref., China | 0 | 31.64  | 99.98 | (38)    | A | mEASIA |
| 314 | GARZ06-CHN | KU681180   | <i>Ovis aries</i> | Garze Tibetan aut. pref., China | 0 | 31.64  | 99.98 | (38)    | B | mEASIA |
| 315 | GARZ07-CHN | KU681181   | <i>Ovis aries</i> | Garze Tibetan aut. pref., China | 0 | 31.64  | 99.98 | (38)    | A | mEASIA |
| 316 | GARZ08-CHN | KU681182   | <i>Ovis aries</i> | Garze Tibetan aut. pref., China | 0 | 31.64  | 99.98 | (38)    | B | mEASIA |
| 317 | GARZ09-CHN | KU681183   | <i>Ovis aries</i> | Garze Tibetan aut. pref., China | 0 | 31.64  | 99.98 | (38)    | B | mEASIA |
| 318 | GARZ10-CHN | KU681184   | <i>Ovis aries</i> | Garze Tibetan aut. pref., China | 0 | 31.64  | 99.98 | (38)    | A | mEASIA |
| 319 | GARZ11-CHN | KU681185   | <i>Ovis aries</i> | Garze Tibetan aut. pref., China | 0 | 31.64  | 99.98 | (38)    | B | mEASIA |
| 320 | GARZ12-CHN | KU681186   | <i>Ovis aries</i> | Garze Tibetan aut. pref., China | 0 | 31.64  | 99.98 | (38)    | B | mEASIA |
| 321 | GARZ13-CHN | KU681187   | <i>Ovis aries</i> | Garze Tibetan aut. pref., China | 0 | 31.64  | 99.98 | (38)    | C | mEASIA |
| 322 | GARZ14-CHN | KU681188   | <i>Ovis aries</i> | Garze Tibetan aut. pref., China | 0 | 31.64  | 99.98 | (38)    | C | mEASIA |
| 323 | GARZ15-CHN | KU681189   | <i>Ovis aries</i> | Garze Tibetan aut. pref., China | 0 | 31.64  | 99.98 | (38)    | C | mEASIA |

|     |            |             |                   |                                                  |   |       |        |                 |   |        |
|-----|------------|-------------|-------------------|--------------------------------------------------|---|-------|--------|-----------------|---|--------|
| 324 | GARZ16-CHN | KU681190    | <i>Ovis aries</i> | Garze Tibetan aut. pref., China                  | 0 | 31.64 | 99.98  | (38)            | B | mEASIA |
| 325 | GARZ17-CHN | KU681191    | <i>Ovis aries</i> | Garze Tibetan aut. pref., China                  | 0 | 31.64 | 99.98  | (38)            | C | mEASIA |
| 326 | GARZ18-CHN | KU681192    | <i>Ovis aries</i> | Garze Tibetan aut. pref., China                  | 0 | 31.64 | 99.98  | (38)            | B | mEASIA |
| 327 | GNJ1-CHN   | KP998472.1  | <i>Ovis aries</i> | Xiahe, Gannan, Gansu, China                      | 0 | 35.05 | 102.52 | GenBank         | A | mEASIA |
| 328 | GSTB1-TIB  | KP981379.1  | <i>Ovis aries</i> | Gansu, China                                     | 0 | 37.33 | 103.33 | GenBank         | B | mEASIA |
| 329 | HLB1-CHN   | KF938327.1  | <i>Ovis aries</i> | Hulun Buir, Inner Mongolia, China                | 0 | 49.22 | 119.77 | (30)            | C | mEASIA |
| 330 | HTN1-CHN   | KF938322.1  | <i>Ovis aries</i> | Hetian, Xinjiang, China                          | 0 | 37.22 | 79.92  | (30)            | A | mEASIA |
| 331 | HUB1-CHN   | KP998471.1  | <i>Ovis aries</i> | Zhongba County, China                            | 0 | 30.58 | 83.77  | GenBank         | C | mEASIA |
| 332 | HZG1-CHN   | KF938329.1  | <i>Ovis aries</i> | Hanzhong, Shaanxi, China                         | 0 | 33.08 | 107.03 | (30)            | B | mEASIA |
| 333 | JZG1-CHN   | KF938328.1  | <i>Ovis aries</i> | Jinzhong, Shanxi, China                          | 0 | 37.69 | 112.75 | (30)            | B | mEASIA |
| 334 | KGZ1-KGZ   | KF938334.1  | <i>Ovis aries</i> | Kizilsu Kirghiz (aut. pref.), Xingjiang, China   | 0 | 39.97 | 75.06  | (30)            | A | mEASIA |
| 335 | KZK1-KAZ   | KF938333.1  | <i>Ovis aries</i> | Tekes County, Xinjiang, China                    | 0 | 42.93 | 82.02  | (30)            | B | mEASIA |
| 336 | LPN1-CHN   | KF938323.1  | <i>Ovis aries</i> | Lop Nor, Qakilik, Bayingolin, China              | 0 | 40.50 | 90.50  | (30)            | A | mEASIA |
| 337 | LZLT1-CHN  | KF938335.1  | <i>Ovis aries</i> | Lanzhou, Gansu, China                            | 0 | 36.04 | 103.86 | (30)            | B | mEASIA |
| 338 | MBF1-CHN   | KF938318.1  | <i>Ovis aries</i> | Minxian, Dingxi, Gansu, China                    | 0 | 34.46 | 104.21 | (30)            | C | mEASIA |
| 339 | NGW01-CHN  | KU681193    | <i>Ovis aries</i> | Ngawa, Tibetan Qiang (aut. pref.), China         | 0 | 31.90 | 102.22 | (38)            | A | mEASIA |
| 340 | NGW02-CHN  | KU681194    | <i>Ovis aries</i> | Ngawa, Tibetan Qiang (aut. pref.), China         | 0 | 31.90 | 102.22 | (38)            | A | mEASIA |
| 341 | NGW03-CHN  | KU681195    | <i>Ovis aries</i> | Ngawa, Tibetan Qiang (aut. pref.), China         | 0 | 31.90 | 102.22 | (38)            | B | mEASIA |
| 342 | NGW04-CHN  | KU681196    | <i>Ovis aries</i> | Ngawa, Tibetan Qiang (aut. pref.), China         | 0 | 31.90 | 102.22 | (38)            | B | mEASIA |
| 343 | NGW05-CHN  | KU681197    | <i>Ovis aries</i> | Ngawa, Tibetan Qiang (aut. pref.), China         | 0 | 31.90 | 102.22 | (38)            | A | mEASIA |
| 344 | NGW06-CHN  | KU681198    | <i>Ovis aries</i> | Ngawa, Tibetan Qiang (aut. pref.), China         | 0 | 31.90 | 102.22 | (38)            | A | mEASIA |
| 345 | NGW07-CHN  | KU681199    | <i>Ovis aries</i> | Ngawa, Tibetan Qiang (aut. pref.), China         | 0 | 31.90 | 102.22 | (38)            | B | mEASIA |
| 346 | NGW08-CHN  | KU681200    | <i>Ovis aries</i> | Ngawa, Tibetan Qiang (aut. pref.), China         | 0 | 31.90 | 102.22 | (38)            | B | mEASIA |
| 347 | NGW09-CHN  | KU681201    | <i>Ovis aries</i> | Ngawa, Tibetan Qiang (aut. pref.), China         | 0 | 31.90 | 102.22 | (38)            | C | mEASIA |
| 348 | NGW10-CHN  | KU681202    | <i>Ovis aries</i> | Ngawa, Tibetan Qiang (aut. pref.), China         | 0 | 31.90 | 102.22 | (38)            | B | mEASIA |
| 349 | OULA1-CHN  | KU575248    | <i>Ovis aries</i> | Tibet, China                                     | 0 | 31.47 | 88.39  | GenBank         | A | mEASIA |
| 350 | OULA2-CHN  | KT148968    | <i>Ovis aries</i> | Tibet (altitude="3800 m"), China                 | 0 | 31.47 | 88.39  | GenBank         | C | mEASIA |
| 351 | QHT1-CHN   | KF938325.1  | <i>Ovis aries</i> | Qinghai-tibetan Plateau, Qinghai, China          | 0 | 36.63 | 101.78 | (30)            | A | mEASIA |
| 352 | QLW1-CHN   | KP998473.1  | <i>Ovis aries</i> | Qilian, Haibei, Qinghai, China                   | 0 | 38.20 | 99.98  | GenBank         | A | mEASIA |
| 353 | QRB1-CHN   | KF938326.1  | <i>Ovis aries</i> | Qira, Hotan, Xinjiang, China                     | 0 | 37.35 | 81.00  | (30)            | A | mEASIA |
| 354 | STHL1-CHN  | KP702285.1  | <i>Ovis aries</i> | Hulun Buir, Inner Mongolia, China                | 0 | 49.22 | 119.77 | GenBank         | B | mEASIA |
| 355 | SUN1-CHN   | KF938317.1  | <i>Ovis aries</i> | Sonid Zuoqi, Inner Mongolia, China               | 0 | 44.03 | 113.30 | (30)            | A | mEASIA |
| 356 | TAN1-CHN   | KF938336.1  | <i>Ovis aries</i> | Yanchi County, Ningxia, China                    | 0 | 37.69 | 107.07 | (30)            | A | mEASIA |
| 357 | TFB1-CHN   | KF938324.1  | <i>Ovis aries</i> | Turpan, Xinjiang, China                          | 0 | 42.57 | 89.22  | (30)            | A | mEASIA |
| 358 | TKR1-CHN   | KF938337.1  | <i>Ovis aries</i> | Taxkorgan County, Xinjiang, China                | 0 | 37.79 | 75.23  | (30)            | A | mEASIA |
| 359 | UJQ1-CHN   | KF938319.1  | <i>Ovis aries</i> | East Ujimqin, Xilin Gol, China                   | 0 | 45.82 | 117.62 | (30)            | A | mEASIA |
| 360 | UJQ2-CHN   | KR868678.1  | <i>Ovis aries</i> | East Ujimqin, Xilin Gol, China                   | 0 | 45.82 | 117.62 | (40)            | B | mEASIA |
| 361 | YCH1-CHN   | KF938338.1  | <i>Ovis aries</i> | Yecheng County, Xinjiang, China                  | 0 | 37.05 | 77.01  | (30)            | A | mEASIA |
| 362 | GUR1-IDN   | SRS335718   | <i>Ovis aries</i> | Garut, Jawa Barat, Indonesia                     | 0 | -7.30 | 107.85 | SRA             | B | mEASIA |
| 363 | GUR2-IDN   | SRS335698   | <i>Ovis aries</i> | Garut, Jawa Barat, Indonesia                     | 0 | -7.30 | 107.85 | SRA             | B | mEASIA |
| 364 | SUM51-IDN  | SRS335713   | <i>Ovis aries</i> | Sumatra, Indonesia                               | 0 | -0.66 | 100.88 | SRA             | A | mEASIA |
| 365 | SUM52-IDN  | SRR501861   | <i>Ovis aries</i> | Sumatra, Indonesia                               | 0 | -0.66 | 100.88 | SRA             | B | mEASIA |
| 366 | CHA1-IND   | SRS335727   | <i>Ovis aries</i> | Changtang, Ladakh, India                         | 0 | 34.42 | 77.56  | SRA             | C | mEASIA |
| 367 | CHA2-IND   | SRS335689   | <i>Ovis aries</i> | Changtang, Ladakh, India                         | 0 | 34.42 | 77.56  | SRA             | A | mEASIA |
| 368 | GAR1-IND   | SRS335735   | <i>Ovis aries</i> | Sundarbans, West Bengal, India                   | 0 | 22.03 | 88.83  | SRA             | A | mEASIA |
| 369 | GAR2-IND   | SRS335736   | <i>Ovis aries</i> | Sundarbans, West Bengal, India                   | 0 | 22.03 | 88.83  | SRA             | A | mEASIA |
| 370 | STHN1-MNG  | KF977847.1  | <i>Ovis aries</i> | Shandong, China                                  | 0 | 36.40 | 118.19 | (32)            | A | mEASIA |
| 371 | TIB1-TIB   | SRS335677   | <i>Ovis aries</i> | Tibetan Plateau, Chengxi, Xining, Qinghai, China | 0 | 36.63 | 101.73 | SRA             | A | mEASIA |
| 372 | TIB2-TIB   | SRS335695   | <i>Ovis aries</i> | Tibetan Plateau, Chengxi, Xining, Qinghai, China | 0 | 36.63 | 101.73 | SRA             | A | mEASIA |
| 373 | EDLB1-RUS  | 24552790*** | <i>Ovis aries</i> | Astana, Kazakhstan                               | 0 | 51.16 | 71.43  | This study, PCR | A | mEASIA |
| 374 | EDLB2-RUS  | 24552790*** | <i>Ovis aries</i> | Astana, Kazakhstan                               | 0 | 51.16 | 71.43  | This study, PCR | B | mEASIA |
| 375 | ALTM1-RUS  | 24552790*** | <i>Ovis aries</i> | Altai Mountains, Mongolia                        | 0 | 49.01 | 89.00  | This study, PCR | A | mEASIA |
| 376 | ALTM2-RUS  | 24552790*** | <i>Ovis aries</i> | Altai Mountains, Mongolia                        | 0 | 49.01 | 89.00  | This study, PCR | B | mEASIA |
| 377 | BDK1-RUS   | KF938339.1  | <i>Ovis aries</i> | Buryatia, Russia                                 | 0 | 50.85 | 105.44 | (30)            | B | mEASIA |
| 378 | BKFF1-RUS  | 24552790*** | <i>Ovis aries</i> | Baikal, Oblast Irkutsk, Russia                   | 0 | 51.88 | 104.79 | This study, PCR | B | mEASIA |
| 379 | BKFF2-RUS  | 24552790*** | <i>Ovis aries</i> | Baikal, Oblast Irkutsk, Russia                   | 0 | 51.88 | 104.79 | This study, PCR | A | mEASIA |

|     |           |             |                   |                                    |   |        |        |                 |   |        |
|-----|-----------|-------------|-------------------|------------------------------------|---|--------|--------|-----------------|---|--------|
| 380 | BUUB1-RUS | 24552790*** | <i>Ovis aries</i> | Yakutia, Russia                    | 0 | 66.85  | 130.25 | This study, PCR | A | mEASIA |
| 381 | BUUB2-RUS | 24552790*** | <i>Ovis aries</i> | Yakutia, Russia                    | 0 | 66.85  | 130.25 | This study, PCR | A | mEASIA |
| 382 | KLND1-RUS | KF938358.1  | <i>Ovis aries</i> | Kulunda, Altai Krai, Russia        | 0 | 52.56  | 78.93  | (30)            | B | mEASIA |
| 383 | KLND2-RUS | 24552790*** | <i>Ovis aries</i> | Kulunda, Altai Krai, Russia        | 0 | 52.56  | 78.93  | This study, PCR | B | mEASIA |
| 384 | KLND3-RUS | 24552790*** | <i>Ovis aries</i> | Kulunda, Altai Krai, Russia        | 0 | 52.56  | 78.93  | This study, PCR | B | mEASIA |
| 385 | TUVA1-RUS | 24552790*** | <i>Ovis aries</i> | Tuva, Russia                       | 0 | 51.69  | 95.28  | This study, PCR | A | mEASIA |
| 386 | TUVA2-RUS | 24552790*** | <i>Ovis aries</i> | Tuva, Russia                       | 0 | 51.69  | 95.28  | This study, PCR | A | mEASIA |
| 387 | TUSH1-RUS | KF938343.1  | <i>Ovis aries</i> | Sagarejo district, Georgia         | 0 | 41.73  | 45.34  | (30)            | B | mCC    |
| 388 | TUSH2-RUS | 24552790*** | <i>Ovis aries</i> | Sagarejo district, Georgia         | 0 | 41.73  | 45.34  | This study, PCR | A | mCC    |
| 389 | TUSH3-RUS | 24552790*** | <i>Ovis aries</i> | Sagarejo district, Georgia         | 0 | 41.73  | 45.34  | This study, PCR | B | mCC    |
| 390 | ANDB1-RUS | KF938340.1  | <i>Ovis aries</i> | Andi, Dagestan, Russia             | 0 | 42.79  | 46.26  | (30)            | B | mCC    |
| 391 | ANDB2-RUS | 24552790*** | <i>Ovis aries</i> | Andi, Dagestan, Russia             | 0 | 42.79  | 46.26  | This study, PCR | B | mCC    |
| 392 | ANDB3-RUS | 24552790*** | <i>Ovis aries</i> | Andi, Dagestan, Russia             | 0 | 42.79  | 46.26  | This study, PCR | A | mCC    |
| 393 | DAGM1-RUS | 24552790*** | <i>Ovis aries</i> | Dagestan, Russia                   | 0 | 42.92  | 47     | This study, PCR | B | mCC    |
| 394 | DAGM2-RUS | 24552790*** | <i>Ovis aries</i> | Dagestan, Russia                   | 0 | 42.92  | 47     | This study, PCR | B | mCC    |
| 395 | GRZN1-RUS | 24552790*** | <i>Ovis aries</i> | Grosny, Russia                     | 0 | 43.32  | 45.7   | This study, PCR | B | mCC    |
| 396 | GRZN2-RUS | 24552790*** | <i>Ovis aries</i> | Grosny, Russia                     | 0 | 43.32  | 45.7   | This study, PCR | B | mCC    |
| 397 | KALM1-RUS | 24552790*** | <i>Ovis aries</i> | Kalmykia, Russia                   | 0 | 46.81  | 45.66  | This study, PCR | B | mCC    |
| 398 | KALM2-RUS | 24552790*** | <i>Ovis aries</i> | Kalmykia, Russia                   | 0 | 46.81  | 45.66  | This study, PCR | B | mCC    |
| 399 | KRCH1-RUS | KF938351.1  | <i>Ovis aries</i> | Karachay-Cherkessia, Russia        | 0 | 44.22  | 42.05  | (30)            | B | mCC    |
| 400 | KRCH2-RUS | 24552790*** | <i>Ovis aries</i> | Karachay-Cherkessia, Russia        | 0 | 44.22  | 42.05  | This study, PCR | A | mCC    |
| 401 | KRCH3-RUS | 24552790*** | <i>Ovis aries</i> | Karachay-Cherkessia, Russia        | 0 | 44.22  | 42.05  | This study, PCR | B | mCC    |
| 402 | LEZG1-RUS | 24552790*** | <i>Ovis aries</i> | Dagestan, Russia                   | 0 | 43.04  | 46.92  | This study, PCR | A | mCC    |
| 403 | LEZG2-RUS | 24552790*** | <i>Ovis aries</i> | Dagestan, Russia                   | 0 | 43.04  | 46.92  | This study, PCR | A | mCC    |
| 404 | MANM1-RUS | 24552790*** | <i>Ovis aries</i> | Manychskaya, Oblast Rostov, Russia | 0 | 47.23  | 40.25  | This study, PCR | B | mCC    |
| 405 | MANM2-RUS | 24552790*** | <i>Ovis aries</i> | Manychskaya, Oblast Rostov, Russia | 0 | 47.23  | 40.25  | This study, PCR | B | mCC    |
| 406 | NCSN1-RUS | 24552790*** | <i>Ovis aries</i> | Stavropol, Russia                  | 0 | 45.04  | 41.98  | This study, PCR | B | mCC    |
| 407 | NCSN2-RUS | 24552790*** | <i>Ovis aries</i> | Stavropol, Russia                  | 0 | 45.04  | 41.98  | This study, PCR | B | mCC    |
| 408 | SALS1-RUS | 24552790*** | <i>Ovis aries</i> | Rostov Oblast, Russia              | 0 | 47.75  | 41.11  | This study, PCR | B | mCC    |
| 409 | SALS2-RUS | 24552790*** | <i>Ovis aries</i> | Rostov Oblast, Russia              | 0 | 47.75  | 41.11  | This study, PCR | B | mCC    |
| 410 | SOVM1-RUS | 24552790*** | <i>Ovis aries</i> | Southern Russia                    | 0 | 45.57  | 43.08  | This study, PCR | B | mCC    |
| 411 | SOVM2-RUS | 24552790*** | <i>Ovis aries</i> | Southern Russia                    | 0 | 45.57  | 43.08  | This study, PCR | B | mCC    |
| 412 | STAV1-RUS | 24552790*** | <i>Ovis aries</i> | Stavropol, Russia                  | 0 | 45.04  | 41.98  | This study, PCR | B | mCC    |
| 413 | STAV2-RUS | 24552790*** | <i>Ovis aries</i> | Stavropol, Russia                  | 0 | 45.04  | 41.98  | This study, PCR | A | mCC    |
| 414 | VOLG1-RUS | 24552790*** | <i>Ovis aries</i> | Volgograd, Russia                  | 0 | 48.66  | 44.46  | This study, PCR | A | mCC    |
| 415 | VOLG2-RUS | 24552790*** | <i>Ovis aries</i> | Volgograd, Russia                  | 0 | 48.66  | 44.46  | This study, PCR | B | mCC    |
| 416 | GLA1-AZE  | KF938345.1  | <i>Ovis aries</i> | Absheron region, Azerbaijan        | 0 | 40.39  | 49.29  | (30)            | A | mCC    |
| 417 | MZK1-AZE  | KF938344.1  | <i>Ovis aries</i> | Arran, Azerbaijan                  | 0 | 40.74  | 47.09  | (30)            | B | mCC    |
| 418 | AFS1-IRN  | SRS335703   | <i>Ovis aries</i> | Afshari, Iran                      | 0 | 35.79  | 51.47  | SRA             | B | mCC    |
| 419 | AFS2-IRN  | SRS335685   | <i>Ovis aries</i> | Afshari, Iran                      | 0 | 35.79  | 51.47  | SRA             | C | mCC    |
| 420 | OGM02-IRN | ERS154869   | <i>Ovis aries</i> | Ghare ziadin, Iran                 | 0 | 38.859 | 45.061 | SRA             | B | mCC    |
| 421 | OGM03-IRN | ERS154866   | <i>Ovis aries</i> | Ajabshir, Iran                     | 0 | 37.470 | 45.877 | SRA             | C | mCC    |
| 422 | OGM04-IRN | ERS154867   | <i>Ovis aries</i> | Ahar, Iran                         | 0 | 38.523 | 46.851 | SRA             | C | mCC    |
| 423 | OGM05-IRN | ERS154868   | <i>Ovis aries</i> | Bostan abad, Iran                  | 0 | 37.914 | 46.613 | SRA             | A | mCC    |
| 424 | OGM06-IRN | ERS154865   | <i>Ovis aries</i> | Aalmas, Iran                       | 0 | 38.153 | 44.839 | SRA             | A | mCC    |
| 425 | OGM07-IRN | ERS154864   | <i>Ovis aries</i> | Ilbolaghi, Iran                    | 0 | 39.045 | 44.928 | SRA             | A | mCC    |
| 426 | OGM10-IRN | ERS154862   | <i>Ovis aries</i> | Niaz, Iran                         | 0 | 38.393 | 47.431 | SRA             | A | mCC    |
| 427 | OGM11-IRN | ERS154863   | <i>Ovis aries</i> | Urumie, Iran                       | 0 | 37.973 | 44.953 | SRA             | B | mCC    |
| 428 | HMD01-IRQ | MF004242    | <i>Ovis aries</i> | Kurdistan region, Iraq             | 0 | 36.20  | 44.01  | (37)            | A | mCC    |
| 429 | HMD02-IRQ | MF004243    | <i>Ovis aries</i> | Kurdistan region, Iraq             | 0 | 36.20  | 44.01  | (37)            | A | mCC    |
| 430 | HMD03-IRQ | MF004244    | <i>Ovis aries</i> | Kurdistan region, Iraq             | 0 | 36.20  | 44.01  | (37)            | A | mCC    |
| 431 | KRD01-IRQ | MF004245    | <i>Ovis aries</i> | Kurdistan region, Iraq             | 0 | 36.20  | 44.01  | (37)            | B | mCC    |
| 432 | KRD02-IRQ | MF004246    | <i>Ovis aries</i> | Kurdistan region, Iraq             | 0 | 36.20  | 44.01  | (37)            | B | mCC    |
| 433 | KRS1-TUR  | HM236176.1  | <i>Ovis aries</i> | Van, Eastern Anatolia, Türkiye     | 0 | 38.51  | 43.36  | (31)            | B | mCC    |
| 434 | KRS2-TUR  | HM236177.1  | <i>Ovis aries</i> | Van, Eastern Anatolia, Türkiye     | 0 | 38.51  | 43.36  | (31)            | B | mCC    |
| 435 | KRS3-TUR  | HM236178.1  | <i>Ovis aries</i> | Van, Eastern Anatolia, Türkiye     | 0 | 38.51  | 43.36  | (31)            | C | mCC    |
| 436 | KRS4-TUR  | SRS335719   | <i>Ovis aries</i> | Van, Eastern Anatolia, Türkiye     | 0 | 38.51  | 43.36  | SRA             | C | mCC    |
| 437 | MKR1-TUR  | HM236179.1  | <i>Ovis aries</i> | Eastern Anatolia, Türkiye          | 0 | 39.95  | 41.27  | (31)            | C | mCC    |

|     |            |             |                   |                                        |      |       |       |            |   |      |
|-----|------------|-------------|-------------------|----------------------------------------|------|-------|-------|------------|---|------|
| 438 | MKR2-TUR   | HM236180.1  | <i>Ovis aries</i> | Eastern Anatolia, Türkiye              | 0    | 39.95 | 41.27 | (31)       | D | mCC  |
| 439 | MKR3-TUR   | HM236181.1  | <i>Ovis aries</i> | Eastern Anatolia, Türkiye              | 0    | 39.95 | 41.27 | (31)       | D | mCC  |
| 440 | NDZ1-TUR   | SRS335721   | <i>Ovis aries</i> | Van, Eastern Anatolia, Türkiye         | 0    | 38.51 | 43.36 | SRA        | A | mCC  |
| 441 | NDZ2-TUR   | SRS335701   | <i>Ovis aries</i> | Van, Eastern Anatolia, Türkiye         | 0    | 38.51 | 43.36 | SRA        | A | mCC  |
| 442 | TUJ1-TUR   | HM236183.1  | <i>Ovis aries</i> | Çıldır, (most Nort-East) Türkiye       | 0    | 41.13 | 43.14 | (31)       | E | mCC  |
| 443 | KARA1-UZB  | KF938348.1  | <i>Ovis aries</i> | Qorako'l, Uzbekistan                   | 0    | 47.28 | 48.03 | (30)       | B | mCC  |
| 444 | KARA2-UZB  | 24552790*** | <i>Ovis aries</i> | Qorako'l, Uzbekistan                   | 0    | 47.28 | 48.03 | This study | A | mCC  |
| 445 | KARA3-UZB  | 24552790*** | <i>Ovis aries</i> | Qorako'l, Uzbekistan                   | 0    | 47.28 | 48.03 | This study | B | mCC  |
| 446 | AWS1-ISR   | HM236182.1  | <i>Ovis aries</i> | Syro-Arabian Desert, Syria             | 0    | 34.23 | 38.75 | (31)       | E | mLEV |
| 447 | AWS2-ISR   | SRS152492   | <i>Ovis aries</i> | Syro-Arabian Desert, Syria             | 0    | 34.23 | 38.75 | SRA        | B | mLEV |
| 448 | AWS3-ISR   | SRS335723   | <i>Ovis aries</i> | Syro-Arabian Desert, Syria             | 0    | 34.23 | 38.75 | SRA        | A | mLEV |
| 449 | AWS4-ISR   | SRS004311   | <i>Ovis aries</i> | Syro-Arabian Desert, Syria             | 0    | 34.23 | 38.75 | SRA        | B | mLEV |
| 450 | AWS5-TUR   | SRS335726   | <i>Ovis aries</i> | Syro-Arabian Desert, Syria             | 0    | 34.23 | 38.75 | SRA        | B | mLEV |
| 451 | AWS6-TUR   | SRS335704   | <i>Ovis aries</i> | Syro-Arabian Desert, Syria             | 0    | 34.23 | 38.75 | SRA        | B | mLEV |
| 452 | ASF1-ISR   | EF490456.1  | <i>Ovis aries</i> | Jerusalem, Israel                      | 0    | 31.77 | 35.21 | (34)       | B | mLEV |
| 453 | ASF2-ISR   | HE577847.1  | <i>Ovis aries</i> | Jerusalem, Israel                      | 0    | 31.77 | 35.21 | (39)       | A | mLEV |
| 454 | ASF3-ISR   | HE577848.1  | <i>Ovis aries</i> | Jerusalem, Israel                      | 0    | 31.77 | 35.21 | (39)       | B | mLEV |
| 455 | ASF4-ISR   | HE577849.1  | <i>Ovis aries</i> | Jerusalem, Israel                      | 0    | 31.77 | 35.21 | (39)       | B | mLEV |
| 456 | ASF5-ISR   | HE577850.1  | <i>Ovis aries</i> | Jerusalem, Israel                      | 0    | 31.77 | 35.21 | (39)       | C | mLEV |
| 457 | aDZHU1-BGR | 24552790*** | <i>Ovis aries</i> | Dzhulyunitsa, Bulgaria                 | 7230 | 43.09 | 25.55 | This study | B | aEU  |
| 458 | aDZHU2-BGR | 24552790*** | <i>Ovis aries</i> | Dzhulyunitsa, Bulgaria                 | 7230 | 43.09 | 25.55 | This study | B | aEU  |
| 459 | aFRAN1-DEU | 24552790*** | <i>Ovis aries</i> | Frankfurt-Heddern, Germany             | 1630 | 50.15 | 8.64  | This study | A | aEU  |
| 460 | aMAIN4-DEU | 24552790*** | <i>Ovis aries</i> | Meinz, Germany                         | 1730 | 50.00 | 8.25  | This study | B | aEU  |
| 461 | aALZE1-DEU | 24552790*** | <i>Ovis aries</i> | Alzey, Germany                         | 1630 | 49.75 | 8.11  | This study | B | aEU  |
| 462 | aMAIN1-DEU | 24552790*** | <i>Ovis aries</i> | Meinz, Germany                         | 1730 | 50.00 | 8.25  | This study | B | aEU  |
| 463 | aMAIN2-DEU | 24552790*** | <i>Ovis aries</i> | Meinz, Germany                         | 1730 | 50.00 | 8.25  | This study | B | aEU  |
| 464 | aMAIN3-DEU | 24552790*** | <i>Ovis aries</i> | Meinz, Germany                         | 1730 | 50.00 | 8.25  | This study | B | aEU  |
| 465 | aHERX7-DEU | 24552790*** | <i>Ovis aries</i> | Herxheim, Germany                      | 6930 | 49.14 | 8.21  | This study | B | aEU  |
| 466 | aHERX8-DEU | 24552790*** | <i>Ovis aries</i> | Herxheim, Germany                      | 6930 | 49.14 | 8.21  | This study | B | aEU  |
| 467 | aSILG1-GBR | 24552790*** | <i>Ovis aries</i> | Silgenach, Scotland                    | 3930 | 57.10 | -7.35 | This study | B | aEU  |
| 468 | OAA73-GBR  | ERS426703   | <i>Ovis aries</i> | York, UK                               | 247  | 53.95 | -1.05 | SRA        | B | aEU  |
| 469 | OAA74-GBR  | ERS426702   | <i>Ovis aries</i> | York, UK                               | 247  | 53.95 | -1.05 | SRA        | B | aEU  |
| 470 | aORKN2-GBR | 24552790*** | <i>Ovis aries</i> | Orkney, Scotland, UK                   | 930  | 59.00 | -3.11 | This study | B | aEU  |
| 471 | aHUNG1-GBR | 24552790*** | <i>Ovis aries</i> | York, England, UK                      | 730  | 53.95 | -1.08 | This study | B | aEU  |
| 472 | aORKN1-GBR | 24552790*** | <i>Ovis aries</i> | Orkney, Scotland, UK                   | 830  | 59.00 | -3.11 | This study | B | aEU  |
| 473 | aKILP2-GBR | 24552790*** | <i>Ovis aries</i> | Kilpheder, Scotland, UK                | 830  | 57.15 | -7.40 | This study | B | aEU  |
| 474 | aKILP3-GBR | 24552790*** | <i>Ovis aries</i> | Kilpheder, Scotland, UK                | 830  | 57.15 | -7.40 | This study | B | aEU  |
| 475 | aBORN1-GBR | 24552790*** | <i>Ovis aries</i> | Bornais, Scotland, UK                  | 930  | 57.24 | -7.40 | This study | B | aEU  |
| 476 | aDANE1-GBR | 24552790*** | <i>Ovis aries</i> | Danebury, England, UK                  | 2430 | 51.10 | -1.53 | This study | B | aEU  |
| 477 | aDANE2-GBR | 24552790*** | <i>Ovis aries</i> | Danebury, England, UK                  | 2430 | 51.10 | -1.53 | This study | B | aEU  |
| 478 | aDANE3-GBR | 24552790*** | <i>Ovis aries</i> | Danebury, England, UK                  | 2430 | 51.10 | -1.53 | This study | B | aEU  |
| 479 | aHALL1-GBR | 24552790*** | <i>Ovis aries</i> | Cladh Hallan, South Uist, Scotland, UK | 2930 | 57.10 | -7.41 | This study | B | aEU  |
| 480 | aHALL2-GBR | 24552790*** | <i>Ovis aries</i> | Cladh Hallan, South Uist, Scotland, UK | 2870 | 57.10 | -7.41 | This study | B | aEU  |
| 481 | aHALL3-GBR | 24552790*** | <i>Ovis aries</i> | Cladh Hallan, South Uist, Scotland, UK | 2730 | 57.10 | -7.41 | This study | B | aEU  |
| 482 | aHALL4-GBR | 24552790*** | <i>Ovis aries</i> | Cladh Hallan, South Uist, Scotland, UK | 3190 | 57.10 | -7.41 | This study | B | aEU  |
| 483 | aHALL5-GBR | 24552790*** | <i>Ovis aries</i> | Cladh Hallan, South Uist, Scotland, UK | 3190 | 57.10 | -7.41 | This study | B | aEU  |
| 484 | aPOTT2-GBR | 24552790*** | <i>Ovis aries</i> | Potterne, England, UK                  | 2430 | 51.32 | -2.00 | This study | B | aEU  |
| 485 | aBROD1-GBR | 24552790*** | <i>Ovis aries</i> | Ness of Brodgar, Scotland, UK          | 4456 | 59.00 | -3.22 | This study | B | aEU  |
| 486 | aBROD2-GBR | 24552790*** | <i>Ovis aries</i> | Ness of Brodgar, Scotland, UK          | 4430 | 59.00 | -3.22 | This study | B | aEU  |
| 487 | aDUBL1-IRL | 24552790*** | <i>Ovis aries</i> | Moynagh Crannog, Meath, Ireland        | 880  | 53.35 | -6.33 | This study | B | aEU  |
| 488 | aDUBL2-IRL | 24552790*** | <i>Ovis aries</i> | Fishamble Street, Dublin, Ireland      | 830  | 53.35 | -6.33 | This study | B | aEU  |
| 489 | aDUBL3-IRL | 24552790*** | <i>Ovis aries</i> | Fishamble Street, Dublin, Ireland      | 830  | 53.35 | -6.33 | This study | B | aEU  |
| 490 | aTARX3-MLT | 24552790*** | <i>Ovis aries</i> | Tarxien, Malta                         | 4930 | 35.87 | 14.51 | This study | B | aEU  |
| 491 | aBLG04-SRB | 24552790*** | <i>Ovis aries</i> | Blagotin, Serbia                       | 8155 | 43.73 | 21.11 | This study | B | aEU  |
| 492 | aBLG06-SRB | 24552790*** | <i>Ovis aries</i> | Blagotin, Serbia                       | 8155 | 43.73 | 21.11 | This study | B | aEU  |
| 493 | aBLG07-SRB | 24552790*** | <i>Ovis aries</i> | Blagotin, Serbia                       | 8155 | 43.73 | 21.11 | This study | B | aEU  |
| 494 | aBLG08-SRB | 24552790*** | <i>Ovis aries</i> | Blagotin, Serbia                       | 8155 | 43.73 | 21.11 | This study | B | aEU  |
| 495 | aBLG09-SRB | 24552790*** | <i>Ovis aries</i> | Blagotin, Serbia                       | 8155 | 43.73 | 21.11 | This study | B | aEU  |



|     |             |             |                   |                               |      |        |       |                  |   |       |
|-----|-------------|-------------|-------------------|-------------------------------|------|--------|-------|------------------|---|-------|
| 496 | aBLG10-SRB  | 24552790*** | <i>Ovis aries</i> | Blagotin, Serbia              | 8155 | 43.73  | 21.11 | This study       | B | aEU   |
| 497 | aBLG11-SRB  | 24552790*** | <i>Ovis aries</i> | Blagotin, Serbia              | 8155 | 43.73  | 21.11 | This study       | B | aEU   |
| 498 | aBLG13-SRB  | 24552790*** | <i>Ovis aries</i> | Blagotin, Serbia              | 8155 | 43.73  | 21.11 | This study       | B | aEU   |
| 499 | aBLG15-SRB  | 24552790*** | <i>Ovis aries</i> | Blagotin, Serbia              | 8155 | 43.73  | 21.11 | This study       | B | aEU   |
| 500 | aBLG17-SRB  | 24552790*** | <i>Ovis aries</i> | Blagotin, Serbia              | 8155 | 43.73  | 21.11 | This study       | B | aEU   |
| 501 | aBLG18-SRB  | 24552790*** | <i>Ovis aries</i> | Blagotin, Serbia              | 8155 | 43.73  | 21.11 | This study       | B | aEU   |
| 502 | aBLG20-SRB  | 24552790*** | <i>Ovis aries</i> | Blagotin, Serbia              | 8155 | 43.73  | 21.11 | This study       | B | aEU   |
| 503 | aBUBA1-SRB  | 24552790*** | <i>Ovis aries</i> | Bubanj-Nevo Selo, Serbia      | 6296 | 43.29  | 21.84 | This study       | B | aEU   |
| 504 | aGEO01-GEO  | 24552790*** | <i>Ovis aries</i> | Tamara Fort, Kazbegi, Georgia | 830  | 42.746 | 44.64 | This study       | B | aCC   |
| 505 | aGEO02-GEO  | 24552790*** | <i>Ovis aries</i> | Tamara Fort, Kazbegi, Georgia | 830  | 42.746 | 44.64 | This study       | B | aCC   |
| 506 | aGEO03-GEO  | 24552790*** | <i>Ovis aries</i> | Tamara Fort, Kazbegi, Georgia | 830  | 42.746 | 44.64 | This study       | B | aCC   |
| 507 | aGEO04-GEO  | 24552790*** | <i>Ovis aries</i> | Tamara Fort, Kazbegi, Georgia | 830  | 42.746 | 44.64 | This study       | B | aCC   |
| 508 | aGEO05-GEO  | 24552790*** | <i>Ovis aries</i> | Tamara Fort, Kazbegi, Georgia | 830  | 42.746 | 44.64 | This study       | A | aCC   |
| 509 | aGEO06-GEO  | 24552790*** | <i>Ovis aries</i> | Tamara Fort, Kazbegi, Georgia | 830  | 42.746 | 44.64 | This study       | B | aCC   |
| 510 | aGEO07-GEO  | 24552790*** | <i>Ovis aries</i> | Tamara Fort, Kazbegi, Georgia | 830  | 42.746 | 44.64 | This study       | A | aCC   |
| 511 | aGEO08-GEO  | 24552790*** | <i>Ovis aries</i> | Tamara Fort, Kazbegi, Georgia | 830  | 42.746 | 44.64 | This study       | A | aCC   |
| 512 | aGEO10-GEO  | 24552790*** | <i>Ovis aries</i> | Tamara Fort, Kazbegi, Georgia | 830  | 42.746 | 44.64 | This study       | A | aCC   |
| 513 | aGEO11-GEO  | 24552790*** | <i>Ovis aries</i> | Tamara Fort, Kazbegi, Georgia | 830  | 42.746 | 44.64 | This study       | B | aCC   |
| 514 | aGEO13-GEO  | 24552790*** | <i>Ovis aries</i> | Tamara Fort, Kazbegi, Georgia | 830  | 42.746 | 44.64 | This study       | C | aCC   |
| 515 | aKZB02-GEO  | 24552790*** | <i>Ovis aries</i> | Tamara Fort, Kazbegi, Georgia | 830  | 42.746 | 44.64 | This study       | B | aCC   |
| 516 | aKZB10-GEO  | 24552790*** | <i>Ovis aries</i> | Tamara Fort, Kazbegi, Georgia | 830  | 42.746 | 44.64 | This study       | A | aCC   |
| 517 | aKZB11-GEO  | 24552790*** | <i>Ovis aries</i> | Tamara Fort, Kazbegi, Georgia | 830  | 42.746 | 44.64 | This study       | B | aCC   |
| 518 | aYOQN1-ISR  | 24552790*** | <i>Ovis aries</i> | Tel Yoqne'am, Israel          | 1130 | 32.63  | 35.11 | This study       | A | aLEV  |
| 519 | aYOQN4-ISR  | 24552790*** | <i>Ovis aries</i> | Tel Yoqne'am, Israel          | 1112 | 32.66  | 35.1  | This study       | B | aLEV  |
| 520 | aMIQN1-ISR  | 24552790*** | <i>Ovis aries</i> | Miqne, Israel                 | 3330 | 31.78  | 34.85 | This study       | B | aLEV  |
| 521 | aMIQN2-ISR  | 24552790*** | <i>Ovis aries</i> | Miqne, Israel                 | 3330 | 31.78  | 34.85 | This study       | A | aLEV  |
| 522 | aMIQN3-ISR  | 24552790*** | <i>Ovis aries</i> | Miqne, Israel                 | 3330 | 31.78  | 34.85 | This study       | B | aLEV  |
| 523 | aMIQN6-ISR  | 24552790*** | <i>Ovis aries</i> | Miqne, Israel                 | 3330 | 31.78  | 34.85 | This study       | A | aLEV  |
| 524 | aMASO1-ISR  | 24552790*** | <i>Ovis aries</i> | Masos, Israel                 | 3430 | 31.78  | 34.85 | This study       | A | aLEV  |
| 525 | aYOQN3-ISR  | 24552790*** | <i>Ovis aries</i> | Tel Yoqne'am, Israel          | 1130 | 32.63  | 35.11 | This study       | A | aLEV  |
| 526 | aSHIQ2-ISR  | 24552790*** | <i>Ovis aries</i> | Shiqmim, Israel               | 3530 | 31.22  | 34.51 | This study       | B | aLEV  |
| 527 | aSHIQ4-ISR  | 24552790*** | <i>Ovis aries</i> | Shiqmim, Israel               | 3530 | 31.22  | 34.51 | This study       | B | aLEV  |
| 528 | aMARM4-TUR  | 24552790*** | <i>Ovis aries</i> | Yenikapı, Türkiye             | 7814 | 41.21  | 28.94 | This study       | B | aSWAN |
| 529 | aMARM5-TUR  | 24552790*** | <i>Ovis aries</i> | Yenikapı, Türkiye             | 7814 | 41.21  | 28.94 | This study       | B | aSWAN |
| 530 | aMARM6-TUR  | 24552790*** | <i>Ovis aries</i> | Yenikapı, Türkiye             | 7814 | 41.21  | 28.94 | This study       | B | aSWAN |
| 531 | aMARM7-TUR  | 24552790*** | <i>Ovis aries</i> | Yenikapı, Türkiye             | 7882 | 41.21  | 28.94 | This study       | B | aSWAN |
| 532 | aMARM8-TUR  | 24552790*** | <i>Ovis aries</i> | Yenikapı, Türkiye             | 7882 | 41.21  | 28.94 | This study       | B | aSWAN |
| 533 | aMNT01-TUR  | 24552790*** | <i>Ovis aries</i> | Menteşe, Türkiye              | 7580 | 40.30  | 29.53 | This study       | B | aSWAN |
| 534 | aMNT02-TUR  | 24552790*** | <i>Ovis aries</i> | Menteşe, Türkiye              | 7580 | 40.30  | 29.53 | This study       | B | aSWAN |
| 535 | aMNT04-TUR  | 24552790*** | <i>Ovis aries</i> | Menteşe, Türkiye              | 7580 | 40.30  | 29.53 | This study       | B | aSWAN |
| 536 | aMNT05-TUR  | 24552790*** | <i>Ovis aries</i> | Menteşe, Türkiye              | 7580 | 40.30  | 29.53 | This study       | B | aSWAN |
| 537 | aMNT06-TUR  | 24552790*** | <i>Ovis aries</i> | Menteşe, Türkiye              | 7580 | 40.30  | 29.53 | This study       | B | aSWAN |
| 538 | aMNT07-TUR  | 24552790*** | <i>Ovis aries</i> | Menteşe, Türkiye              | 7580 | 40.30  | 29.53 | This study       | B | aSWAN |
| 539 | aMNT09-TUR  | 24552790*** | <i>Ovis aries</i> | Menteşe, Türkiye              | 7580 | 40.30  | 29.53 | This study       | B | aSWAN |
| 540 | aMNT11-TUR  | 24552790*** | <i>Ovis aries</i> | Menteşe, Türkiye              | 7580 | 40.30  | 29.53 | This study       | B | aSWAN |
| 541 | aMARM1-TUR  | 24552790*** | <i>Ovis aries</i> | Yenikapı, Türkiye             | 7882 | 41.21  | 28.94 | This study       | B | aSWAN |
| 542 | aMARM3-TUR  | 24552790*** | <i>Ovis aries</i> | Yenikapı, Türkiye             | 7882 | 41.21  | 28.94 | This study       | B | aSWAN |
| 543 | aSUBE1-TUR  | 24552790*** | <i>Ovis aries</i> | Suberde, Türkiye              | 7430 | 37.41  | 31.88 | This study       | B | aSWAN |
| 544 | aSUBE3-TUR  | 24552790*** | <i>Ovis aries</i> | Suberde, Türkiye              | 7430 | 37.41  | 31.88 | This study       | B | aSWAN |
| 545 | aCUKU1-TUR  | 24552790*** | <i>Ovis aries</i> | Çukuriçi Höyük, Türkiye       | 8430 | 37.9   | 27.35 | This study       | B | aSWAN |
| 546 | aGUV02-TUR  | 24552790*** | <i>Ovis aries</i> | Güvercinkayası, Türkiye       | 6925 | 38.35  | 34.23 | This study, WGS* | A | aGK   |
| 547 | aGUV11-TUR  | 24552790*** | <i>Ovis aries</i> | Güvercinkayası, Türkiye       | 6925 | 38.35  | 34.23 | This study, WGS* | B | aGK   |
| 548 | aGUV12-TUR  | 24552790*** | <i>Ovis aries</i> | Güvercinkayası, Türkiye       | 6925 | 38.35  | 34.23 | This study, WGS* | A | aGK   |
| 549 | aGUV13-TUR  | 24552790*** | <i>Ovis aries</i> | Güvercinkayası, Türkiye       | 6925 | 38.35  | 34.23 | This study, WGS* | A | aGK   |
| 550 | aGUV14-TUR  | 24552790*** | <i>Ovis aries</i> | Güvercinkayası, Türkiye       | 6925 | 38.35  | 34.23 | This study, WGS* | E | aGK   |
| 551 | aGUV15-TUR  | 24552790*** | <i>Ovis aries</i> | Güvercinkayası, Türkiye       | 6925 | 38.35  | 34.23 | This study, WGS* | B | aGK   |
| 552 | aGUV16-TUR  | 24552790*** | <i>Ovis aries</i> | Güvercinkayası, Türkiye       | 6925 | 38.35  | 34.23 | This study, WGS* | B | aGK   |
| 553 | aGUV178-TUR | 24552790*** | <i>Ovis aries</i> | Güvercinkayası, Türkiye       | 6925 | 38.35  | 34.23 | This study, WGS* | B | aGK   |



|     |            |             |                           |                       |       |       |       |                     |   |        |
|-----|------------|-------------|---------------------------|-----------------------|-------|-------|-------|---------------------|---|--------|
| 612 | OARG118-4  | 24552790*** | <i>Ovis gmelini/aries</i> | Asikli Höyük, Türkiye | 10150 | 38.35 | 34.23 | This study, capture | A | aAH4   |
| 613 | OARG120-4  | 24552790*** | <i>Ovis gmelini/aries</i> | Asikli Höyük, Türkiye | 10150 | 38.35 | 34.23 | This study, capture | D | aAH4   |
| 614 | OARG121-4  | 24552790*** | <i>Ovis gmelini/aries</i> | Asikli Höyük, Türkiye | 10150 | 38.35 | 34.23 | This study, capture | A | aAH4   |
| 615 | OARG125-4  | 24552790*** | <i>Ovis gmelini/aries</i> | Asikli Höyük, Türkiye | 10150 | 38.35 | 34.23 | This study, capture | Z | aAH4   |
| 616 | OARG126-4  | 24552790*** | <i>Ovis gmelini/aries</i> | Asikli Höyük, Türkiye | 10150 | 38.35 | 34.23 | This study, capture | B | aAH4   |
| 617 | OARG127-4  | 24552790*** | <i>Ovis gmelini/aries</i> | Asikli Höyük, Türkiye | 10150 | 38.35 | 34.23 | This study, capture | A | aAH4   |
| 618 | OARG132-4  | 24552790*** | <i>Ovis gmelini/aries</i> | Asikli Höyük, Türkiye | 10150 | 38.35 | 34.23 | This study, capture | B | aAH4   |
| 619 | OARG134-4  | 24552790*** | <i>Ovis gmelini/aries</i> | Asikli Höyük, Türkiye | 10150 | 38.35 | 34.23 | This study, capture | D | aAH4   |
| 620 | OARG145-5  | 24552790*** | <i>Ovis gmelini/aries</i> | Asikli Höyük, Türkiye | 10150 | 38.35 | 34.23 | This study, capture | E | aAH4** |
| 621 | OARG149-4  | 24552790*** | <i>Ovis gmelini/aries</i> | Asikli Höyük, Türkiye | 10150 | 38.35 | 34.23 | This study, capture | B | aAH4   |
| 622 | OARG151-4  | 24552790*** | <i>Ovis gmelini/aries</i> | Asikli Höyük, Türkiye | 10150 | 38.35 | 34.23 | This study, capture | D | aAH4   |
| 623 | OARG156-4  | 24552790*** | <i>Ovis gmelini/aries</i> | Asikli Höyük, Türkiye | 10150 | 38.35 | 34.23 | This study, capture | D | aAH4   |
| 624 | OARG157-4  | 24552790*** | <i>Ovis gmelini/aries</i> | Asikli Höyük, Türkiye | 10150 | 38.35 | 34.23 | This study, capture | Z | aAH4   |
| 625 | OARG164-4  | 24552790*** | <i>Ovis gmelini/aries</i> | Asikli Höyük, Türkiye | 10150 | 38.35 | 34.23 | This study, capture | B | aAH4   |
| 626 | OARG167-4  | 24552790*** | <i>Ovis gmelini/aries</i> | Asikli Höyük, Türkiye | 10150 | 38.35 | 34.23 | This study, capture | D | aAH4   |
| 627 | OARGM501-5 | 24552790*** | <i>Ovis gmelini/aries</i> | Asikli Höyük, Türkiye | 10150 | 38.35 | 34.23 | This study, WGS*    | A | aAH4** |
| 628 | aKORT1-TUR | 24552790*** | <i>Ovis gmelini</i>       | Körtik Tepe, Türkiye  | 10730 | 37.81 | 40.99 | This study          | B | aKT    |
| 629 | aKORT3-TUR | 24552790*** | <i>Ovis gmelini</i>       | Körtik Tepe, Türkiye  | 10730 | 37.81 | 40.99 | This study          | R | aKT    |

aut. pref. = autonomous prefecture

\* WGS = whole genome sequencing

\*\* These organisms are technically from layer 5 but the stratigraphic dating doesn't allow to separate them from layer 4.

\*\*\* Sequences jointly provided in a common alignment at publicly available at FigShare.

**Table S6. Temporal tests of haplogroup frequencies.** The displayed values correspond to P-values of the Bayesian, Waples, and chi-squared tests, as well as to estimated values of two statistics: ordinary  $F_{ST}$  and temporal  $F_{STT}$  (67). The values in the last column are equal to 1.0 minus the proportion of simulated  $F_{STT}$ -values that were positive, which is a measure of statistical significance equivalent to a P-value. Acronyms correspond to: mEU = modern Europe; aEU = ancient Europe; mAFR = modern Africa; aSWAN = Neolithic southwestern Anatolia including Suberde, Çukuriçi, Menteşe and Marmara regions; aGK = Güvercinkayası; aAH = Aşıklı Höyük; aAH1 = Aşıklı Höyük, layers 2A-C; aAH2 = layers 2D-J of aAH; aAH3 = layers 3A-E of aAH; aAH4 = layer 4 A-C of aAH; mLEV = modern Levant; aLEV = ancient Levant; mCC = modern Caucasus; aCC = ancient Caucasus; mEASIA = modern eastern Asia. Color scale indicates significance (scale is shown under the table).

| Comparison | $t_1-t_0$ | $N_e$  | Bayesian Test | Waples Test | Chi Test | $F_{ST}$ | $F_{STT}$ | 1-Positive $F_{STT}$ |
|------------|-----------|--------|---------------|-------------|----------|----------|-----------|----------------------|
| aAH4-aAH3  | 100       | $10^2$ | 0.977288      | 0.990992    | 0.792626 | 0.015803 | -0.199897 | 0.993615             |
|            |           | $10^3$ | 0.747533      | 0.916390    | 0.792626 | 0.015803 | -0.038577 | 0.851157             |
|            |           | $10^4$ | 0.584055      | 0.815503    | 0.792626 | 0.015803 | -0.016782 | 0.704389             |
|            |           | $10^5$ | 0.558478      | 0.795114    | 0.792626 | 0.015803 | -0.014553 | 0.678354             |
|            |           | $10^6$ | 0.55565       | 0.792880    | 0.792626 | 0.015803 | -0.014357 | 0.675983             |
| aAH3-aAH2  | 75        | $10^2$ | 0.927992      | 0.972753    | 0.592786 | 0.029150 | -0.156416 | 0.952526             |
|            |           | $10^3$ | 0.637660      | 0.792709    | 0.592786 | 0.029150 | -0.024773 | 0.660932             |
|            |           | $10^4$ | 0.508821      | 0.624751    | 0.592786 | 0.029150 | -0.008439 | 0.504183             |
|            |           | $10^5$ | 0.491944      | 0.596178    | 0.592786 | 0.029150 | -0.006804 | 0.483406             |
|            |           | $10^6$ | 0.489673      | 0.593131    | 0.592786 | 0.029150 | -0.006592 | 0.480552             |
| aAH2-aAH1  | 67        | $10^2$ | 0.746034      | 0.946317    | 0.624499 | 0.037367 | -0.135625 | 0.890604             |
|            |           | $10^3$ | 0.396955      | 0.752104    | 0.624499 | 0.037367 | -0.019663 | 0.550036             |
|            |           | $10^4$ | 0.297941      | 0.642235    | 0.624499 | 0.037367 | -0.005295 | 0.424838             |
|            |           | $10^5$ | 0.285896      | 0.626347    | 0.624499 | 0.037367 | -0.003767 | 0.408929             |
|            |           | $10^6$ | 0.284582      | 0.624687    | 0.624499 | 0.037367 | -0.003646 | 0.407423             |
| aAH1-aGK   | 833       | $10^2$ | 0.470680      | 0.463031    | 0.010028 | 0.133071 | -0.201935 | 0.908897             |
|            |           | $10^3$ | 0.353487      | 0.419814    | 0.010028 | 0.133071 | -0.065403 | 0.608901             |
|            |           | $10^4$ | 0.035997      | 0.118342    | 0.010028 | 0.133071 | 0.076156  | 0.075778             |
|            |           | $10^5$ | 0.008086      | 0.017598    | 0.010028 | 0.133071 | 0.094441  | 0.021874             |
|            |           | $10^6$ | 0.006421      | 0.010704    | 0.010028 | 0.133071 | 0.096238  | 0.018196             |
| aAH1-aSWAN | 569       | $10^2$ | 0.319386      | 0.671164    | 0.001735 | 0.327586 | -0.005822 | 0.458854             |
|            |           | $10^3$ | 0.087892      | 0.402698    | 0.001735 | 0.327586 | 0.181317  | 0.097279             |
|            |           | $10^4$ | 0.001894      | 0.029031    | 0.001735 | 0.327586 | 0.276968  | 0.002386             |
|            |           | $10^5$ | 0.000319      | 0.002867    | 0.001735 | 0.327586 | 0.288324  | 0.000454             |
|            |           | $10^6$ | 0.000293      | 0.001833    | 0.001735 | 0.327586 | 0.289519  | 0.000356             |
| aAH-aGK    | 967       | $10^2$ | 0.998752      | 0.958942    | 0.032364 | 0.071838 | -0.258883 | 0.999985             |
|            |           | $10^3$ | 0.796474      | 0.912667    | 0.032364 | 0.071838 | -0.128584 | 0.858674             |
|            |           | $10^4$ | 0.138660      | 0.371590    | 0.032364 | 0.071838 | 0.031320  | 0.141076             |
|            |           | $10^5$ | 0.015945      | 0.058564    | 0.032364 | 0.071838 | 0.052458  | 0.012847             |
|            |           | $10^6$ | 0.009609      | 0.034700    | 0.032364 | 0.071838 | 0.054609  | 0.007313             |
| aAH-aSWAN  | 703       | $10^2$ | 0.586906      | 0.773815    | 0.000115 | 0.272774 | -0.057741 | 0.754597             |
|            |           | $10^3$ | 0.184308      | 0.517110    | 0.000115 | 0.272774 | 0.110316  | 0.158855             |
|            |           | $10^4$ | 0.000901      | 0.013971    | 0.000115 | 0.272774 | 0.237278  | 0.000153             |
|            |           | $10^5$ | 0.000007      | 0.000280    | 0.000115 | 0.272774 | 0.252582  | 0.000001             |
|            |           | $10^6$ | 0.000003      | 0.000127    | 0.000115 | 0.272774 | 0.254160  | 0.000001             |
|            |           | $10^2$ | 0.036321      | 0.070304    | 0.052107 | 0.157025 | 0.112455  | 0.039291             |
|            |           | $10^3$ | 0.105660      | 0.080032    | 0.052107 | 0.157025 | 0.088619  | 0.097620             |

|            |      |                 |          |          |          |          |           |          |
|------------|------|-----------------|----------|----------|----------|----------|-----------|----------|
| aGK-aSWAN  | 264  | 10 <sup>4</sup> | 0.018691 | 0.059880 | 0.052107 | 0.157025 | 0.124508  | 0.011278 |
|            |      | 10 <sup>5</sup> | 0.009680 | 0.053038 | 0.052107 | 0.157025 | 0.129516  | 0.005343 |
|            |      | 10 <sup>6</sup> | 0.009073 | 0.052203 | 0.052107 | 0.157025 | 0.130005  | 0.004828 |
| aAH1-aCC   | 2865 | 10 <sup>2</sup> | 0.335254 | 0.333042 | 0.014521 | 0.144040 | -0.191559 | 0.894623 |
|            |      | 10 <sup>3</sup> | 0.337385 | 0.35558  | 0.014521 | 0.144040 | -0.176420 | 0.860738 |
|            |      | 10 <sup>4</sup> | 0.109875 | 0.214366 | 0.014521 | 0.144040 | 0.035237  | 0.262645 |
|            |      | 10 <sup>5</sup> | 0.010726 | 0.038793 | 0.014521 | 0.144040 | 0.094625  | 0.038349 |
|            |      | 10 <sup>6</sup> | 0.005702 | 0.016611 | 0.014521 | 0.144040 | 0.101059  | 0.023348 |
| aAH-aCC    | 2999 | 10 <sup>2</sup> | 0.946000 | 0.201441 | 0.011347 | 0.072967 | -0.258090 | 1.000000 |
|            |      | 10 <sup>3</sup> | 0.905916 | 0.363052 | 0.011347 | 0.072967 | -0.242131 | 0.986614 |
|            |      | 10 <sup>4</sup> | 0.293602 | 0.215599 | 0.011347 | 0.072967 | -0.018764 | 0.504295 |
|            |      | 10 <sup>5</sup> | 0.021394 | 0.032810 | 0.011347 | 0.072967 | 0.043015  | 0.059388 |
|            |      | 10 <sup>6</sup> | 0.007769 | 0.013109 | 0.011347 | 0.072967 | 0.049582  | 0.025314 |
| aAH1-aLEV  | 2236 | 10 <sup>2</sup> | 0.326469 | 0.164438 | 0.016688 | 0.176820 | -0.157846 | 0.811705 |
|            |      | 10 <sup>3</sup> | 0.335496 | 0.178880 | 0.016688 | 0.176820 | -0.129888 | 0.754166 |
|            |      | 10 <sup>4</sup> | 0.088457 | 0.095335 | 0.016688 | 0.176820 | 0.074376  | 0.164194 |
|            |      | 10 <sup>5</sup> | 0.015632 | 0.026390 | 0.016688 | 0.176820 | 0.121193  | 0.030709 |
|            |      | 10 <sup>6</sup> | 0.010567 | 0.017637 | 0.016688 | 0.176820 | 0.126116  | 0.021689 |
| aAH-aLEV   | 2369 | 10 <sup>2</sup> | 0.944467 | 0.872142 | 0.039355 | 0.090631 | -0.240145 | 1.000000 |
|            |      | 10 <sup>3</sup> | 0.877202 | 0.856277 | 0.039355 | 0.090631 | -0.210529 | 0.962259 |
|            |      | 10 <sup>4</sup> | 0.249853 | 0.412315 | 0.039355 | 0.090631 | 0.005328  | 0.356535 |
|            |      | 10 <sup>5</sup> | 0.035418 | 0.072899 | 0.039355 | 0.090631 | 0.054588  | 0.054865 |
|            |      | 10 <sup>6</sup> | 0.02092  | 0.042379 | 0.039355 | 0.090631 | 0.059701  | 0.032421 |
| aGK-aCC    | 2032 | 10 <sup>2</sup> | 0.913473 | 0.783379 | 0.519728 | 0.013034 | -0.274736 | 0.998123 |
|            |      | 10 <sup>3</sup> | 0.889526 | 0.805982 | 0.519728 | 0.013034 | -0.242027 | 0.982299 |
|            |      | 10 <sup>4</sup> | 0.687000 | 0.731600 | 0.519728 | 0.013034 | -0.064884 | 0.830024 |
|            |      | 10 <sup>5</sup> | 0.51059  | 0.575831 | 0.519728 | 0.013034 | -0.023334 | 0.678761 |
|            |      | 10 <sup>6</sup> | 0.474942 | 0.526499 | 0.519728 | 0.013034 | -0.018862 | 0.641894 |
| aGK-aLEV   | 1402 | 10 <sup>2</sup> | 0.807821 | 0.947467 | 0.475291 | 0.042654 | -0.243745 | 0.977658 |
|            |      | 10 <sup>3</sup> | 0.758741 | 0.928462 | 0.475291 | 0.042654 | -0.187414 | 0.903367 |
|            |      | 10 <sup>4</sup> | 0.413835 | 0.709851 | 0.475291 | 0.042654 | -0.029281 | 0.515479 |
|            |      | 10 <sup>5</sup> | 0.266304 | 0.513654 | 0.475291 | 0.042654 | -3.46E-05 | 0.338944 |
|            |      | 10 <sup>6</sup> | 0.246397 | 0.479430 | 0.475291 | 0.042654 | 0.003066  | 0.314173 |
| aSWAN-aCC  | 2296 | 10 <sup>2</sup> | 0.009854 | 0.013191 | 0.008676 | 0.226277 | 0.211623  | 0.009854 |
|            |      | 10 <sup>3</sup> | 0.028632 | 0.018498 | 0.008676 | 0.226277 | 0.189011  | 0.030089 |
|            |      | 10 <sup>4</sup> | 0.045553 | 0.015401 | 0.008676 | 0.226277 | 0.158900  | 0.041681 |
|            |      | 10 <sup>5</sup> | 0.006310 | 0.010088 | 0.008676 | 0.226277 | 0.189285  | 0.004266 |
|            |      | 10 <sup>6</sup> | 0.003427 | 0.008835 | 0.008676 | 0.226277 | 0.193491  | 0.002216 |
| aSWAN-aLEV | 1666 | 10 <sup>2</sup> | 0.004957 | 0.001456 | 0.000933 | 0.333333 | 0.325876  | 0.004957 |
|            |      | 10 <sup>3</sup> | 0.040184 | 0.002202 | 0.000933 | 0.333333 | 0.281854  | 0.039643 |
|            |      | 10 <sup>4</sup> | 0.019075 | 0.001610 | 0.000933 | 0.333333 | 0.270106  | 0.015866 |
|            |      | 10 <sup>5</sup> | 0.002677 | 0.001042 | 0.000933 | 0.333333 | 0.291092  | 0.002146 |
|            |      | 10 <sup>6</sup> | 0.001673 | 0.000945 | 0.000933 | 0.333333 | 0.293938  | 0.001332 |
| aLEV-aCC   | 629  | 10 <sup>2</sup> | 0.936086 | 0.670453 | 0.590095 | 0.014493 | -0.304783 | 0.985459 |
|            |      | 10 <sup>3</sup> | 0.831622 | 0.668553 | 0.590095 | 0.014493 | -0.158929 | 0.849264 |
|            |      | 10 <sup>4</sup> | 0.649254 | 0.618328 | 0.590095 | 0.014493 | -0.045676 | 0.681156 |
|            |      | 10 <sup>5</sup> | 0.596209 | 0.593890 | 0.590095 | 0.014493 | -0.031971 | 0.631008 |
|            |      | 10 <sup>6</sup> | 0.588899 | 0.590492 | 0.590095 | 0.014493 | -0.030462 | 0.623672 |
| aAH1-aEU   | 1772 | 10 <sup>2</sup> | 0.326209 | 0.784224 | 1.33E-06 | 0.304853 | -0.029480 | 0.538837 |
|            |      | 10 <sup>3</sup> | 0.226365 | 0.742120 | 1.33E-06 | 0.304853 | 0.047062  | 0.328066 |
|            |      | 10 <sup>4</sup> | 0.004819 | 0.183634 | 1.33E-06 | 0.304853 | 0.244236  | 0.007574 |
|            |      | 10 <sup>5</sup> | 0.000032 | 0.000408 | 1.33E-06 | 0.304853 | 0.272489  | 0.000051 |

|           |      |                 |          |          |          |          |           |          |
|-----------|------|-----------------|----------|----------|----------|----------|-----------|----------|
|           |      | 10 <sup>6</sup> | 0.000019 | 2.84E-06 | 1.33E-06 | 0.304853 | 0.275872  | 0.000013 |
| aAH-aEU   | 1906 | 10 <sup>2</sup> | 0.663850 | 0.794760 | 7.20E-07 | 0.250141 | -0.080813 | 0.860967 |
|           |      | 10 <sup>3</sup> | 0.468419 | 0.748442 | 7.20E-07 | 0.250141 | -0.025705 | 0.574952 |
|           |      | 10 <sup>4</sup> | 0.01308  | 0.098409 | 7.20E-07 | 0.250141 | 0.195540  | 0.005145 |
|           |      | 10 <sup>5</sup> | 0.000000 | 1.27E-05 | 7.20E-07 | 0.250141 | 0.000000  | 1.000000 |
|           |      | 10 <sup>6</sup> | 0.000000 | 7.00E-07 | 7.20E-07 | 0.250141 | 0.000000  | 1.000000 |
| aGK-aEU   | 939  | 10 <sup>2</sup> | 0.647277 | 0.926195 | 0.002175 | 0.130352 | -0.156280 | 0.760795 |
|           |      | 10 <sup>3</sup> | 0.243480 | 0.863911 | 0.002175 | 0.130352 | -0.007463 | 0.307073 |
|           |      | 10 <sup>4</sup> | 0.025516 | 0.299533 | 0.002175 | 0.130352 | 0.094002  | 0.030355 |
|           |      | 10 <sup>5</sup> | 0.001687 | 0.012327 | 0.002175 | 0.130352 | 0.110150  | 0.002360 |
|           |      | 10 <sup>6</sup> | 0.001051 | 0.002752 | 0.002175 | 0.130352 | 0.111971  | 0.001193 |
| aSWAN-aEU | 1202 | 10 <sup>2</sup> | 0.095088 | 0.516295 | 0.532846 | 0.010753 | 0.003143  | 0.095088 |
|           |      | 10 <sup>3</sup> | 0.138068 | 0.533853 | 0.532846 | 0.010753 | -0.000607 | 0.137406 |
|           |      | 10 <sup>4</sup> | 0.271066 | 0.534541 | 0.532846 | 0.010753 | -0.000508 | 0.249173 |
|           |      | 10 <sup>5</sup> | 0.287265 | 0.533250 | 0.532846 | 0.010753 | 0.001587  | 0.228659 |
|           |      | 10 <sup>6</sup> | 0.277245 | 0.532892 | 0.532846 | 0.010753 | 0.001958  | 0.210484 |
| aCC-aEU   | 1093 | 10 <sup>2</sup> | 0.026978 | 0.012666 | 0.000141 | 0.195894 | 0.158676  | 0.026978 |
|           |      | 10 <sup>3</sup> | 0.055692 | 0.012328 | 0.000141 | 0.195894 | 0.136505  | 0.057816 |
|           |      | 10 <sup>4</sup> | 0.013899 | 0.000737 | 0.000141 | 0.195894 | 0.156515  | 0.011085 |
|           |      | 10 <sup>5</sup> | 0.001012 | 0.000180 | 0.000141 | 0.195894 | 0.170393  | 0.000630 |
|           |      | 10 <sup>6</sup> | 0.000516 | 0.000144 | 0.000141 | 0.195894 | 0.172128  | 0.000305 |
| aLEV-aEU  | 464  | 10 <sup>2</sup> | 0.022342 | 0.004419 | 7.96E-06 | 0.297313 | 0.265737  | 0.022328 |
|           |      | 10 <sup>3</sup> | 0.036821 | 0.000476 | 7.96E-06 | 0.297313 | 0.239401  | 0.031808 |
|           |      | 10 <sup>4</sup> | 0.001832 | 1.89E-05 | 7.96E-06 | 0.297313 | 0.261199  | 0.001090 |
|           |      | 10 <sup>5</sup> | 0.000288 | 8.69E-06 | 7.96E-06 | 0.297313 | 0.266580  | 0.000165 |
|           |      | 10 <sup>6</sup> | 0.000237 | 8.03E-06 | 7.96E-06 | 0.297313 | 0.267191  | 0.000112 |
| aAH1-mEU  | 3142 | 10 <sup>2</sup> | 0.330874 | 0.602306 | 0.497187 | 0.221847 | -0.112826 | 0.753474 |
|           |      | 10 <sup>3</sup> | 0.329992 | 0.608551 | 0.497187 | 0.221847 | -0.084752 | 0.621747 |
|           |      | 10 <sup>4</sup> | 0.020594 | 0.268283 | 0.497187 | 0.221847 | 0.141577  | 0.061935 |
|           |      | 10 <sup>5</sup> | 0.000049 | 0.000234 | 0.497187 | 0.221847 | 0.189269  | 0.000866 |
|           |      | 10 <sup>6</sup> | 0.000002 | 0.014579 | 0.497187 | 0.221847 | 0.195550  | 0.000200 |
| aAH-mEU   | 3276 | 10 <sup>2</sup> | 0.891920 | 0.874108 | 0.422497 | 0.163739 | -0.167134 | 0.998010 |
|           |      | 10 <sup>3</sup> | 0.835330 | 0.868614 | 0.422497 | 0.163739 | -0.151982 | 0.947743 |
|           |      | 10 <sup>4</sup> | 0.088420 | 0.399955 | 0.422497 | 0.163739 | 0.087575  | 0.085454 |
|           |      | 10 <sup>5</sup> | 0.000010 | 0.000151 | 0.422497 | 0.163739 | 0.150241  | 0.000012 |
|           |      | 10 <sup>6</sup> | 0.000000 | 0.002584 | 0.422497 | 0.163739 | 0.000000  | 1.000000 |
| aGK-mEU   | 2308 | 10 <sup>2</sup> | 0.883917 | 0.972997 | 0.000131 | 0.044049 | -0.242748 | 0.977847 |
|           |      | 10 <sup>3</sup> | 0.706501 | 0.969088 | 0.000131 | 0.044049 | -0.177010 | 0.904047 |
|           |      | 10 <sup>4</sup> | 0.280232 | 0.804360 | 0.000131 | 0.044049 | -0.015420 | 0.484236 |
|           |      | 10 <sup>5</sup> | 0.053496 | 0.146716 | 0.000131 | 0.044049 | 0.024165  | 0.135949 |
|           |      | 10 <sup>6</sup> | 0.023905 | 0.001626 | 0.000131 | 0.044049 | 0.028859  | 0.087156 |
| aSWAN-mEU | 2572 | 10 <sup>2</sup> | 0.005099 | 0.107774 | 0.103436 | 0.069486 | 0.061880  | 0.005099 |
|           |      | 10 <sup>3</sup> | 0.158595 | 0.123086 | 0.103436 | 0.069486 | -0.001492 | 0.156976 |
|           |      | 10 <sup>4</sup> | 0.372466 | 0.121218 | 0.103436 | 0.069486 | 0.011815  | 0.283566 |
|           |      | 10 <sup>5</sup> | 0.169280 | 0.110139 | 0.103436 | 0.069486 | 0.047683  | 0.071965 |
|           |      | 10 <sup>6</sup> | 0.107873 | 0.104370 | 0.103436 | 0.069486 | 0.052549  | 0.042558 |
| aCC-mEU   | 277  | 10 <sup>2</sup> | 0.622206 | 0.827680 | 9.31E-05 | 0.086857 | -0.173453 | 0.804994 |
|           |      | 10 <sup>3</sup> | 0.174694 | 0.531602 | 9.31E-05 | 0.086857 | 0.016158  | 0.283068 |
|           |      | 10 <sup>4</sup> | 0.022850 | 0.056602 | 9.31E-05 | 0.086857 | 0.060168  | 0.066822 |
|           |      | 10 <sup>5</sup> | 0.010224 | 0.000894 | 9.31E-05 | 0.086857 | 0.065485  | 0.039525 |
|           |      | 10 <sup>6</sup> | 0.009308 | 0.000128 | 9.31E-05 | 0.086857 | 0.066039  | 0.036105 |
| aLEV-mEU  | 906  | 10 <sup>2</sup> | 0.677555 | 0.477447 | 0.001420 | 0.158670 | -0.160135 | 0.828819 |

|            |      |                 |          |          |          |          |           |          |
|------------|------|-----------------|----------|----------|----------|----------|-----------|----------|
|            |      | 10 <sup>3</sup> | 0.202507 | 0.372778 | 0.001420 | 0.158670 | 0.017789  | 0.305784 |
|            |      | 10 <sup>4</sup> | 0.022270 | 0.066901 | 0.001420 | 0.158670 | 0.112022  | 0.052079 |
|            |      | 10 <sup>5</sup> | 0.004352 | 0.004199 | 0.001420 | 0.158670 | 0.127861  | 0.006564 |
|            |      | 10 <sup>6</sup> | 0.003750 | 0.001626 | 0.001420 | 0.158670 | 0.129428  | 0.003887 |
| aEU-mEU    | 1370 | 10 <sup>2</sup> | 0.031482 | 0.471236 | 0.032267 | 0.042238 | 0.011383  | 0.071660 |
|            |      | 10 <sup>3</sup> | 0.249084 | 0.419808 | 0.032267 | 0.042238 | -0.039635 | 0.480456 |
|            |      | 10 <sup>4</sup> | 0.307139 | 0.138622 | 0.032267 | 0.042238 | 0.008062  | 0.324812 |
|            |      | 10 <sup>5</sup> | 0.080757 | 0.044465 | 0.032267 | 0.042238 | 0.032162  | 0.037775 |
|            |      | 10 <sup>6</sup> | 0.037468 | 0.033558 | 0.032267 | 0.042238 | 0.034995  | 0.015239 |
| aAH1-mAFR  | 3142 | 10 <sup>2</sup> | 0.334869 | 0.855281 | 7.91E-05 | 0.281298 | -0.054227 | 0.600404 |
|            |      | 10 <sup>3</sup> | 0.334762 | 0.855281 | 7.91E-05 | 0.281298 | -0.054386 | 0.600316 |
|            |      | 10 <sup>4</sup> | 0.333823 | 0.855281 | 7.91E-05 | 0.281298 | -0.054022 | 0.599089 |
|            |      | 10 <sup>5</sup> | 0.334721 | 0.855281 | 7.91E-05 | 0.281298 | -0.054051 | 0.599821 |
|            |      | 10 <sup>6</sup> | 0.334418 | 0.855281 | 7.91E-05 | 0.281298 | -0.054229 | 0.600187 |
| aAH-mAFR   | 3276 | 10 <sup>2</sup> | 0.678118 | 0.602796 | 0.003069 | 0.229026 | -0.101866 | 0.934657 |
|            |      | 10 <sup>3</sup> | 0.596076 | 0.686153 | 0.003069 | 0.229026 | -0.088058 | 0.838479 |
|            |      | 10 <sup>4</sup> | 0.048778 | 0.254546 | 0.003069 | 0.229026 | 0.150167  | 0.037931 |
|            |      | 10 <sup>5</sup> | 0.000001 | 5.99E-05 | 0.003069 | 0.229026 | 0.214047  | 0.000000 |
|            |      | 10 <sup>6</sup> | 0.000000 | 4.47E-05 | 0.003069 | 0.229026 | 0.000000  | 1.000000 |
| aGK-mAFR   | 2308 | 10 <sup>2</sup> | 0.659855 | 0.917749 | 8.31E-05 | 0.111418 | -0.176622 | 0.821122 |
|            |      | 10 <sup>3</sup> | 0.413085 | 0.918063 | 8.31E-05 | 0.111418 | -0.111285 | 0.583799 |
|            |      | 10 <sup>4</sup> | 0.070127 | 0.670748 | 8.31E-05 | 0.111418 | 0.059346  | 0.097250 |
|            |      | 10 <sup>5</sup> | 0.001346 | 0.038819 | 8.31E-05 | 0.111418 | 0.090787  | 0.003492 |
|            |      | 10 <sup>6</sup> | 0.000529 | 0.000356 | 8.31E-05 | 0.111418 | 0.095242  | 0.000529 |
| aSWAN-mAFR | 2572 | 10 <sup>2</sup> | 0.098344 | 0.637284 | 0.653683 | 0.017341 | 0.002516  | 0.179729 |
|            |      | 10 <sup>3</sup> | 0.113739 | 0.661091 | 0.653683 | 0.017341 | 0.000363  | 0.171230 |
|            |      | 10 <sup>4</sup> | 0.380829 | 0.661636 | 0.653683 | 0.017341 | -0.010247 | 0.491491 |
|            |      | 10 <sup>5</sup> | 0.373541 | 0.656609 | 0.653683 | 0.017341 | 0.000142  | 0.405179 |
|            |      | 10 <sup>6</sup> | 0.342202 | 0.654083 | 0.653683 | 0.017341 | 0.002814  | 0.329213 |
| aCC-mAFR   | 277  | 10 <sup>2</sup> | 0.445435 | 0.735510 | 1.26E-05 | 0.171900 | -0.09522  | 0.562753 |
|            |      | 10 <sup>3</sup> | 0.038705 | 0.359142 | 1.26E-05 | 0.171900 | 0.111404  | 0.059109 |
|            |      | 10 <sup>4</sup> | 0.000350 | 0.008747 | 1.26E-05 | 0.171900 | 0.145285  | 0.000894 |
|            |      | 10 <sup>5</sup> | 0.000185 | 5.53E-05 | 1.26E-05 | 0.171900 | 0.150225  | 0.000170 |
|            |      | 10 <sup>6</sup> | 0.000189 | 1.53E-05 | 1.26E-05 | 0.171900 | 0.150724  | 0.000157 |
| aLEV-mAFR  | 906  | 10 <sup>2</sup> | 0.501641 | 0.592598 | 1.12E-06 | 0.270045 | -0.049791 | 0.501888 |
|            |      | 10 <sup>3</sup> | 0.099049 | 0.471216 | 1.12E-06 | 0.270045 | 0.148160  | 0.104064 |
|            |      | 10 <sup>4</sup> | 0.000939 | 0.046157 | 1.12E-06 | 0.270045 | 0.228161  | 0.001518 |
|            |      | 10 <sup>5</sup> | 0.000086 | 3.53E-05 | 1.12E-06 | 0.270045 | 0.240797  | 0.000054 |
|            |      | 10 <sup>6</sup> | 0.000086 | 1.15E-06 | 1.12E-06 | 0.270045 | 0.242335  | 0.000060 |
| aEU-mAFR   | 1370 | 10 <sup>2</sup> | 0.566425 | 0.497332 | 0.579934 | 0.004243 | -0.032658 | 0.669383 |
|            |      | 10 <sup>3</sup> | 0.596336 | 0.578454 | 0.579934 | 0.004243 | -0.030136 | 0.666617 |
|            |      | 10 <sup>4</sup> | 0.703526 | 0.584184 | 0.579934 | 0.004243 | -0.016708 | 0.771546 |
|            |      | 10 <sup>5</sup> | 0.668180 | 0.581695 | 0.579934 | 0.004243 | -0.006029 | 0.673814 |
|            |      | 10 <sup>6</sup> | 0.646175 | 0.580180 | 0.579934 | 0.004243 | -0.003939 | 0.614856 |
| aAH1-mCC   | 3142 | 10 <sup>2</sup> | 0.478616 | 0.374354 | 2.85E-05 | 0.115731 | -0.219699 | 0.945627 |
|            |      | 10 <sup>3</sup> | 0.551112 | 0.398985 | 2.85E-05 | 0.115731 | -0.212710 | 0.935977 |
|            |      | 10 <sup>4</sup> | 0.182752 | 0.255549 | 2.85E-05 | 0.115731 | 0.013531  | 0.330918 |
|            |      | 10 <sup>5</sup> | 0.007781 | 0.010387 | 2.85E-05 | 0.115731 | 0.079803  | 0.029276 |
|            |      | 10 <sup>6</sup> | 0.002340 | 0.000103 | 2.85E-05 | 0.115731 | 0.086906  | 0.013313 |
| aAH-mCC    | 3276 | 10 <sup>2</sup> | 0.995744 | 0.082519 | 5.27E-06 | 0.054903 | -0.276075 | 1.000000 |
|            |      | 10 <sup>3</sup> | 0.972375 | 0.210325 | 5.27E-06 | 0.054903 | -0.263572 | 0.994099 |
|            |      | 10 <sup>4</sup> | 0.424749 | 0.137062 | 5.27E-06 | 0.054903 | -0.030500 | 0.603735 |

|              |      |                 |          |          |          |          |           |          |
|--------------|------|-----------------|----------|----------|----------|----------|-----------|----------|
|              |      | 10 <sup>5</sup> | 0.007215 | 0.004378 | 5.27E-06 | 0.054903 | 0.038161  | 0.021178 |
|              |      | 10 <sup>6</sup> | 0.000149 | 2.32E-05 | 5.27E-06 | 0.054903 | 0.045522  | 0.001048 |
| aGK-mCC      | 2308 | 10 <sup>2</sup> | 0.919439 | 0.682435 | 0.238651 | 0.013191 | -0.275527 | 0.998430 |
|              |      | 10 <sup>3</sup> | 0.920239 | 0.723100 | 0.238651 | 0.013191 | -0.254517 | 0.987026 |
|              |      | 10 <sup>4</sup> | 0.769819 | 0.677459 | 0.238651 | 0.013191 | -0.058953 | 0.857860 |
|              |      | 10 <sup>5</sup> | 0.475893 | 0.452375 | 0.238651 | 0.013191 | -0.009676 | 0.564356 |
|              |      | 10 <sup>6</sup> | 0.385074 | 0.273005 | 0.238651 | 0.013191 | -0.004568 | 0.463164 |
| aSWAN-mCC    | 2572 | 10 <sup>2</sup> | 0.019847 | 0.054992 | 0.012921 | 0.207275 | 0.178630  | 0.019847 |
|              |      | 10 <sup>3</sup> | 0.089899 | 0.073938 | 0.012921 | 0.207275 | 0.102067  | 0.094538 |
|              |      | 10 <sup>4</sup> | 0.104172 | 0.060592 | 0.012921 | 0.207275 | 0.130294  | 0.061365 |
|              |      | 10 <sup>5</sup> | 0.002991 | 0.024994 | 0.012921 | 0.207275 | 0.182422  | 0.000569 |
|              |      | 10 <sup>6</sup> | 0.000733 | 0.014263 | 0.012921 | 0.207275 | 0.188006  | 0.000085 |
| aCC-mCC      | 277  | 10 <sup>2</sup> | 0.982824 | 0.940177 | 0.919529 | 0.002580 | -0.297094 | 0.995907 |
|              |      | 10 <sup>3</sup> | 0.982984 | 0.940177 | 0.919529 | 0.002580 | -0.297367 | 0.995951 |
|              |      | 10 <sup>4</sup> | 0.982668 | 0.940177 | 0.919529 | 0.002580 | -0.297290 | 0.995816 |
|              |      | 10 <sup>5</sup> | 0.982859 | 0.940177 | 0.919529 | 0.002580 | -0.297213 | 0.995889 |
|              |      | 10 <sup>6</sup> | 0.982800 | 0.940177 | 0.919529 | 0.002580 | -0.297089 | 0.995903 |
| aLEV-mCC     | 906  | 10 <sup>2</sup> | 0.939951 | 0.794139 | 0.639517 | 0.022882 | -0.298779 | 0.987936 |
|              |      | 10 <sup>3</sup> | 0.867331 | 0.799285 | 0.639517 | 0.022882 | -0.183474 | 0.906128 |
|              |      | 10 <sup>4</sup> | 0.617755 | 0.734056 | 0.639517 | 0.022882 | -0.030156 | 0.651658 |
|              |      | 10 <sup>5</sup> | 0.477699 | 0.657707 | 0.639517 | 0.022882 | -0.010129 | 0.480103 |
|              |      | 10 <sup>6</sup> | 0.456084 | 0.641542 | 0.639517 | 0.022882 | -0.008038 | 0.453931 |
| aEU-mCC      | 1370 | 10 <sup>2</sup> | 0.036986 | 0.013134 | 3.72E-05 | 0.180313 | 0.131317  | 0.036988 |
|              |      | 10 <sup>3</sup> | 0.118855 | 0.024297 | 3.72E-05 | 0.180313 | 0.063871  | 0.123160 |
|              |      | 10 <sup>4</sup> | 0.022734 | 0.002012 | 3.72E-05 | 0.180313 | 0.139223  | 0.012373 |
|              |      | 10 <sup>5</sup> | 0.000028 | 0.000123 | 3.72E-05 | 0.180313 | 0.167318  | 0.000011 |
|              |      | 10 <sup>6</sup> | 0.000001 | 4.35E-05 | 3.72E-05 | 0.180313 | 0.170273  | 0.000001 |
| aAH1-mEASIA  | 3142 | 10 <sup>2</sup> | 0.334447 | 0.156327 | 0.000172 | 0.166637 | -0.169084 | 0.857416 |
|              |      | 10 <sup>3</sup> | 0.497643 | 0.176145 | 0.000172 | 0.166637 | -0.167008 | 0.882101 |
|              |      | 10 <sup>4</sup> | 0.106302 | 0.099614 | 0.000172 | 0.166637 | 0.064364  | 0.189362 |
|              |      | 10 <sup>5</sup> | 0.002103 | 0.000509 | 0.000172 | 0.166637 | 0.131861  | 0.008525 |
|              |      | 10 <sup>6</sup> | 0.000315 | 6.40E-07 | 0.000172 | 0.166637 | 0.139072  | 0.003249 |
| aAH-mEASIA   | 3276 | 10 <sup>2</sup> | 0.946164 | 0.027848 | 0.000141 | 0.084524 | -0.246514 | 1.000000 |
|              |      | 10 <sup>3</sup> | 0.920585 | 0.096936 | 0.000141 | 0.084524 | -0.233994 | 0.985741 |
|              |      | 10 <sup>4</sup> | 0.324041 | 0.038782 | 0.000141 | 0.084524 | -0.000177 | 0.395917 |
|              |      | 10 <sup>5</sup> | 0.001036 | 6.19E-05 | 0.000141 | 0.084524 | 0.069098  | 0.001995 |
|              |      | 10 <sup>6</sup> | 0.000000 | 1.44E-06 | 0.000141 | 0.084524 | 0.000000  | 1.000000 |
| aGK-mEASIA   | 2308 | 10 <sup>2</sup> | 0.567424 | 0.513515 | 0.002281 | 0.069994 | -0.217600 | 0.939035 |
|              |      | 10 <sup>3</sup> | 0.703854 | 0.548116 | 0.002281 | 0.069994 | -0.214118 | 0.934235 |
|              |      | 10 <sup>4</sup> | 0.274435 | 0.363645 | 0.002281 | 0.069994 | -0.002571 | 0.376077 |
|              |      | 10 <sup>5</sup> | 0.023119 | 0.052637 | 0.002281 | 0.069994 | 0.048164  | 0.047678 |
|              |      | 10 <sup>6</sup> | 0.007720 | 0.004786 | 0.002281 | 0.069994 | 0.053450  | 0.021236 |
| aSWAN-mEASIA | 2572 | 10 <sup>2</sup> | 0.004941 | 0.001582 | 6.88E-06 | 0.361502 | 0.346747  | 0.009926 |
|              |      | 10 <sup>3</sup> | 0.119767 | 0.002599 | 6.88E-06 | 0.361502 | 0.187185  | 0.151100 |
|              |      | 10 <sup>4</sup> | 0.015838 | 0.001542 | 6.88E-06 | 0.361502 | 0.281531  | 0.011277 |
|              |      | 10 <sup>5</sup> | 0.000036 | 0.000102 | 6.88E-06 | 0.361502 | 0.337787  | 0.000007 |
|              |      | 10 <sup>6</sup> | 0.000001 | 1.08E-05 | 6.88E-06 | 0.361502 | 0.343549  | 0.000001 |
| aCC-mEASIA   | 277  | 10 <sup>2</sup> | 0.946425 | 0.916346 | 0.346724 | 0.028520 | -0.279528 | 0.980562 |
|              |      | 10 <sup>3</sup> | 0.573377 | 0.765592 | 0.346724 | 0.028520 | -0.060193 | 0.708534 |
|              |      | 10 <sup>4</sup> | 0.259225 | 0.458453 | 0.346724 | 0.028520 | -4.04E-05 | 0.348282 |
|              |      | 10 <sup>5</sup> | 0.200424 | 0.360183 | 0.346724 | 0.028520 | 0.006234  | 0.263517 |
|              |      | 10 <sup>6</sup> | 0.192803 | 0.348114 | 0.346724 | 0.028520 | 0.006895  | 0.253428 |



|             |      |                 |          |          |          |          |           |          |
|-------------|------|-----------------|----------|----------|----------|----------|-----------|----------|
| aLEV-mEASIA | 906  | 10 <sup>2</sup> | 0.985044 | 0.505658 | 0.432619 | 0.015091 | -0.305050 | 0.986021 |
|             |      | 10 <sup>3</sup> | 0.946351 | 0.516151 | 0.432619 | 0.015091 | -0.193215 | 0.923904 |
|             |      | 10 <sup>4</sup> | 0.821830 | 0.479467 | 0.432619 | 0.015091 | -0.036883 | 0.719174 |
|             |      | 10 <sup>5</sup> | 0.741950 | 0.441132 | 0.432619 | 0.015091 | -0.016622 | 0.587439 |
|             |      | 10 <sup>6</sup> | 0.727870 | 0.433557 | 0.432619 | 0.015091 | -0.014586 | 0.566594 |
| aAH1-mLEV   | 3142 | 10 <sup>2</sup> | 0.479855 | 0.563700 | 0.080555 | 0.121951 | -0.213723 | 0.912532 |
|             |      | 10 <sup>3</sup> | 0.467355 | 0.583356 | 0.080555 | 0.121951 | -0.201989 | 0.887512 |
|             |      | 10 <sup>4</sup> | 0.221358 | 0.411244 | 0.080555 | 0.121951 | 0.003313  | 0.374138 |
|             |      | 10 <sup>5</sup> | 0.048115 | 0.139617 | 0.080555 | 0.121951 | 0.066777  | 0.085020 |
|             |      | 10 <sup>6</sup> | 0.031513 | 0.086617 | 0.080555 | 0.121951 | 0.073586  | 0.058117 |
| aAH-mLEV    | 3276 | 10 <sup>2</sup> | 0.997321 | 0.116317 | 0.031742 | 0.070742 | -0.260339 | 1.000000 |
|             |      | 10 <sup>3</sup> | 0.977088 | 0.261446 | 0.031742 | 0.070742 | -0.248796 | 0.990589 |
|             |      | 10 <sup>4</sup> | 0.500210 | 0.185761 | 0.031742 | 0.070742 | -0.031462 | 0.573373 |
|             |      | 10 <sup>5</sup> | 0.108795 | 0.057278 | 0.031742 | 0.070742 | 0.034992  | 0.105613 |
|             |      | 10 <sup>6</sup> | 0.062594 | 0.034305 | 0.031742 | 0.070742 | 0.042108  | 0.055340 |
| aGK-mLEV    | 2308 | 10 <sup>2</sup> | 0.962358 | 0.713717 | 0.609141 | 0.008116 | -0.280020 | 0.998142 |
|             |      | 10 <sup>3</sup> | 0.947376 | 0.745873 | 0.609141 | 0.008116 | -0.253676 | 0.990445 |
|             |      | 10 <sup>4</sup> | 0.866015 | 0.708127 | 0.609141 | 0.008116 | -0.078563 | 0.924135 |
|             |      | 10 <sup>5</sup> | 0.780602 | 0.634153 | 0.609141 | 0.008116 | -0.033936 | 0.853323 |
|             |      | 10 <sup>6</sup> | 0.761868 | 0.612134 | 0.609141 | 0.008116 | -0.029027 | 0.836184 |
| aSWAN-mLEV  | 2572 | 10 <sup>2</sup> | 0.014940 | 0.062326 | 0.055223 | 0.142857 | 0.121035  | 0.014940 |
|             |      | 10 <sup>3</sup> | 0.016842 | 0.080596 | 0.055223 | 0.142857 | 0.121838  | 0.019188 |
|             |      | 10 <sup>4</sup> | 0.07106  | 0.073536 | 0.055223 | 0.142857 | 0.083059  | 0.094857 |
|             |      | 10 <sup>5</sup> | 0.019231 | 0.059351 | 0.055223 | 0.142857 | 0.103793  | 0.024405 |
|             |      | 10 <sup>6</sup> | 0.012540 | 0.055699 | 0.055223 | 0.142857 | 0.107075  | 0.016251 |
| aCC-mLEV    | 277  | 10 <sup>2</sup> | 0.968103 | 0.689329 | 0.567959 | 0.019674 | -0.277604 | 0.982964 |
|             |      | 10 <sup>3</sup> | 0.817921 | 0.667979 | 0.567959 | 0.019674 | -0.083821 | 0.820023 |
|             |      | 10 <sup>4</sup> | 0.679465 | 0.592730 | 0.567959 | 0.019674 | -0.029217 | 0.657525 |
|             |      | 10 <sup>5</sup> | 0.650599 | 0.570858 | 0.567959 | 0.019674 | -0.023283 | 0.620683 |
|             |      | 10 <sup>6</sup> | 0.647907 | 0.568257 | 0.567959 | 0.019674 | -0.022775 | 0.616699 |
| aLEV-mLEV   | 906  | 10 <sup>2</sup> | 0.837098 | 0.543085 | 0.310591 | 0.061224 | -0.259610 | 0.939662 |
|             |      | 10 <sup>3</sup> | 0.650889 | 0.536051 | 0.310591 | 0.061224 | -0.149865 | 0.758152 |
|             |      | 10 <sup>4</sup> | 0.312554 | 0.402944 | 0.310591 | 0.061224 | -0.010495 | 0.402029 |
|             |      | 10 <sup>5</sup> | 0.226095 | 0.323742 | 0.310591 | 0.061224 | 0.008892  | 0.293303 |
|             |      | 10 <sup>6</sup> | 0.216339 | 0.311979 | 0.310591 | 0.061224 | 0.010911  | 0.280331 |

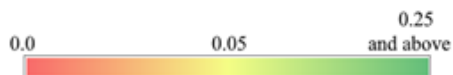

**Table S7. Summary statistics and parameters of the ABC analyses.** Names and descriptions of all summary statistics and parameters employed in the statistical inference by ABC. The number and letter codes in the second column are used to identify the exact sets of summary statistics and parameters used in every phase of analysis (shown in Tables S8, S10 and S12).

| Type               | Code              | Short name | Description                                            |                                                                            |
|--------------------|-------------------|------------|--------------------------------------------------------|----------------------------------------------------------------------------|
| Summary Statistics | Single-population | 1          | HapTypes                                               | Number of different haplotypes in the sample                               |
|                    |                   | 2          | PrivHaps                                               | Number of haplotypes exclusive of the sample                               |
|                    |                   | 3          | SegSites                                               | Number of segregating sites in the sample alignment                        |
|                    |                   | 4          | PairDiff                                               | Average number of differences between all sequences' pairs of the sample   |
|                    |                   | 5          | NucDiver                                               | Sample's nucleotide diversity                                              |
|                    |                   | 6          | GenDiver                                               | Gene diversity                                                             |
|                    |                   | 7          | TajimasD                                               | Statistic $D$ of Tajima                                                    |
|                    |                   | 8          | FusFs                                                  | Statistic $F_s$ of Fu                                                      |
|                    | Two-population    | 9          | PairDifG                                               | Average number of differences between sequences pairs of different samples |
|                    |                   | 10         | Fst                                                    | Statistic of population divergence $F_{ST}$                                |
|                    |                   | 11         | SharedHap                                              | Number of haplotypes shared between 2 samples                              |
|                    |                   | 12         | ShareFreq                                              | Sum of minimum frequencies of haplotypes shared between 2 samples          |
| Parameters         | A                 | Ne         | Effective population size of a terminal population     |                                                                            |
|                    | B                 | Ev-Ne      | Effective population size of an ancestral population   |                                                                            |
|                    | C                 | Time       | Time to an event (or most recent population delimiter) |                                                                            |
|                    | D                 | Mut_rate   | Mutation rate in substitutions per site per year       |                                                                            |

**Table S8. Summary statistics and parameters of ABC analyses, phase 1.** The table below shows the combination of summary statistics and parameters of each model employed in the statistical inference by ABC, phase 1. Notice that all models require the same set of summary statistics to perform model choice but they differ in the number of parameters. The cells contain numbers and letters that correspond to the codes identifying summary statistics and parameters (brief guide under the table, full description in Table S7). The columns marked as ‘large set’, ‘mid set’, and ‘small set’ correspond to replicates of the analysis with different sets of summary statistics. The ‘population/sample’ labels serve to identify the summary statistics or parameters associated to statistical groups or ‘populations’ respectively. The actual number of summary statistics/parameters correspond to the sum of all combinations of a given column. For instance, the ‘small set’ of summary statistics included “PairDiff” of Güvercinkayası, “HapTypes” and “PairDiff” of the each of the four levels of Asikli Höyük, “PairDiff” of Körtik Tepe as well as “PairDifG” of the pairs aGK/aAH1, aAH1/aAH2, aAH2/aAH3, aAH3/aAH4, and aAH4/aKT giving an overall of 15 summary statistics, while the set of parameters of e.g. model 2 included “Ne” of the Güvercinkayası population, “time” and “Ne” of the population of Asikli Höyük 1-2, “time” and “Ne” of Asikli Höyük 3-4, “time” and “Ne” of Körtik Tepe, and “Mut\_rate”. Red text indicates the best supported model.

| ABC phase 1           |                   | Summary Statistics* |         |           | Parameters** |         |         |
|-----------------------|-------------------|---------------------|---------|-----------|--------------|---------|---------|
|                       | Population/Sample | Large set           | Mid set | Small set | Model 1      | Model 2 | Model 3 |
| Single-<br>population | Güvercinkayası    | 1,3,4,7,8           | 1,4,8   | 4         | A            | A       | A       |
|                       | Asikli Höyük 1    | 1,3,4,7,8           | 1,3,4,8 | 1,4       | B,C          | B,C     | B,C     |
|                       | Asikli Höyük 2    | 1,3,4,7,8           | 1,3,4,8 | 1,4       |              |         | B,C     |
|                       | Asikli Höyük 3    | 1,3,4,7,8           | 1,3,4,8 | 1,4       |              | B,C     | B,C     |
|                       | Asikli Höyük 4    | 1,3,4,7,8           | 1,3,4,8 | 1,4       |              |         | B,C     |
|                       | Körtik Tepe       | 4                   | 4       | 4         | B,C          | B,C     | B,C     |
| Two-<br>population**  | aGK/aAH1          | 9                   | 9       | 9         |              |         |         |
|                       | aAH1/aAH2         | 9,10,11,12          | 9,10    | 9         |              |         |         |
|                       | aAH2/aAH3         | 9,10,11,12          | 9,11    | 9         |              |         |         |
|                       | aAH3/aAH4         | 9,10,11,12          | 9,12    | 9         |              |         |         |
|                       | aAH4/aKT          | 9                   | 9       | 9         |              |         |         |
| Other                 |                   |                     |         |           | D            | D       | D       |

\* 1=HapTypes; 2=PrivHaps; 3=SegSites; 4=PairDiff; 5=NucDiver; 6=GenDiver; 7=TajimasD; 8=FusFs; 9=PairDifG; 10=Fst; 11=SharedHap; 12=ShareFreq.

\*\* A=Ne; B=Ev-Ne; C=Time; D=Mut\_rate.

\*\*\* aGK=Güvercinkayası; aAH1=Asikli Höyük 1, aAH2=Asikli Höyük 2, etc.; aKT= Körtik Tepe.

**Table S9. Model likelihoods of the ABC model choice, phase 1.** The displayed model likelihoods correspond to rejection ratios adjusted by the Euclidean distance to the empirical data. The replicates of the post-simulation analysis used different sets of summary statistics as shown in Table S8. The column of random forests shows the number of forests selecting each model and the model likelihood of the selected model (recall that random forests-ABC does not estimate likelihoods for non-selected models). The range of Bayes factors considers the selected model (in red) as a reference.

| Model | Brief description                            | Model likelihoods |               |               | Random forests |
|-------|----------------------------------------------|-------------------|---------------|---------------|----------------|
|       |                                              | Large set         | Mid set       | Small set     |                |
| 1     | No-change at Asikli Höyük                    | 0.2045            | 0.1427        | 0.1591        | 234            |
| 2     | Two-stages during Asikli Höyük's occupation  | <b>0.4024</b>     | <b>0.5407</b> | <b>0.4565</b> | <b>405</b>     |
| 3     | Four-stages during Asikli Höyük's occupation | 0.3931            | 0.3166        | 0.3843        | 361            |
|       | Bayes Factor range/RF-model likelihood       | 1.0-2.0           | 1.7-3.8       | 1.2-2.9       | 0.5854         |

**Table S10. Summary statistics and parameters of ABC analyses, phase 2.** The table below shows the combination of summary statistics and parameters of each model employed in the statistical inference by ABC, phase 2. Notice that all models require the same set of summary statistics to perform model choice but they differ in the number of parameters. The cells contain numbers and letters that correspond to the codes identifying summary statistics and parameters (brief guide under the table, full description in Table S7). The columns marked as '27-set', '24-set', etc. correspond to replicates of the analysis with different sets of summary statistics. The 'population/sample' labels serve to identify the summary statistics or parameters associated to statistical groups or 'populations' respectively. The actual number of summary statistics/parameters correspond to the sum of all combinations of a given column. Red text indicates the best supported models.

| ABC phase 2       |                                 | Summary Statistics* |         |        |          |          | Parameters** |         |         |         |         |         |         |         |
|-------------------|---------------------------------|---------------------|---------|--------|----------|----------|--------------|---------|---------|---------|---------|---------|---------|---------|
|                   | Population/Sample               | 27-set              | 24-set  | 21-set | 15-set-T | 15-set-F | Model A      | Model B | Model C | Model D | Model E | Model F | Model G | Model H |
| Single population | Güvercinkayası                  | 1,3,4,7,8           | 1,3,4,8 | 1,4,8  | 1,4,7    | 1,4,8    | A            | A       | A       | A       | A       | A       | A       | A       |
|                   | Neolithic southwestern Anatolia | 1,3,4,7,8           | 1,3,4,8 | 1,4,8  | 1,4,7    | 1,4,8    | B,C          | A       | A       | A       | B,C     | A       | A       | A       |
|                   | Asikli Höyük                    | 1,3,4,7,8           | 1,3,4,8 | 1,4,8  | 1,4,7    | 1,4,8    | B,C          | A       | A       | A       | A       | B,C     | B,C     | B,C     |
|                   | Körtik Tepe                     |                     |         |        |          |          | B,C          | B,C     | B,C     | A       | A       | B,C     | B,C     | B,C     |
|                   | Ancestor aGK/aSWAN              |                     |         |        |          |          |              |         |         | B,C     | B,C     | B,C     | B,C     | B,C     |
|                   | Ancestor population             |                     |         |        |          |          |              | B,C     | B,C     | B,C     | B,C     | B,C     | B,C     | B,C     |
| Two-population    | aGK/aSWAN                       | 9,10                | 9,10    | 9,10   | 9        | 9        |              |         |         |         |         |         |         |         |
|                   | aGK/aAH                         | 9,10                | 9,10    | 9,10   | 9        | 9        |              |         |         |         |         |         |         |         |
|                   | aGK/aKT                         | 9,10                | 9,10    | 9,10   | 9        | 9        |              |         |         |         |         |         |         |         |
|                   | aSWAN/aAH                       | 9,10                | 9,10    | 9,10   | 9        | 9        |              |         |         |         |         |         |         |         |
|                   | aSWAN/aKT                       | 9,10                | 9,10    | 9,10   | 9        | 9        |              |         |         |         |         |         |         |         |
|                   | aAH/aKT                         | 9,10                | 9,10    | 9,10   | 9        | 9        |              |         |         |         |         |         |         |         |
| Other             |                                 |                     |         |        |          |          | D            | D       | D       | D       | D       | D       | D       | D       |

\* 1=HapTypes; 2=PrivHaps; 3=SegSites; 4=PairDiff; 5=NucDiver; 6=GenDiver; 7=TajimasD; 8=FusFs; 9=PairDifG; 10=Fst; 11=SharedHap; 12=ShareFreq.

\*\* A=Ne; B=Ev-Ne; C=Time; D=Mut\_rate.

\*\*\* aGK=Güvercinkayası; aSWAN=Neolithic southwestern Anatolia; aAH=Asikli Höyük; aKT= Körtik Tepe.

**Table S11. Model likelihoods of the ABC model choice, phase 2.** The displayed model likelihoods correspond to rejection ratios adjusted by the Euclidean distance to the empirical data. The replicates of the post-simulation analysis used different sets of summary statistics as shown in Table S10. The column of random forests shows the number of forests selecting each model and the model likelihood of the selected model (recall that random forests-ABC does not estimate likelihoods for non-selected models). The range of Bayes factors considers the selected model (in red) as a reference. Parentheses in the second column summarize a genetic structure in Newick format while a ‘/’ indicates belonging to the same continuous population e.g. ‘aAH/aGK’ indicates that Güvercinkayası descend from the Asikli Höyük population.

| Model | Brief description                      | Model likelihoods |               |               |               |               | Random forests |
|-------|----------------------------------------|-------------------|---------------|---------------|---------------|---------------|----------------|
|       |                                        | 27-set            | 24-set        | 21-set        | 15-set-T      | 15-set-F      |                |
| A     | Single continuous population           | 0.1563            | 0.1451        | 0.1291        | 0.1423        | <b>0.1645</b> | 158            |
| B     | ((aAH,aSWAN),aGK)*                     | 0.1532            | 0.1631        | 0.1591        | 0.1215        | 0.1504        | 38             |
| C     | ((aAH,aGK),aSWAN)*                     | 0.0541            | 0.0555        | 0.0551        | 0.0340        | 0.1104        | 6              |
| D     | (aAH,(aSWAN,aGK))*                     | <b>0.1883</b>     | <b>0.1934</b> | <b>0.2044</b> | <b>0.2060</b> | 0.159         | 243            |
| E     | (aAH,aSWAN/aGK)*                       | 0.1556            | 0.0815        | 0.1401        | 0.1128        | 0.096         | 30             |
| F     | (aAH/aSWAN,aGK)*                       | 0.1194            | 0.1113        | 0.1414        | 0.1017        | 0.1469        | 154            |
| G     | (aAH/aGK,aSWAN)*                       | 0.0567            | 0.0914        | 0.0870        | 0.1349        | 0.0626        | 7              |
| H     | aAH/(aGK,aSWAN)*                       | 0.1161            | 0.1711        | 0.1501        | 0.1465        | 0.1098        | <b>364</b>     |
|       | Bayes Factor range/RF-model likelihood | 1.2-3.5           | 1.0-4.5       | 1.1-5.4       | 1.4-6.0       | 1.0-2.6       | 0.6089         |

aGK=Güvercinkayası; aAH=Asikli Höyük, aSWAN=Neolithic southwestern Anatolia including Suberde, Çukuriçi, Menteşe and Marmara regions.

**Table S12. Summary statistics and parameters of ABC analyses, phases 3-4.** The cells contain numbers and letters indicating the summary statistics and parameters employed in the statistical inference by ABC, phases 3 and 4. The columns marked as '47-set', '36-set', etc. correspond to replicates of the analysis with the same simulations but different sets of summary statistics. The 'population/sample' labels serve to identify the summary statistics or parameters associated to statistical groups or 'populations' respectively. The actual number of summary statistics/parameters is the sum of all combinations of a given column. Red letters indicate the best supported model.

| ABC phase 3       |                                 | Summary Statistics* |           |         |          |          |        | Parameters** |         |         |         |         |     |
|-------------------|---------------------------------|---------------------|-----------|---------|----------|----------|--------|--------------|---------|---------|---------|---------|-----|
|                   | Population/Sample               | 47-set              | 36-set    | 31-set  | 26-set-T | 26-set-F | 21-set | Model A      | Model B | Model C | Model D | Model E |     |
| Single population | Modern Europe                   | 1,3,4,7,8           | 1,3,4,7,8 | 1,4,7,8 | 1,4,7    | 1,4,8    | 1,4    | A            | A       | A       | A       | A       |     |
|                   | Ancient Europe                  | 1,3,4,7,8           | 1,3,4,7,8 | 1,4,7,8 | 1,4,7    | 1,4,8    | 1,4    | A            | A       | A       | A       | A       |     |
|                   | Güvercinkayası                  | 1,3,4,7,8           | 1,3,4,7,8 | 1,4,7,8 | 1,4,7    | 1,4,8    | 1,4    | A            | A       | A       | B,C     | A       |     |
|                   | Neolithic southwestern Anatolia | 1,3,4,7,8           | 1,3,4,7,8 | 1,4,7,8 | 1,4,7    | 1,4,8    | 1,4    | A            | A       | B,C     | A       | A       |     |
|                   | Asikli Höyük                    | 1,3,4,7,8           | 1,3,4,7,8 | 1,4,7,8 | 1,4,7    | 1,4,8    | 1,4    | A            | A       | A       | A       | A       |     |
|                   | Körtik Tepe                     |                     |           |         |          |          |        | B,C          | B,C     | B,C     | B,C     | B,C     | B,C |
|                   | Ancestor Europe                 |                     |           |         |          |          |        | B,C          | B,C     | B,C     | B,C     | B,C     | B,C |
|                   | Ancestor aGK/aSWAN              |                     |           |         |          |          |        | B,C          | B,C     | B,C     | B,C     | B,C     | B,C |
|                   | Ancestor population             |                     |           |         |          |          |        | B,C          | B,C     | B,C     | B,C     | B,C     | B,C |
| Two-population    | mEU/aEU                         | 9,10                | 9         | 9       | 9        | 9        | 9      |              |         |         |         |         |     |
|                   | aEU/aGK                         | 9,10                | 9         | 9       | 9        | 9        | 9      |              |         |         |         |         |     |
|                   | aEU/aSWAN                       | 9,10                | 9         | 9       | 9        | 9        | 9      |              |         |         |         |         |     |
|                   | aEU/aAH                         | 9,10                | 9         | 9       | 9        | 9        | 9      |              |         |         |         |         |     |
|                   | aEU/aKT                         | 9,10                | 9         | 9       | 9        | 9        | 9      |              |         |         |         |         |     |
|                   | aGK/aSWAN                       | 9,10                | 9         | 9       | 9        | 9        | 9      |              |         |         |         |         |     |
|                   | aGK/aAH                         | 9,10                | 9         | 9       | 9        | 9        | 9      |              |         |         |         |         |     |
|                   | aGK/aKT                         | 9,10                | 9         | 9       | 9        | 9        | 9      |              |         |         |         |         |     |
|                   | aSWAN/aAH                       | 9,10                | 9         | 9       | 9        | 9        | 9      |              |         |         |         |         |     |
|                   | aSWAN/aKT                       | 9,10                | 9         | 9       | 9        | 9        | 9      |              |         |         |         |         |     |
|                   | aAH/aKT                         | 9,10                | 9         | 9       | 9        | 9        | 9      |              |         |         |         |         |     |
| Other             |                                 |                     |           |         |          |          | D      | D            | D       | D       | D       |         |     |

\* Definition in Table S7 (above): 1=HapTypes; 2=PrivHaps; 3=SegSites; 4=PairDiffs; 5=NucDiver; 6=GenDiver; 7=TajimasD; 8=FusFs; 9=PairDiffs; 10=Fst; 11=SharedHap; 2=ShareFreq.

\*\* Definition in Table S7 (above): A=Ne; B=Ev-Ne; C=Time; D=Mut\_rate.

\*\*\* mEU=Modern Europe; aEU=ancient Europe; aGK=Güvercinkayası; aSWAN=Neolithic southwestern Anatolia; aAH=Asikli Höyük; aKT= Körtik Tepe.

**Supplementary Table S13. Model likelihoods of the ABC model choice, phase 3.** The displayed model likelihoods correspond to rejection ratios adjusted by the Euclidean distance to the empirical data. The replicates of the post-simulation analysis used different sets of summary statistics as shown in Table S12. The column of random forests shows the number of forests selecting each model and the model likelihood of the selected model (recall that random forests-ABC does not estimate likelihoods for non-selected models). The range of Bayes factors considers the selected model (in red) as a reference.

| Model | Brief description                      | Model likelihoods |        |        |          |          |          | Random forests |
|-------|----------------------------------------|-------------------|--------|--------|----------|----------|----------|----------------|
|       |                                        | 47-set            | 36-set | 31-set | 26-set-T | 26-set-F | 21-set   |                |
| A     | EU from independent branch             | 0.0117            | 0.0112 | 0.0054 | 0.0041   | 0.0013   | 0.0003   | 240            |
| B     | EU descends from aAH                   | 0.0142            | 0.0142 | 0.0086 | 0.0186   | 0.0055   | 0.0022   | 115            |
| C     | EU descends from aSWAN                 | 0.3997            | 0.3962 | 0.3557 | 0.4177   | 0.4595   | 0.4321   | 38             |
| D     | EU descends from aGK                   | 0.2954            | 0.3021 | 0.3192 | 0.2904   | 0.2844   | 0.2197   | 259            |
| E     | EU branch is sister to aGK & aSWAN     | 0.2787            | 0.2760 | 0.3108 | 0.2690   | 0.2491   | 0.3456   | 348            |
|       | Bayes Factor range/RF-model likelihood | 1.4-34            | 1.3-29 | 1.1-65 | 1.4-102  | 1.6-342  | 1.3-1271 | 0.5054         |

EU=Europe, including both ancient and modern European samples; aGK=Güvercinkayası; aAH=Asikli Höyük; aSWAN=Neolithic southwestern Anatolia including Suberde, Çukuriçi, Menteşe and Marmara regions.



**Supplementary Table S14. Contact information of new sheep samples.** Inquiries regarding all new samples reported in this study, both modern and ancient ones, can be directed to the authors listed below. The samples they provided are indicated regarding their list number on Table S5.

| Responsible                             | Email                                       | Samples (Table S5)                                                                       |
|-----------------------------------------|---------------------------------------------|------------------------------------------------------------------------------------------|
| Andrea Zeeb-Lanz                        | zeeblanz@outlook.de                         | 465-466                                                                                  |
| Barbara Horejs                          | Barbara.Horejs@oeaw.ac.at                   | 545                                                                                      |
| Benjamin S Arbuckle                     | bsarbu@email.unc.edu                        | 543-544                                                                                  |
| Canan Çakırlar                          | c.cakirlar@rug.nl                           | 528-532, 541-542                                                                         |
| Daniel Bradley                          | dbradley@tcd.ie                             | 487-489                                                                                  |
| David Allen<br>Hampshire Cultural Trust | dave_allen99@hotmail.com                    | 476-478                                                                                  |
| David Griffiths                         | david.griffiths@arch.ox.ac.uk               | 470-471, 472                                                                             |
| David Orton                             | david.orton@york.ac.uk                      | 491-502                                                                                  |
| Eberhard Sauer                          | esauer@exseed.ed.ac.uk                      | 504-517                                                                                  |
| Fatmasevil Gülçur                       | sgulcur@istanbul.edu.tr                     | 546-565                                                                                  |
| Gesine Lühken                           | gesine.luehken@agrار.uni-giessen.de         | 26-28, 40-42, 52-55, 82-92, 108-113, 117-120, 180-182, 189-198                           |
| Helmkut Hemmer                          | H.Hemmer-Mainz@gmx.de                       | 461                                                                                      |
| Ivica Medugorac                         | ivica.medjugorac@gen.vetmed.uni-muenchen.de | 29-38, 43-51, 56-75, 77-80, 93-96, 166-169, 199-200                                      |
| Jelena Bulatović                        | jelena.bulatovic@gu.se                      | 503                                                                                      |
| Joachim Burger                          | jburger@uni-mainz.de                        | 459-460, 462-464                                                                         |
| Lionel Gourichon                        | Lionel.GOURICHON@univ-cotedazur.fr          | 533-540                                                                                  |
| Liora Kolska Horwitz                    | lix1000@gmail.com                           | 518-527                                                                                  |
| Lisa Brown<br>Wiltshire Museum          | lisa.brown@wiltshiremuseum.org.uk           | 484                                                                                      |
| Mihriban Özbaşaran                      | ozbasaranmihriban@gmail.com                 | 566-627                                                                                  |
| Mike Parker Pearson                     | m.parker-pearson@ucl.ac.uk                  | 473-474, 479-483                                                                         |
| Natalia Zinovieva                       | n_zinovieva@mail.ru                         | 172-175, 177-178, 183-186, 373-376, 378-381, 383-386, 388-389, 391-398, 400-415, 444-445 |
| Niall Sharples                          | sharples@cardiff.ac.uk                      | 467, 475                                                                                 |
| Nick Card                               | nick.card@uhi.ac.uk                         | 485-486                                                                                  |
| Petar Zidarov                           | petar.zidarov@gmail.com                     | 457-458                                                                                  |
| Simon Stoddart                          | ss16@cam.ac.uk                              | 490                                                                                      |
| Vecihi Özkaya                           | vozkaya@dicle.edu.tr                        | 628-629                                                                                  |

## REFERENCES AND NOTES

1. H. Hongo, R. H. Meadow, Pig exploitation at Neolithic Çayönü Tepesi southeastern Anatolia, in *Ancestors for the Pigs: Pigs in Prehistory*, M. Nelson, Ed. (MASCA Research Papers in Science and Archaeology 15, Museum of Archaeology and Anthropology, Univ. of Pennsylvania, Philadelphia 1998), pp. 77–89.
2. J. Peters, A. von den Driesch, D. Helmer, M. S. Segui, Early animal husbandry in the Northern Levant. *Paléorient* **25**, 27–48 (1999).
3. J. Peters, A. von den Driesch, D. Helmer, in The Upper Euphrates-Tigris Basin: Cradle of agro-pastoralism?, in *The First Steps of Animal Domestication*, J.-D. Vigne, J. Peters, D. Helmer, Eds. (Oxbow Books, 2005), pp. 96–124.
4. K.-I. Tanno, G. Willcox, How fast was wild wheat domesticated? *Science* **311**, 1886 (2006).
5. E. Asouti, D. Q. Fuller, A contextual approach to the emergence of agriculture in Southwest Asia: Reconstructing early neolithic plant-food production. *Curr. Anthropol.* **54**, 299–345 (2013).
6. C. Kabukcu, E. Asouti, N. Pöllath, J. Peters, N. Karul, Pathways to plant domestication in Southeast Anatolia based on new data from aceramic Neolithic Gusir Höyük. *Sci. Rep.* **11**, 2112 (2021).
7. D. Baird, A. Fairbairn, E. Jenkins, L. Martin, C. Middleton, J. Pearson, E. Asouti, Y. Edwards, C. Kabukcu, G. Mustafaoğlu, N. Russell, O. Bar-Yosef, G. Jacobsen, X. Wu, A. Baker, S. Elliott, Agricultural origins on the Anatolian plateau. *Proc. Natl. Acad. Sci. U.S.A* **115**, E3077–E3086 (2018).
8. M. C. Stiner, N. D. Munro, H. Buitenhuis, G. Duru, M. Özbaşaran, An endemic pathway to sheep and goat domestication at Aşıklı Höyük (Central Anatolia, Turkey). *Proc. Natl. Acad. Sci. U.S.A* **119**, e2110930119 (2022).

9. S. Riehl, M. Zeidi, N. J. Conard, Emergence of agriculture in the foothills of the Zagros mountains of Iran. *Science* **341**, 65–67 (2013).
10. J. Conolly, S. Colledge, K. Dobney, J.-D. Vigne, J. Peters, B. Stopp, K. Manning, S. Shennan, Meta-analysis of zooarchaeological data from SW Asia and SE Europe provides insight into the origins and spread of animal husbandry. *J. Archaeol. Sci.* **38**, 538–545 (2011).
11. B. S. Arbuckle, S. W. Kansa, E. Kansa, D. Orton, C. Çakırlar, L. Gourichon, L. Atici, A. Galik, A. Marciniak, J. Mulville, H. Buitenhuis, D. Carruthers, B. De Cupere, A. Demiregi, S. Frame, D. Helmer, L. Martin, J. Peters, N. Pöllath, K. Pawłowska, N. Russell, K. Twiss, D. Würtenberger, Data sharing reveals complexity in the westward spread of domestic animals across Neolithic Turkey. *PLOS ONE* **9**, e99845 (2014).
12. J.-D. Vigne, I. Carrère, F. Briois, J. Guilaine, The early process of mammal domestication in the Near East: New evidence from the Pre-Neolithic and Pre-Pottery Neolithic in Cyprus. *Curr. Anthropol.* **52**, S255–S271 (2011).
13. J.-D. Vigne, L. Gourichon, D. Helmer, L. Martin, J. Peters, in *Quaternary of the Levant. Environments, Climate Change, and Humans*, E. Yehouda, B.-Y. Ofer, Eds. (Cambridge Univ. Press, 2017), pp. 753–760.
14. L. Gourichon, L. K. Horwitz, An inter-regional comparison of animal domestication in the northern and southern Levant. *Food Hist.* **19**, 53–78 (2021).
15. D. Q. Fuller, J. Van Etten, K. Manning, C. Castillo, E. Kingwell-Banham, A. Weisskopf, L. Qin, Y.-I Sato, R. J. Hijmans, The contribution of rice agriculture and livestock pastoralism to prehistoric methane levels: An archaeological assessment. *Holocene* **21**, 743–759 (2011).
16. H.-P. Uerpmann, *Probleme der Neolithisierung des Mittelmeerraums* (Beihefte zum Tübinger Atlas des Vorderen Orients; Ludwig Reichert, 1979).

17. A. Ervynck, K. Dobney, H. Hongo, R. Meadow, Born Free? New evidence for the status of “*Sus scrofa*” at Neolithic Çayönü Tepesi (Southeastern Anatolia, Turkey). *Paléorient* **27**, 47–73 (2001).
18. J. Peters, F. Neuberger, I. Wiechmann, M. Zimmermann, M. Balasse, N. Pöllath, Shaping the sheep: Human management and decision-making at Aşıklı Höyük, Central Anatolia, in *The Early Settlement at Aşıklı Höyük. Essays in Honor of Ufuk Esin*, M. Özbaşaran, G. Duru, M. Stiner, Eds. (Ege Yayınları, 2018), pp. 325–344.
19. J. Peters, B. S. Arbuckle, N. Pöllath, Subsistence and beyond: Animals in Neolithic Anatolia, in *The Neolithic in Turkey. 10500–5200 BC: Environment, Settlement, Flora, Fauna, Dating, Symbols of belief, with Views from North, South, East, and West*, M. Özdoğan, N. Başgelen, P. Kuniholm, Eds. (Archaeology & Art Publications, 2014), pp. 135–203.
20. D. Helmer, Révision de la faune de Cafer Höyük (Malatya, Turquie). Apports des méthodes de l’analyse de mélanges et de l’analyse de Kernel à la mise en évidence de la domestication, in *Archaeozoology of the Near East VIII*, E. Vila, L. Gourichon, A. M. Choyke, H. Buitenhuis, Eds. (Travaux de la Maison de l’Orient et de la Méditerranée 49, 2008), pp. 169–196.
21. M. Özbaşaran, Re-starting at Aşıklı. *Anatolia antiqua. Eski Anadolu* **19**, 27–37 (2011).
22. M. Özbaşaran, Aşıklı Höyük, in *The Neolithic in Turkey. New Excavations and New Research: Central Turkey*, M. Özdoğan, N. Başgelen, P. Kuniholm, Eds. (Archaeology & Art Publications, 2012), pp. 135–158.
23. M. C. Stiner, H. Buitenhuis, G. Duru, S. L. Kuhn, S. M. Mentzer, N. D. Munro, N. Pöllath, J. Quade, G. Tsartsidou, M. Özbaşaran, A forager–herder trade-off, from broad-spectrum hunting to sheep management at Aşıklı Höyük, Turkey. *Proc. Natl. Acad. Sci. U.S.A* **111**, 8404–8409 (2014).
24. H. Buitenhuis, J. Peters, N. Pöllath, M. C. Stiner, N. D. Munro, O. Sarıtaş, The faunal remains from levels 3 and 2 of Aşıklı Höyük: Evidence for emerging management

- practices, in: *The Early Settlement at Aşıklı Höyük. Essays in Honor of Ufuk Esin*, M. Özbaşaran, G. Duru, M. C. Stiner Eds. (Ege Yayınları, 2018), pp. 281–323.
25. M. I. Zimmermann, N. Pöllath, M. Özbaşaran, J. Peters, Joint health in free-ranging and confined small bovids—Implications for early stage caprine management. *J. Archaeol. Sci.* **92**, 13–27 (2018).
26. S. M. Mentzer. Micromorphological analyses of anthropogenic materials and insight into tell formation processes at Aşıklı Höyük, in *The Early Settlement at Aşıklı Höyük. Essays in Honor of Ufuk Esin*, M. Özbaşaran, G. Duru, M. Stiner, Eds. (Ege Yayınları, 2018), pp. 105–128.
27. J T Abell, J. Quade, G. Duru, S M Mentzer, M C Stiner, M. Uzdurum, M. Özbaşaran, Urine salts elucidate Early Neolithic animal management at Aşıklı Höyük, Turkey. *Sci. Adv.* **5**, eaaw0038 (2019).
28. F. Neuberger, M. Balasse, N. Pöllath, J. Peters, Diet of wild versus culturally controlled caprines in Early Neolithic Anatolia based on stable carbon isotope analysis of bone apatite, in: *Animals: Cultural Identifiers in Ancient Societies*, J. Peters, G. McGlynn, V. Goebel, Eds. (Documenta Archaeobiologiae 15, M. Leidorf, 2019), pp. 251–260.
29. G. Tsartsidou, The microscopic record of Aşıklı Höyük: Phytolith analysis of material from the 2012–2016 field seasons, in *The Early Settlement at Aşıklı Höyük. Essays in Honor of Ufuk Esin*, M. Özbaşaran, G. Duru, M. Stiner, Eds. (Ege Yayınları, 2018), pp. 147–189.
30. F.-H. Lv, W.-F. Peng, J. Yang, Y.-X. Zhao, W.-R. Li, M.-J. Liu, Y.-H. Ma, Q.-J. Zhao, G.-L. Yang, F. Wang, J.-Q. Li, Y.-G. Liu, Z.-Q. Shen, S.-G. Zhao, E. Hehua, N. A. Gorkhali, S. M. F. Vahidi, M. Muladno, A. N. Naqvi, J. Tabell, T. Iso-Touru, M. W. Bruford, J. Kantanen, J.-L. Han, M.-H. Li, Mitogenomic meta-analysis identifies two phases of migration in the history of eastern eurasian sheep. *Mol. Biol. Evol.* **32**, 2515–2533 (2015).
31. J. R. S. Meadows, S. Hiendleder, J. W. Kijas, Haplogroup relationships between domestic and wild sheep resolved using a mitogenome panel. *Heredity* **106**, 700–706 (2011).

32. O. H. D. Brahi, H. Xiang, X. Chen, S. Farougou, X. Zhao, Mitogenome revealed multiple postdomestication genetic mixtures of West African sheep. *J. An. Breed. Genet.* **132**, 399–405 (2015).
33. S. Hiendleder, K. Mainz, Y. Plante, H. Lewalski, Analysis of mitochondrial DNA indicates that domestic sheep are derived from two different ancestral maternal sources: No evidence for contributions from urial and argali sheep. *J. Heredity* **89**, 113–120 (1998).
34. J. P. Burgstaller, P. Schinogl, A. Dinnyes, M. Müller, R. Steinborn, Mitochondrial DNA heteroplasmy in ovine fetuses and sheep cloned by somatic cell nuclear transfer. *BMC Dev. Biol.* **7**, 141 (2007).
35. H. Lancioni, Phylogenetic relationships of three italian merino-derived sheep breeds evaluated through a complete mitogenome analysis. *PLOS ONE* **8**, e73712 (2013).
36. X. Li, Whole-genome resequencing of wild and domestic sheep identifies genes associated with morphological and agronomic traits. *Nat. Commun.* **11**, 2815 (2020).
37. S. I. Mustafa, T. Schwarzacher, J. S. Heslop-Harrison, Complete mitogenomes from Kurdistani sheep: Abundant centromeric nuclear copies representing diverse ancestors. *Mitochondrial DNA Part A* **29**, 1180–1193 (2018).
38. Y. Niu, M. Jin, Y. Li, P. Li, J. Zhou, X. Wang, B. Petersen, X. Huang, Q. Kou, Y. Chen, Biallelic  $\beta$ -carotene oxygenase 2 knockout results in yellow fat in sheep via CRISPR/Cas9. *An. Genet.* **48**, 242–244 (2017).
39. S. Reicher, E. Seroussi, J. I. Weller, A. Rosov, E. Gootwine, Ovine mitochondrial DNA sequence variation and its association with production and reproduction traits within an Afec-Assaf flock1. *J. An. Sci.* **90**, 2084–2091 (2012).
40. J. Yang, W.-R. Li, F.-H. Lv, S.-G. He, S.-L. Tian, W.-F. Peng, Y.-W. Sun, Y.-X. Zhao, X.-L. Tu, M. Zhang, X.-L. Xie, Y.-T. Wang, J.-Q. Li, Y.-G. Liu, Z.-Q. Shen, F. Wang, G.-J. Liu, H.-F. Lu, J. Kantanen, J.-L. Han, M.-H. Li, M.-J. Liu, Whole-genome sequencing of native

sheep provides insights into rapid adaptations to extreme environments. *Molec. Biol. Evol.* **33**, 2576–2592 (2016).

41. C. Her, H.-R. Rezaei, S. Hughes, S. Naderi, M. Duffraisse, M. Mashkour, H.-R. Naghash, A. Bălăşescu, G. Luikart, S. Jordan, D. Özüt, A. Kence, M. W. Bruford, A. Tresset, J.-D. Vigne, P. Taberlet, C. Hänni, F. Pompanon, Broad maternal geographic origin of domestic sheep in Anatolia and the Zagros. *An. Genet.* **53**, 452–459 (2022).
42. E. Yurtman, O. Özer, E. Yüncü, N. D. Dağtaş, D. Koptekin, Y. G. Çakan, M. Özkan, A. Akbaba, D. Kaptan, G. Atağ, K. B. Vural, C. Y. Gündem, L. Martin, G. M. Kılınc, A. Ghalichi, S. C. Açıkan, R. Yaka, E. Sağlıcan, V. K. Lagerholm, M. Krzewińska, T. Günther, P. M. Miranda, E. Pişkin, M. Şevketoğlu, C. C. Bilgin, Ç. Atakuman, Y. S. Erdal, E. Sürer, N. E. Altınışik, J. A. Lenstra, S. Yorulmaz, M. F. Abazari, J. Hoseinzadeh, D. Baird, E. Bıçakçı, Ö. Çevik, F. Gerritsen, R. Özbal, A. Götherström, M. Somel, İ. Togan, F. Özer, Archaeogenetic analysis of Neolithic sheep from Anatolia suggests a complex demographic history since domestication. *Commun. Biol.* **4**, 1279 (2021).
43. W. T. T. Taylor, M. Pruvost, C. Posth, W. Rendu, M. T. Krajcarz, A. Abdykanova, G. Brancaleoni, R. Spengler, T. Hermes, S. Schiavinato, G. Hodgins, R. Stahl, J. Min, S. A. Kyzy, S. Fedorowicz, L. Orlando, K. Douka, A. Krivoshapkin, C. Jeong, C. Warinner, S. Shnaider, Evidence for early dispersal of domestic sheep into Central Asia. *Nat. Hum. Behav.* **5**, 1169–1179 (2021).
44. J. R. S. Meadows, I. Cemal, O. Karaca, E. Gootwine, J. W. Kijas, Five ovine mitochondrial lineages identified from sheep breeds of the Near East. *Genetics* **175**, 1371–1379 (2007).
45. R. Kamalakkannan, S. Kumar, K. Bhavana, V. R. Prabhu, C. B. Machado, H. S. Singha, D. Sureshgopi, V. Vijay, M. Nagarajan, Evidence for independent domestication of sheep mtDNA lineage A in India and introduction of lineage B through Arabian sea route. *Sci. Rep.* **11**, 19733 (2021).

46. S. Pedrosa, M. Uzun, J.-J. Arranz, B. Gutiérrez-Gil, F. S. Primitivo, Y. Bayón, Evidence of three maternal lineages in Near Eastern sheep supporting multiple domestication events. *Proc. Biol. Sci.* **272**, 2211–2217 (2005).
47. S. Singh, S. Kumar Jr, A. P. Kolte, S. Kumar, Extensive variation and sub-structuring in lineage A mtDNA in Indian sheep: Genetic evidence for domestication of sheep in India. *PLOS ONE* **8**, e77858 (2013).
48. P. Gerbault, R. G. Allaby, N. Boivin, A. Rudzinski, I. M. Grimaldi, J. C. Pires, C. C. Vigueira, K. Dobney, K. J. Gremillion, L. Barton, M. Arroyo-Kalin, M. D. Purugganan, R. de Casas, R. Bollongino, J. Burger, D. Q. Fuller, D. G. Bradley, D. J. Balding, P. J. Richerson, M. T. P. Gilbert, G. Larson, M. G. Thomas, Storytelling and story testing in domestication. *Proc. Natl Acad. Sci. U S A* **111**, 6159 (2014).
49. L. Colli, H. Lancioni, I. Cardinali, A. Olivieri, M. R. Capodiferro, M. Pellecchia, M. Rzepus, W. Zamani, S. Naderi, F. Gandini, S. M. F. Vahidi, S. Agha, E. Randi, V. Battaglia, M. T. Sardina, B. Portolano, H. R. Rezaei, P. Lymberakis, F. Boyer, E. Coissac, F. Pompanon, P. Taberlet, P. A. Marsan, A. Achilli, Whole mitochondrial genomes unveil the impact of domestication on goat matrilineal variability. *BMC Genomics* **16**, 1115 (2015).
50. V. Cubric-Curik, D. Novosel, V. Brajkovic, O. R. Stabelli, S. Krebs, J. Sölkner, D. Šalamon, S. Ristov, B. Berger, S. Trivizaki, I. Bizelis, M. Ferencaković, S. Rothhammer, E. Kunz, M. Simčič, P. Dovč, G. Bunevski, H. Bytyqi, B. Marković, M. Brka, K. Kume, S. Stojanović, V. Nikolov, N. Zinovieva, A. A. Schönherz, B. Guldbrandtsen, M. Čačić, S. Radović, P. Miracle, C. Vernesi, I. Curik, I. Medugorac, Large-scale mitogenome sequencing reveals consecutive expansions of domestic taurine cattle and supports sporadic aurochs introgression. *Evol. Appl.* **15**, 663–678 (2022).
51. K. G. Daly, V. Mattiangeli, A. J. Hare, H. Davoudi, H. Fathi, S. B. Doost, S. Amiri, R. Khazaeli, D. Decruyenaere, J. Nokandeh, T. Richter, H. Darabi, P. Mortensen, A. Pantos, L. Yeomans, P. Bangsgaard, M. Mashkour, M. A. Zeder, D. G. Bradley, Herded and hunted goat genomes from the dawn of domestication in the Zagros Mountains. *Proc. Natl Acad. Sci. U S A* **118**, e2100901118 (2021).



52. R. Bollongino, J. Burger, A. Powell, M. Mashkour, J.-D. Vigne, M. G. Thomas, Modern taurine cattle descended from small number of Near-Eastern founders. *Molec. Biol. Evol.* **29**, 2101–2104 (2012).
53. S. Emra, M. Benz, A. B. Siddiq, V. Özkaya, Adaptions in subsistence strategy to environment changes across the Younger Dryas - Early Holocene boundary at Körtiktepe Southeastern Turkey, *Holocene* **32**, 390–413 (2022).
54. N. Pöllath, R. Garcia-Gonzalez, S. Kevork, U. Mutze, M. I. Zimmermann, M. Ozbasaran, J. Peters, A non-linear prediction model for ageing foetal and neonatal sheep reveals basic issues in early neolithic husbandry. *J. Archaeol. Sci.* **130**, 105344 (2021).
55. M. Ergun, M. Tengberg, G. Willcox, C. Douché, Plants of Aşıklı Höyük and changes through time: First archaeobotanical results from the 2010–14 excavation seasons, in *The Early Settlement at Aşıklı Höyük. Essays in Honor of Ufuk Esin*, M. Ösbaşaran, G. Duru, M. Stiner Eds. (Ege Yayınları, 2018), pp. 191–217.
56. B. Ulaş, G. Fiorentino, Recent attestations of “new” glume wheat in Turkey: a reassessment of its role in the reconstruction of Neolithic agriculture. *Veget. Hist. Archaeob.* **30**, 685–701 (2021).
57. N. Marchi, L. Winkelbach, I. Schulz, M. Brama, Z. Hofmanová, J. Blöcher, C. S. Reyna-Blanco, Y. Diekmann, A. Thiéry, A. Kapopoulou, V. Link, V. Piuz, S. Kreutzer, S. M. Figarska, E. Ganiatsou, A. Pukaj, T. J. Struck, R. N. Gutenkunst, N. Karul, F. Gerritsen, J. Pechtl, J. Peters, A. Zeeb-Lanz, E. Lenneis, M. Teschler-Nicola, S. Triantaphyllou, S. Stefanović, C. Papageorgopoulou, D. Wegmann, J. Burger, L. Excoffier, The genomic origins of the world’s first farmers. *Cell* **185**, 1842–1859.e1818 (2022).
58. B. Horejs, B. Milić, F. Ostmann, U. Thanheiser, B. Weninger, A. Galik, The Aegean in the early seventh Millennium BC: Maritime networks and colonization. *J. World Prehist.* **28**, 289–330 (2015).
59. E. Özdoğan, Current research and new evidence for the neolithization process in Western Turkey. *Euro. J. Archaeol.* **18**, 33–59 (2015).

60. M. Özdoğan, in *The Central/Western Anatolian Farming Frontier*, M. Brami, B. Horejs, Eds. (Austrian Academy of Sciences, 2019), pp. 143–158.
61. R. Yaka, I. Mapelli, D. Kaptan, A. Doğu, M. Chyleński, Ö. D. Erdal, D. Koptekin, K. B. Vural, A. Bayliss, C. Mazzucato, E. Fer, S. S. Çokoğlu, V. K. Lagerholm, M. Krzewińska, C. Karamurat, H. C. Gemici, A. Sevkar, N. D. Dağtaş, G. M. Kılınç, D. Adams, A. R. Munters, E. Sağlıcan, M. Milella, E. M. J. Schotsmans, E. Yurtman, M. Çetin, S. Yorulmaz, N. E. Altınışık, A. Ghalichi, A. Juras, C. C. Bilgin, T. Günther, J. Storå, M. Jakobsson, M. de Kleijn, G. Mustafaoğlu, A. Fairbairn, J. Pearson, İ. Togan, N. Kayacan, A. Marciniak, C. S. Larsen, I. Hodder, Ç. Atakuman, M. Pilloud, E. Sürer, F. Gerritsen, R. Özbal, D. Baird, Y. S. Erdal, G. Duru, M. Özbaşaran, S. D. Haddow, C. J. Knüsel, A. Götherström, F. Özer, M. Somel, Variable kinship patterns in Neolithic Anatolia revealed by ancient genomes. *Curr. Biol.* **31**, 2455–2468 (2021).
62. H. Greenfield, A reconsideration of the secondary products revolution in south-eastern Europe: On the origins and use of domestic animals for milk, wool, and traction in the central Balkans, in *The Zooarchaeology of Fats, Oils, Milk and Dairying* (Oxbow Books, 2005), pp. 14–31.
63. C. Becker, The textile revolution. research into the origin and spread of wool production between the Near East and Central Europe. *J. Ancient Stud.* **6**, 102–151 (2016).
64. L. Excoffier, H. E. L. Lischer, Arlequin suite ver 3.5: a new series of programs to perform population genetics analyses under Linux and Windows. *Molecular Ecology Resources* **10**, 564–567 (2010).
65. S. Kumar, G. Stecher, M. Li, C. Knyaz, K. Tamura, MEGA X: Molecular evolutionary genetics analysis across computing platforms. *Mol Biol Evol* **35**, 1547–1549 (2018).
66. R. S. Waples, Temporal variation in allele frequencies: Testing the right hypothesis. *Evolution* **43**, 1236–1251 (1989).

67. E. Sandoval-Castellanos, Testing temporal changes in allele frequencies: a simulation approach. *Genet Res (Camb)* **92**, 309–320 (2010).
68. R. Bouckaert, J. Heled, D. Kühnert, T. Vaughan, C.-H. Wu, D. Xie, M. A. Suchard, A. Rambaut, A. J. Drummond, BEAST 2: A software platform for Bayesian evolutionary analysis. *PLoS Comput. Biol.* **10**, e1003537 (2014).
69. A. J. Drummond, M. A. Suchard, D. Xie, A. Rambaut, Bayesian phylogenetics with BEAUti and the BEAST 1.7. *Molec. Biol. Evol.* **29**, 1969–1973 (2012).
70. A. Rambaut, A. J. Drummond, D. Xie, G. Baele, M. A. Suchard, Posterior summarization in Bayesian phylogenetics using Tracer 1.7. *Syst. Biol.* **67**, 901–904 (2018).
71. S. Y. W. Ho, B. Shapiro, Skyline-plot methods for estimating demographic history from nucleotide sequences. *Molec. Ecol. Resour.* **11**, 423–434 (2011).
72. J. Heled, A. J. Drummond, Bayesian inference of population size history from multiple loci. *BMC Evol. Biol.* **8**, 289 (2008).
73. M. A. Beaumont, Approximate Bayesian Computation in Evolution and Ecology. *Ann. Rev. Ecol. Evol. Syst.* **41**, 379–406 (2010).
74. N. Rohland, D. Reich, S. Mallick, M. Meyer, R. E. Green, N. J. Georgiadis, A. L. Roca, M. Hofreiter, Genomic DNA Sequences from Mastodon and Woolly Mammoth Reveal Deep Speciation of Forest and Savanna Elephants. *PLoS Biol.* **8**, e1000564 (2010).
75. N. Rohland, M. Hofreiter, Comparison and optimization of ancient DNA extraction. *Biotechniques* **42**, 343–352 (2007).
76. J. Dabney, M. Knapp, I. Glocke, M.-T. Gansauge, A. Weihmann, B. Nickel, C. Valdiosera, N. García, S. Pääbo, J.-L. Arsuaga, M. Meyer, Complete mitochondrial genome sequence of a Middle Pleistocene cave bear reconstructed from ultrashort DNA fragments. *Proc. Natl Acad. Sci. U S A* **110**, 15758–15763 (2013).

77. P. Korlević, T. Gerber, M.-T. Gansauge, M. Hajdinjak, S. Nagel, A. Aximu-Petri, M. Meyer, Reducing microbial and human contamination in DNA extractions from ancient bones and teeth. *Biotechniques* **59**, 87–93 (2015).
78. K. G. Daly, P. M. Delser, V. E. Mullin, A. Scheu, V. Mattiangeli, M. D. Teasdale, A. J. Hare, J. Burger, M. P. Verdugo, M. J. Collins, R. Kehati, C. M. Ereik, G. Bar-Oz, F. Pompanon, T. Cumer, C. Çakırlar, A. F. Mohaseb, D. Decruyenaere, H. Davoudi, Ö. Çevik, G. Rollefson, J.-D. Vigne, R. Khazaeli, H. Fathi, S. B. Doost, R. R. Sorkhani, A. A. Vahdati, E. W. Sauer, H. A. Kharanaghi, S. Maziar, B. Gasparian, R. Pinhasi, L. Martin, D. Orton, B. S. Arbuckle, N. Benecke, A. Manica, L. K. Horwitz, M. Mashkour, D. G. Bradley, Ancient goat genomes reveal mosaic domestication in the Fertile Crescent. *Science* **361**, 85–88 (2018).
79. M. Meyer, M. Kircher, M.-T. Gansauge, H. Li, F. Racimo, S. Mallick, J. G. Schraiber, F. Jay, K. Prüfer, C. de Filippo, P. H. Sudmant, C. Alkan, Q. Fu, R. Do, N. Rohland, A. Tandon, M. Siebauer, R. E. Green, K. Bryc, A. W. Briggs, U. Stenzel, J. Dabney, J. Shendure, J. Kitzman, M. F. Hammer, M. V. Shunkov, A. P. Derevianko, N. Patterson, A. M. Andrés, E. E. Eichler, M. Slatkin, D. Reich, J. Kelso, S. Pääbo, A high-coverage genome sequence from an archaic Denisovan individual. *Science* **338**, 222-226 (2012).
80. C. Gamba, E. R. Jones, M. D. Teasdale, R. L. McLaughlin, G. Gonzalez-Fortes, V. Mattiangeli, L. Domboróczki, I. Kővári, I. Pap, A. Anders, A. Whittle, J. Dani, P. Raczky, T. F. G. Higham, M. Hofreiter, D. G. Bradley, R. Pinhasi, Genome flux and stasis in a five millennium transect of European prehistory. *Nat. Commun.* **5**, 5257 (2014).
81. M.-T. Gansauge, M. Meyer, Single-stranded DNA library preparation for the sequencing of ancient or damaged DNA. *Nat. Protocols* **8**, 737–748 (2013).
82. H. Li, R. Durbin, Fast and accurate long-read alignment with Burrows–Wheeler transform. *Bioinformatics* **26**, 589-595 (2010).

83. D. C. Koboldt, Q. Zhang, D. E. Larson, D. Shen, M. D. McLellan, L. Lin, C. A. Miller, E. R. Mardis, L. Ding, R. K. Wilson, VarScan 2: Somatic mutation and copy number alteration discovery in cancer by exome sequencing. *Genome Res.* **22**, 568-576 (2012).
84. J. Hein, M. Schierup, C. Wiuf, *Gene Genealogies, Variation and Evolution. A Primer in Coalescent Theory* (Oxford Univ. Press, 2004), vol. 54.
85. G. Bertorelle, A. Benazzo, S. Mona, ABC as a flexible framework to estimate demography over space and time: some cons, many pros. *Mol. Ecol.* **19**, 2609-2625 (2010).
86. C. P. Robert, J. M. Cornuet, J. M. Marin, N. S. Pillai, Lack of confidence in approximate Bayesian computation model choice. *Proc. Natl Acad. Sci. U S A* **108**, 15112-15117 (2011).
87. P. Pudlo, J.-M. Marin, A. Estoup, J.-M. Cornuet, M. Gautier, C. P. Robert, Reliable ABC model choice via random forests. *Bioinformatics* **32**, 859-866 (2016).
88. E. Sandoval-Castellanos, E. Palkopoulou, L. Dalen, Back to BaySICS: A user-friendly program for Bayesian Statistical Inference from Coalescent Simulations. *PLoS One* **9**, e98011 (2014).
89. R. Krauß, Beginnings of the Neolithic in Southeast Europe: the Early Neolithic sequence and absolute dates from Džuljunica-Smārdeš (Bulgaria). *Docum. Praehist.* **41**, 51-77 (2014).
90. D. De Groene, Pigs and humans in Early Neolithic south-eastern Europe. *Docum. Praehist.* **45**, 38-51 (2018).
91. M. Mashkour, R. Khazaeli, H. Fathi, S. Amiri, D. Decruyenaere, A. Mohaseb, H. Davoudi, S. Sheikhi, E. W. Sauer, in *Sasanian Persia: Between Rome and the Steppes of Eurasia*, E. Sauer, Ed. (Edinburgh Univ. Press, 2017), pp. 74-96.
92. K. Daly, B. S. Arbuckle, C. Rossi, V. Mattiangeli, P. A. Lawlor, M. Mashkour, E. Sauer, J. Lesur, L. Atici, C. M. Ereğ, D. G. Bradley, A novel lineage of the *Capra* genus discovered in the Taurus Mountains of Turkey using ancient genomics. *eLife* **11**, e82984 (2022).

93. J. Oldenstein, *KASTELL ALZEY Archäologische Untersuchungen im Spätromischen Lager und Studien zur Grenzverteidigung im Mainzer Dukat* (Univ. of Mainz, 2009), vol. **1**.
94. B. Boulestin, Mass cannibalism in the linear pottery culture at Herxheim (Palatinate, Germany). *Antiquity* **83**, 968–982 (2009).
95. N. Card, M. Edmonds, A. Mitchell, *The Ness of Brodgar, as it Stands*. M. Edmonds, A. Mitchell, Eds. (The Orcadian, 2020).
96. N. Card, To cut a long story short: Formal chronological modelling for the Late Neolithic site of Ness of Brodgar Orkney, *Europ. J. Archaeol.* **21**, 217–263 (2018).
97. D. Griffiths, J. Harrison, M. Athanson, *Beside the Ocean: Coastal Landscapes at the Bay of Skail, Marwick, and Birsay Bay, Orkney: Archaeological Research 2003-18*. (Oxbow Books, 2019), p. 346.
98. N. M. Sharples, in *From Machair to Mountains: Archaeological Survey and Excavation in South Uist*, M. Parker Pearson, Ed. (Oxbow Books, 2012), vol. **4**, pp. 215–258.
99. M. P. Pearson, J. Mulville, H. Smith, P. Marshall, Cladh Hallan: Roundhouses and the dead in the Hebridean Bronze Age and Iron Age, Part I: Stratigraphy, spatial organisation and chronology, in *Sheffield Environmental and Archaeological Research Campaign in the Hebrides*, (Oxbow Books, 2021), vol. **8**, p. 568.
100. N. Sharples, *A Late Iron Age Farmstead in the Outer Hebrides. Excavations at Mound 1, Bornais, South Uist*. (Oxbow Books, 2012), p. 419.
101. M. P. Pearson, M. Brennand, J. Mulville, H. Smith, Cille Pheadair: A Norse farmstead and Pictish burial cairn in South Uist, in *Sheffield Environmental and Archaeological Research Campaign in the Hebrides*, (Oxbow Books, 2018), vol. **7**, p. 656.
102. A. J. Lawson, M. J. Allen, *Potterne 1982-5: Animal Husbandry in Later Prehistoric Wiltshire*. (Trust for Wessex Archaeology, 2000).

103. B. W. Cunliffe, *Danebury: Anatomy of an Iron Age Hillfort*. (Batsford, 1983).
104. P. Wallace, The archaeology of Viking Dublin, in *The comparative history of urban origins in non-Roman Europe*, H. B. Clarke, A. Simms, Eds. (Oxford 1985), BAR International Series, 255(1), pp. 103–145.
105. S. Stoddart, A. Bonanno, T. Gouder, C. Malone, D. Trump, Cult in an island society: Prehistoric Malta in the Tarxien period. *Cambridge Archaeological J.* **3**, 3–19 (1993).
106. H. Greenfield, T. Jongsma, in *Space and Spatial Analysis in Archaeology*, E. C. Robertson, J. D. Siebert, D. C. Fernandez, M. U. Zender, Eds. (Univ. of Calgary Press, 2006), chap. 8, pp. 69–79.
107. A. Whittle, L. Bartosiewicz, D. Borić, P. Pettitt, M. P. Richards, In the beginning : new radiocarbon dates for the Early Neolithic in northern Serbia and south-east Hungary. *Antaeus.* **25**, 63-118 (2002).
108. M. Porčić, T. Blagojević, J. Pendić, S. Stefanović, The Neolithic demographic transition in the Central Balkans: Population dynamics reconstruction based on new radiocarbon evidence. *Philosop. Trans. R. Soc. B: Biol. Sci.* **376**, 20190712 (2021).
109. A. Bulatović, D. Milanović, *Bubanj The Eneolithic and the Early Bronze Age Tell in Southeastern Serbia*. (Verlag der Österreichischen Akademie der Wissenschaften, 2020), vol. **90**, p. 418.
110. T. Dothan, A. Zukerman, A preliminary study of the Mycenaean III C:1 pottery assemblages from Tel Mique-Ekron and Ashdod. *Bullet. Am. Schools Oriental Res.* **333**, 1 (2004).
111. L. K. Horwitz, E. Dahan. Animal husbandry practices during the historic periods, in *Yoqne'am I. The Late Periods*, A. Ben-Tor, M. Avissar, Y. Portugali, Eds. (Qedem Reports 3, 1996), pp. 246–255.
112. T. E. Levy, D. Alon, *Shiqmim I: Studies Concerning Chalcolithic Societies in the Northern Negev Desert, Israel (1982-1984)* (B.A.R., 1987).

113. B. Horejs, C. Schwall. Interaction as a stimulus?: Çukuriçi Höyük and the transition from the Late Chalcolithic to the Early Bronze Age in Western Anatolia, in *Communities in Transition: The Circum-Aegean Area During the 5th and 4th Millennia BC*, S. Dietz, F. Mavridis, Ž. Tankosić, T. Takaoğlu, Eds. (Oxbow Books, 2018), pp. 530–537.
114. B. S. Arbuckle, V. Özkaya, Animal exploitation at Körtik Tepe : An early Aceramic Neolithic site in southeastern Turkey. *Paléorient* **32**, 113-136 (2006).
115. V. Özkaya, A. Coşkun, Körtik Tepe, in *The Neolithic in Turkey. New Excavations and New Research. The Tigris Basin*, M. Özdoğan, N. Başgelen, I. Kuniholm, Eds. (Archaeology and Art Publications, 2011), pp. 89–127.
116. M. Benz, A. Coşkun, C. Rössner, K. Deckers, S. Riehl, K. W. Alt, V. Özkaya, First evidence of an Epipalaeolithic hunter-fisher-gatherer settlement at Körtik Tepe. *Arkeometri Sonuçları Toplantısı* **28**, 65-78 (2013).
117. B. S. Arbuckle, Revisiting Neolithic caprine exploitation at Suberde, Turkey, *J. Field Archaeol.* **33**, 219–236 (2008).
